# Supplementary material for: Molecular characterization of breast and lung tumors by integration of multiple data types with functional sparse-factor analysis
Source: PLoS Comput Biol. 2018 Oct 31;14(10):e1006520. doi: 10.1371/journal.pcbi.1006520 (PMC6231682; doi:10.1371/journal.pcbi.1006520)
Supplement: S2 Table — (XLSX) [file pcbi.1006520.s002.xlsx]

## Sheet: rppa_Translation
Epitope	funcSFA Coefficient	OLS Coefficient	p
14-3-3_beta	-0.0504593	-0.0410399	1
14-3-3_epsilon	0	-0.00028968	1
14-3-3_zeta	0.0167191	0.0387053	1
4E-BP1	0.206899	0.235435	4.83899e-06
4E-BP1_pS65	0.081013	0.057423	1
4E-BP1_pT37_T46	0	0.00409651	1
4E-BP1_pT70	0.0444886	0.0437589	1
53BP1	0.102721	0.131859	0.0254411
A-Raf	-0.00270164	-0.0226351	1
A-Raf_pS299	0.0133215	0.0202868	1
ACC1	0.125535	0.175281	0.326211
ACC_pS79	0.031494	0.0603188	1
ACVRL1	0	-0.0267186	1
ADAR1	0.11473	0.102477	0.00573257
AMPK_alpha	0.0473003	0.034821	1
AMPK_pT172	-0.0294185	-0.0439258	1
AR	0	0.0120726	1
ARID1A	0.202804	0.154593	5.96548e-07
ASNS	0.182432	0.263865	0.000813722
ATM	-0.0749314	-0.101461	1
Acetyl-a-Tubulin-Lys40	0.10975	0.217368	1
Akt	-0.0442008	-0.0612333	1
Akt_pS473	-0.120833	-0.17846	1
Akt_pT308	-0.0167096	-0.0462495	1
Annexin-1	-0.0141156	-0.0353535	1
Annexin_VII	0	0.00125785	1
B-Raf	0.0713156	0.10951	0.24803
B-Raf_pS445	-0.029767	-0.0364876	1
BRD4	0.219423	0.227406	3.26975e-13
Bad_pS112	-0.0762348	-0.0616448	1
Bak	0	0.00198738	1
Bap1-c-4	0.171047	0.137843	6.20668e-06
Bax	0	-0.0118307	1
Bcl-2	0	0.0188515	1
Bcl-xL	0	-0.00685638	1
Bcl2A1	0.0451945	0.0310158	1
Beclin	-0.0582231	-0.0423223	1
Bid	0.00530971	0.023845	1
Bim	0.170304	0.164078	0.000727363
C-Raf	0	0.0286407	1
C-Raf_pS338	0	-0.00472835	1
CD20	-0.169832	-0.0874129	0.00194407
CD26	0	0.00775818	1
CD31	-0.0880566	-0.0808974	0.128588
CD49b	0.0899089	0.0961794	1
CDK1	0.059063	0.0337692	1
CDK1_pY15	0.147783	0.117918	0.0458397
COG3	0.0812653	0.0856772	0.64974
Caspase-3	0.0870084	0.0672941	1
Caspase-7_cleavedD198	0.0604142	0.109108	1
Caspase-8	-0.117112	-0.154645	1
Caveolin-1	-0.221208	-0.451691	3.24481e-06
Chk1	0.050924	0.0481385	1
Chk1_pS296	0	-0.0125164	1
Chk1_pS345	0.041672	0.0354797	1
Chk2	0.178154	0.176323	2.03889e-05
Chk2_pT68	0.112081	0.0653447	0.0308309
Claudin-7	0.227243	0.361204	8.1462e-07
Collagen_VI	-0.0329718	-0.0653647	1
Cyclin_B1	0.341397	0.495095	5.66132e-18
Cyclin_D1	0	0.00729138	1
Cyclin_E1	0.0993599	0.0969274	1
Cyclin_E2	0.156942	0.0758016	0.00122293
DIRAS3	-0.0328668	-0.0398294	1
DJ-1	0	-0.0037766	1
DUSP4	0.042606	0.0681424	1
Dvl3	0.041739	0.0486017	1
E-Cadherin	0.135623	0.225623	0.0748775
EGFR	0.0307884	0.0504074	1
EGFR_pY1068	0.00958926	0.0369142	1
EGFR_pY1173	0.0317373	0.0265821	1
EPPK1	0.106659	0.29002	0.3349
ER-alpha	0	-0.00407695	1
ER-alpha_pS118	0.069985	0.0557688	1
ERCC1	-0.0615492	-0.0806813	1
ERCC5	0.0135528	0.0323711	1
ERK2	-0.0354505	-0.0448915	1
ETS-1	-0.0881586	-0.0559241	1
FASN	0.248756	0.341386	2.5088e-08
FOXO3a	0	-0.0147917	1
FOXO3a_pS318_S321	-0.0622764	-0.0552612	0.141186
Fibronectin	-0.0375175	-0.0605695	1
FoxM1	0.238885	0.222322	1.83751e-08
G6PD	-0.0105413	-0.0231928	1
GAB2	0	0.0121047	1
GAPDH	0.190063	0.358468	0.00135335
GATA3	-0.00780289	-0.0350008	1
GSK3-alpha-beta	0.012539	0.0332445	1
GSK3-alpha-beta_pS21_S9	-0.0568546	-0.0742504	1
GSK3_pS9	-0.0665108	-0.0909022	1
HER2	0.0430851	0.0698697	1
HER2_pY1248	0.00514814	0.0225223	1
HER3	0.0337638	0.0460924	1
HER3_pY1289	0	0.00415717	1
HSP70	0	0.0162875	1
Heregulin	0.0400896	0.0309805	1
IGF1R_pY1135_Y1136	-0.0077511	-0.0343788	1
IGFBP2	0.0503084	0.132727	1
INPP4B	-0.0451364	-0.0661427	1
IRF-1	0	0.00844143	1
IRS1	0	0.0126964	1
JAB1	-0.0110758	-0.0298265	1
JNK2	0	0.0101133	1
JNK_pT183_pY185	-0.0384274	-0.0479188	1
Jak2	-0.0121615	-0.013089	1
Ku80	0.141518	0.150586	3.83443e-06
LKB1	-0.03201	-0.0289768	1
Lck	-0.105565	-0.0845326	1
MAPK_pT202_Y204	-0.203195	-0.254655	1.04998e-05
MEK1	0.0449232	0.0389868	1
MEK1_pS217_S221	-0.0382921	-0.0457426	1
MIG-6	0.110861	0.0822364	0.0724178
MSH2	0.242135	0.240842	1.32867e-14
MSH6	0.327975	0.363599	1.12941e-24
MYH11	-0.185201	-0.522832	0.00208457
Mre11	0	0.00152464	1
Myosin-IIa_pS1943	-0.031267	-0.048042	1
N-Cadherin	0	0.0035132	1
N-Ras	0	-0.0125036	1
NDRG1_pT346	-0.100212	-0.238373	1
NF-kB-p65_pS536	-0.0316599	-0.0428681	1
NF2	0	0.00137661	1
Notch1	0.160141	0.0847615	0.00415242
P-Cadherin	0.0185889	0.0387482	1
PAI-1	-0.00152973	-0.00981659	1
PARP_cleaved	-0.0685435	-0.140373	1
PCNA	0.24618	0.166993	6.26923e-10
PDCD4	-0.099092	-0.144852	1
PDK1	0	-0.0176024	1
PDK1_pS241	0	-0.0118656	1
PEA15	-0.0373518	-0.0558386	1
PEA15_pS116	0	-0.00922369	1
PI3K-p110-alpha	0	0.00858128	1
PI3K-p85	-0.114179	-0.0740167	0.563703
PKC-alpha	-0.123012	-0.0994501	0.252283
PKC-alpha_pS657	-0.184143	-0.158842	0.00025573
PKC-delta_pS664	-0.0468619	-0.0277656	1
PKC-pan_BetaII_pS660	-0.159533	-0.180341	2.49531e-05
PR	0.0355351	0.0268385	1
PRAS40_pT246	0	-0.00659839	1
PRDX1	0	0.000590792	1
PREX1	-0.119221	-0.0849821	0.014989
PTEN	-0.0135283	-0.0316419	1
Paxillin	-0.0699349	-0.0966765	1
RBM15	0.112883	0.147343	0.00337682
Rab11	0	0.00347845	1
Rab25	0.180118	0.176091	0.000435913
Rad50	0.0176152	0.0370454	1
Rad51	0.0105063	0.0234986	1
Raptor	0	-0.00718683	1
Rb	-0.100198	-0.0971087	1
Rb_pS807_S811	0.130934	0.1604	1
Rictor	-0.0703726	-0.117362	1
Rictor_pT1135	-0.048042	-0.049119	1
S6	0.102949	0.109472	1
S6_pS235_S236	-0.153503	-0.222131	0.0308359
S6_pS240_S244	-0.107179	-0.185086	1
SCD	0	0.00980204	1
SETD2	-0.0725762	-0.113147	1
SF2	0.0183921	0.0278808	1
SHP-2_pY542	-0.0609514	-0.074945	1
STAT3_pY705	-0.106235	-0.105962	0.474393
STAT5-alpha	-0.0595425	-0.0838742	1
Shc_pY317	0.0448716	0.0354227	1
Smac	0.039181	0.0495566	1
Smad1	0.11967	0.0697571	0.0219608
Smad3	0.0134284	0.0189514	1
Smad4	0.0472699	0.0392385	1
Snail	-0.0921701	-0.177113	1
Src	0	0.0120692	1
Src_pY416	-0.0367589	-0.0656855	1
Src_pY527	-0.112869	-0.157339	1
Stathmin	0.0837555	0.0618076	0.0526691
Syk	-0.0756535	-0.0811727	1
TAZ	0.0728901	0.0395596	1
TFRC	0.191545	0.355101	0.0012491
TIGAR	0	-0.00895743	1
TSC1	-0.0335671	-0.0385301	1
TTF1	0.0427273	0.138885	1
Transglutaminase	-0.151461	-0.163345	0.0410868
Tuberin	-0.0220525	-0.0230386	1
Tuberin_pT1462	0	-0.0180354	1
VEGFR2	-0.0133047	-0.0261397	1
XBP1	-0.0120923	-0.0289548	1
XRCC1	0.181855	0.098849	3.35749e-05
YAP	0	0.00484224	1
YAP_pS127	-0.128073	-0.156753	0.376024
YB-1	-0.0968892	-0.09425	1
YB-1_pS102	-0.0161042	-0.0354767	1
beta-Catenin	0.0409352	0.0902189	1
c-Abl	0	0.0161606	1
c-Jun_pS73	-0.0239394	-0.0400721	1
c-Kit	0.0978292	0.144617	1
c-Met	-0.100051	-0.168497	1
c-Met_pY1235	0	0.0154131	1
c-Myc	0	0.0139126	1
cIAP	0	0.0208855	1
eEF2	0.108832	0.0941255	0.0196643
eEF2K	0.0416273	0.0614831	1
eIF4E	0.0608151	0.039293	1
eIF4G	0.135557	0.235046	0.000311314
mTOR	0	0.0178193	1
mTOR_pS2448	-0.0837499	-0.0768112	0.430119
p16_INK4a	0.0322962	0.0854043	1
p21	0	-0.00834793	1
p27	-0.0281969	-0.0374812	1
p27_pT157	0.0515381	0.0382637	1
p27_pT198	0	0.0227883	1
p38_MAPK	-0.0224313	-0.0329347	1
p38_pT180_Y182	-0.225373	-0.257427	5.30484e-06
p53	0	0.0349373	1
p62-LCK-ligand	-0.024863	-0.049675	1
p70S6K	0.165267	0.139241	1.30027e-05
p70S6K_pT389	0	-0.00764261	1
p90RSK	-0.0487632	-0.0467368	1
p90RSK_pT359_S363	-0.0449174	-0.0468019	1

## Sheet: rnaseq_Translation
Gene	funcSFA Coefficient	OLS Coefficient	p
ENSG00000011347.8	0.0649102	0.100962	0.00944538
ENSG00000161798.6	-0.00565758	-0.0386809	1
ENSG00000115525.15	0	0.0211686	1
ENSG00000137491.13	0	-0.0265558	1
ENSG00000133657.13	0.412313	0.266779	0
ENSG00000221867.7	0	0.0406467	1
ENSG00000156298.11	0	-0.0257222	1
ENSG00000114948.11	0	-0.0472022	1
ENSG00000099204.17	0.135998	0.099677	0.0196108
ENSG00000148175.11	0.316275	0.200765	7.45949e-19
ENSG00000157514.15	0.054533	0.0766506	0.741129
ENSG00000177697.16	0.295932	0.229418	7.05105e-35
ENSG00000140443.12	0.11931	0.102014	0.00173564
ENSG00000118816.8	0.5838	0.41403	0
ENSG00000138119.15	0.0992211	0.0756128	0.425339
ENSG00000215021.7	0.72595	0.495001	0
ENSG00000196743.7	0.253606	0.157466	1.85314e-19
ENSG00000166741.6	0.0379024	0.0874895	0.11222
ENSG00000067057.15	0.371424	0.26976	3.74887e-28
ENSG00000158467.15	0	0.0484626	1
ENSG00000023909.8	0.19019	0.171423	4.04376e-22
ENSG00000122862.4	0.0926361	0.143095	4.30987e-15
ENSG00000141526.13	0.202692	0.148189	1.23234e-09
ENSG00000120875.7	0.108191	0.111935	0.000451139
ENSG00000110880.9	0.40481	0.267214	0
ENSG00000104408.8	0.767459	0.573075	0
ENSG00000007038.9	0	0.00634088	1
ENSG00000085662.12	0.325891	0.231342	3.26789e-26
ENSG00000143387.11	0	0.00599985	1
ENSG00000111275.11	0.0828804	0.091576	0.0129342
ENSG00000167900.10	0.447311	0.320639	0
ENSG00000044115.19	0.467267	0.337629	0
ENSG00000211965.3	0	-0.0352447	1
ENSG00000145741.14	0.791379	0.5177	0
ENSG00000078369.16	0.533798	0.380484	0
ENSG00000060656.18	0	0.0060671	1
ENSG00000049540.15	-0.0437371	-0.120656	4.12312e-05
ENSG00000114374.11	0	0.00548755	1
ENSG00000039560.12	0.188968	0.139357	3.84053e-06
ENSG00000138448.10	0.207559	0.176129	3.54913e-19
ENSG00000135624.14	0.765008	0.484844	0
ENSG00000101335.8	0.0762523	0.0682298	0.717457
ENSG00000163898.8	0	-0.03812	1
ENSG00000058063.14	0.231364	0.171725	1.3591e-27
ENSG00000049323.14	0.0219432	0.0578338	1
ENSG00000158769.16	0.412139	0.275798	0
ENSG00000156471.11	0.402968	0.281429	0
ENSG00000101311.14	0.0831436	0.096906	0.00120945
ENSG00000065833.8	0.176247	0.157457	1.35095e-25
ENSG00000100994.10	0.296685	0.204597	1.68943e-16
ENSG00000232629.7	0	0.000117135	1
ENSG00000013364.17	0.032792	0.0633513	0.0903094
ENSG00000125844.14	0.0834014	0.100602	0.000881334
ENSG00000164626.8	0	0.0347729	1
ENSG00000143384.11	0.411966	0.300867	0
ENSG00000242574.7	0	0.0510092	8.62023e-05
ENSG00000179593.14	0	-0.060719	1
ENSG00000114638.6	0	-0.0638305	1
ENSG00000141736.12	0.175335	0.192762	8.7611e-14
ENSG00000146731.9	0.573658	0.428192	0
ENSG00000157613.9	0	-0.0694706	1
ENSG00000165140.8	0	-0.00586806	1
ENSG00000103888.14	0	-0.0567755	1
ENSG00000127324.7	-0.0362573	-0.0793676	1
ENSG00000084733.9	0.5894	0.363008	0
ENSG00000149573.7	0.131478	0.131726	4.00131e-07
ENSG00000225548.4	0	0.02658	1
ENSG00000176014.11	0.0978344	0.0923066	2.5522e-06
ENSG00000206073.9	0	-0.0443975	1
ENSG00000147381.10	0	0.0135256	1
ENSG00000174231.15	0.430338	0.297757	0
ENSG00000148773.11	0.268849	0.231797	8.19906e-24
ENSG00000115306.14	0.234462	0.187087	4.18454e-15
ENSG00000182871.13	0.00240479	0.0321652	1
ENSG00000150687.10	0.04893	0.0952274	0.0159719
ENSG00000067560.9	0.605747	0.421636	0
ENSG00000101160.12	0.23098	0.18718	2.13005e-28
ENSG00000177469.12	0.0817363	0.0591324	1
ENSG00000085552.15	0.126542	0.13206	1.04653e-07
ENSG00000211637.2	0	-0.0611098	0.0543221
ENSG00000170476.14	0	-0.00832085	1
ENSG00000112245.8	0.428613	0.342577	0
ENSG00000163872.14	0.252697	0.173271	1.26645e-38
ENSG00000140575.11	0.443565	0.291332	0
ENSG00000140264.18	0.628763	0.450455	0
ENSG00000211955.2	0	-0.0386158	1
ENSG00000105426.13	0.140966	0.0989288	8.25468e-05
ENSG00000165152.7	0	0.00894636	1
ENSG00000180818.4	0	0.0107171	1
ENSG00000129654.7	0	0.0188625	1
ENSG00000165280.14	0.541022	0.368352	0
ENSG00000241755.1	0	-0.0355074	1
ENSG00000103460.15	0	-0.0190101	1
ENSG00000067048.15	0	0.0315197	1
ENSG00000233864.6	0	0.0148771	1
ENSG00000136518.15	0.50009	0.358286	0
ENSG00000176945.15	0	-0.0232563	1
ENSG00000152234.14	0.709387	0.484616	0
ENSG00000104783.10	0	-0.0398634	1
ENSG00000105707.12	0	0.0298309	1
ENSG00000072041.15	0.00217718	0.0735989	0.00145852
ENSG00000163739.4	0	-0.00590602	1
ENSG00000140564.9	0.17038	0.189914	1.93892e-09
ENSG00000143850.11	0	-0.0106262	1
ENSG00000170348.7	0.602447	0.374022	0
ENSG00000234741.6	0.625679	0.511148	0
ENSG00000100201.17	0.435596	0.303637	0
ENSG00000060982.13	0.054129	0.10513	0.0564409
ENSG00000176788.8	0.156298	0.156573	5.73126e-06
ENSG00000131781.11	0	-0.0218431	1
ENSG00000142676.11	0.708761	0.562852	0
ENSG00000149257.12	0.41449	0.30115	0
ENSG00000025708.11	0.152467	0.113669	0.000141378
ENSG00000019169.10	0	-0.05141	1
ENSG00000130208.8	0.0918148	0.124317	2.1205e-07
ENSG00000251381.5	0	0.0265607	1
ENSG00000112936.17	-0.0709576	-0.126679	2.62231e-06
ENSG00000124225.14	0	-0.0129549	1
ENSG00000104687.11	0.331104	0.239042	1.77685e-42
ENSG00000111371.14	0.351497	0.288241	8.86678e-30
ENSG00000108551.4	0.0177741	0.065651	1
ENSG00000170315.12	0.60605	0.457197	0
ENSG00000114416.16	0.456205	0.314696	0
ENSG00000140937.12	0	-0.0411032	1
ENSG00000204469.11	0.418957	0.334174	0
ENSG00000131002.10	0	0.00745615	1
ENSG00000163466.14	0.51736	0.332564	0
ENSG00000115091.10	0.582954	0.389846	0
ENSG00000091129.18	0	0.0240467	1
ENSG00000125148.6	0.202976	0.182088	5.93858e-10
ENSG00000137076.17	0.204712	0.176548	2.95386e-22
ENSG00000114346.12	0.425862	0.313087	0
ENSG00000106483.10	-0.0348266	-0.0886049	0.0980999
ENSG00000168528.10	0.147994	0.12047	2.96799e-05
ENSG00000135069.12	0.326495	0.273284	9.52056e-41
ENSG00000265933.4	0	0.012078	1
ENSG00000203747.8	0.0281269	0.0948087	2.95569e-07
ENSG00000069275.12	0.549855	0.372496	0
ENSG00000007062.10	0	-0.043623	1
ENSG00000100304.12	0.349308	0.23879	0
ENSG00000168615.10	0.261349	0.196195	3.431e-12
ENSG00000128595.15	0.456082	0.363233	0
ENSG00000144824.18	0	0.0104074	1
ENSG00000125835.16	0.709977	0.48955	0
ENSG00000115484.13	0.72579	0.521472	0
ENSG00000111206.11	0.335205	0.255703	1.81643e-40
ENSG00000166165.11	0.154591	0.164019	1.01862e-05
ENSG00000182175.12	0.00436795	0.0395462	1
ENSG00000248527.1	0	0.0245508	1
ENSG00000160789.18	0.361561	0.275622	2.15005e-39
ENSG00000142102.14	0.0181432	0.0790981	1
ENSG00000110651.10	0.41809	0.288216	0
ENSG00000119335.15	0.662635	0.43871	0
ENSG00000277443.1	0.315628	0.217616	6.15242e-30
ENSG00000103485.16	0	0.0461207	1
ENSG00000251562.6	0	-0.00410671	1
ENSG00000128016.5	0.048659	0.0277295	1
ENSG00000131668.12	0.0258032	0.0821834	0.265956
ENSG00000130255.11	0.757674	0.594762	0
ENSG00000187193.8	0.170749	0.172383	1.64633e-16
ENSG00000172809.11	0.804425	0.601339	0
ENSG00000019549.7	0	0.03186	1
ENSG00000092820.16	0.360024	0.280524	5.40137e-34
ENSG00000018236.13	0	0.0238539	1
ENSG00000108654.10	0.506635	0.36799	0
ENSG00000158195.9	0.307301	0.212111	4.40527e-36
ENSG00000136689.17	0.00474178	0.0310706	1
ENSG00000124766.5	0.372558	0.343692	0
ENSG00000087128.8	0	0.0101402	1
ENSG00000052344.14	0.0975224	0.149096	8.58557e-09
ENSG00000014216.14	0.437952	0.30975	0
ENSG00000250722.4	0.0928534	0.0833184	1
ENSG00000149591.15	0.000502244	0.0481585	1
ENSG00000135862.5	0.280694	0.208313	5.55337e-28
ENSG00000213853.8	0.192095	0.130195	4.12122e-05
ENSG00000176619.9	0.331802	0.254879	0
ENSG00000162909.16	0.232665	0.202294	1.81353e-23
ENSG00000134184.11	0	-0.00146333	1
ENSG00000160710.14	0.454047	0.359396	0
ENSG00000113739.9	0.205237	0.164186	5.96044e-17
ENSG00000164032.10	0.663274	0.454001	0
ENSG00000088325.14	0.388354	0.32361	0
ENSG00000099725.13	0	-0.00144972	1
ENSG00000108582.10	0.27612	0.259452	3.52266e-22
ENSG00000105281.11	0.437129	0.310494	0
ENSG00000275410.3	-0.00638852	-0.0510765	0.0299905
ENSG00000114554.10	0.127395	0.104363	1.04812e-06
ENSG00000155066.14	0.056437	0.0490381	1
ENSG00000106546.11	0.19443	0.163267	1.67717e-09
ENSG00000163331.9	0	0.0188632	1
ENSG00000176597.10	0.212385	0.185249	1.34769e-23
ENSG00000136153.18	0.082428	0.0904797	0.00540717
ENSG00000104140.6	0.11781	0.123839	1.52932e-07
ENSG00000149418.9	0.364142	0.28413	2.11513e-31
ENSG00000177565.14	0.44824	0.319394	0
ENSG00000229807.8	-0.0407871	-0.100143	0.551673
ENSG00000075275.15	0.0555535	0.0573491	1
ENSG00000136830.10	0.346704	0.235613	8.16861e-30
ENSG00000188910.7	0	-0.00960194	1
ENSG00000111907.19	0.16084	0.16564	4.10409e-16
ENSG00000157404.14	0.0393749	0.0863957	0.5461
ENSG00000197565.14	0	-0.0640787	0.0318121
ENSG00000047936.9	-0.0936038	-0.14736	4.48715e-11
ENSG00000125398.5	0	-0.007611	1
ENSG00000072210.17	0.260184	0.214179	2.08644e-22
ENSG00000139289.12	0.176501	0.143825	3.09237e-07
ENSG00000196262.12	0.722213	0.492276	0
ENSG00000092199.16	0.836041	0.548336	0
ENSG00000166147.12	-0.000591782	-0.04394	1
ENSG00000150991.13	0.555176	0.376251	0
ENSG00000111341.8	0	0.0155582	1
ENSG00000136002.15	0	0.0213281	1
ENSG00000090104.10	0.0154355	0.0870731	0.00337141
ENSG00000163032.10	0	0.00879209	1
ENSG00000165168.7	0	0.00947845	1
ENSG00000104904.11	0.680194	0.466966	0
ENSG00000133477.15	0	0.0416263	1
ENSG00000211941.3	0	-0.0373764	1
ENSG00000140105.16	0.345031	0.268562	2.97972e-24
ENSG00000163468.13	0.762882	0.551508	0
ENSG00000213639.8	0.668785	0.460656	0
ENSG00000105976.13	0.0808897	0.115663	0.933376
ENSG00000146555.17	0.00998705	0.0219186	1
ENSG00000006747.13	0	0.00640219	1
ENSG00000072110.12	0.204442	0.156566	1.37662e-18
ENSG00000143878.9	0.261947	0.234981	2.7119e-16
ENSG00000166670.8	-0.0117664	-0.0735996	0.360139
ENSG00000079308.15	0	-0.0464494	1
ENSG00000058262.8	0.535442	0.369822	0
ENSG00000162244.9	0.785846	0.639815	0
ENSG00000228253.1	0	0.0448795	1
ENSG00000067167.6	0.411686	0.37699	0
ENSG00000163453.10	0.180118	0.163437	1.56589e-12
ENSG00000211956.2	0	-0.0570934	0.0389807
ENSG00000066405.11	-0.0486147	-0.0976894	0.000333794
ENSG00000064042.16	0.0224688	0.0565311	1
ENSG00000065361.13	0.192857	0.217357	9.76071e-23
ENSG00000275395.3	0	-0.0856981	0.978525
ENSG00000182481.7	0.559475	0.404492	0
ENSG00000159335.14	0.427523	0.343154	0
ENSG00000140526.15	0.0722971	0.0603701	1
ENSG00000204257.13	0	0.0242505	1
ENSG00000134419.14	0.79355	0.630425	0
ENSG00000085063.13	0.278934	0.233359	1.95575e-25
ENSG00000029153.13	0.150025	0.143625	4.47398e-12
ENSG00000075426.10	0.227315	0.16773	2.74591e-16
ENSG00000006118.13	0.219551	0.187246	3.28121e-19
ENSG00000168453.13	0	-0.057388	0.0230615
ENSG00000010292.11	0.426242	0.315696	0
ENSG00000163975.10	0.122682	0.0927992	0.00787032
ENSG00000143870.11	0.60882	0.455926	0
ENSG00000205336.10	0.0916882	0.0792254	0.585227
ENSG00000131981.14	0.318619	0.259007	2.1705e-35
ENSG00000129116.16	0.108941	0.106814	4.38697e-07
ENSG00000237541.3	0	0.0118997	1
ENSG00000157601.12	0.0740314	0.0656407	1
ENSG00000186468.11	0.76098	0.609684	0
ENSG00000086598.9	0.698875	0.521579	0
ENSG00000132746.13	0.0401605	0.0649203	1
ENSG00000167244.16	0	-0.0250591	1
ENSG00000280411.1	0	-0.0554975	0.29041
ENSG00000118898.14	0.0258402	0.0282658	1
ENSG00000110799.12	0	-0.0327336	1
ENSG00000170027.6	0.508744	0.358269	0
ENSG00000100644.15	0.364054	0.273626	2.40839e-38
ENSG00000211950.2	0	-0.0565958	0.302046
ENSG00000029993.13	0.440874	0.412039	0
ENSG00000198242.12	0.819206	0.620357	0
ENSG00000168394.10	0.300508	0.249119	1.17645e-31
ENSG00000105974.10	0.0351692	0.0412411	1
ENSG00000211962.2	0	-0.0338934	1
ENSG00000168003.15	0.387893	0.288262	0
ENSG00000141367.10	0.531145	0.41099	0
ENSG00000131771.12	0	0.0560767	1
ENSG00000167183.2	0	0.0417944	1
ENSG00000090530.8	0	-0.00964195	1
ENSG00000166508.16	0.597446	0.430978	0
ENSG00000130513.6	0	0.0435768	1
ENSG00000173376.12	-0.0252326	-0.0764505	0.00135313
ENSG00000221983.6	0.734486	0.547008	0
ENSG00000177575.11	0	0.0279755	1
ENSG00000143321.17	0.664597	0.500477	0
ENSG00000143365.15	0	0.0231843	1
ENSG00000146166.15	0	-0.0331388	1
ENSG00000104738.15	0.500723	0.380481	0
ENSG00000152583.11	0.0714105	0.053662	1
ENSG00000130726.10	0.536285	0.42103	0
ENSG00000107796.11	0	0.00283945	1
ENSG00000211669.2	0	0.000200245	1
ENSG00000110958.14	0.765768	0.52	0
ENSG00000169604.18	0.0276677	0.0566176	1
ENSG00000138271.5	0	0.00626583	1
ENSG00000171560.13	0	0.00321296	1
ENSG00000091136.12	0.0885845	0.0895504	0.00436935
ENSG00000188906.12	0	-0.0381588	1
ENSG00000135486.16	0.729186	0.556075	0
ENSG00000143126.7	0.0816407	0.102357	1.36237e-07
ENSG00000166923.9	0	0.0325897	1
ENSG00000133048.11	0.0124939	0.0385515	1
ENSG00000197102.9	0.339704	0.255719	1.47412e-35
ENSG00000179178.9	0.0156287	0.0740225	9.1629e-06
ENSG00000137642.11	0.0984141	0.0965377	0.397488
ENSG00000135919.11	0.0509876	0.0673598	1
ENSG00000121579.11	0.468826	0.320427	0
ENSG00000186529.13	0	-0.0491688	0.972255
ENSG00000135318.10	0	0.0217909	1
ENSG00000124664.9	0	-0.0065248	1
ENSG00000075785.11	0.510168	0.325519	0
ENSG00000159403.14	0.102218	0.073736	0.082221
ENSG00000143761.12	0.651617	0.473831	0
ENSG00000173821.18	0.133709	0.126675	9.15074e-05
ENSG00000009307.14	0.583059	0.437561	0
ENSG00000185215.7	0.0282932	0.0379534	1
ENSG00000143061.16	0.108975	0.0820763	0.0117164
ENSG00000125285.5	0	-0.0272223	1
ENSG00000132386.9	0.0495208	0.0528171	1
ENSG00000152952.10	0.2881	0.268453	2.31439e-23
ENSG00000173467.7	-0.00482159	-0.0369296	1
ENSG00000135052.15	0.240569	0.215887	3.27651e-21
ENSG00000114251.12	0.0344858	0.0476483	1
ENSG00000171658.7	0	-0.0517514	0.0103558
ENSG00000160862.11	0	0.000221586	1
ENSG00000003436.13	0	0.0675691	1
ENSG00000066468.19	0	0.00892497	1
ENSG00000121039.8	0.275291	0.222154	4.55586e-13
ENSG00000163131.9	0.0614467	0.0982559	3.45566e-07
ENSG00000211947.2	0	-0.0213015	1
ENSG00000168036.15	0.498142	0.421924	0
ENSG00000113657.11	0.119706	0.115824	0.00607396
ENSG00000165119.17	0.724933	0.492792	0
ENSG00000142871.14	0	-0.00526559	1
ENSG00000130707.16	0.276216	0.244969	2.10014e-15
ENSG00000112972.13	0.239701	0.194943	3.90313e-21
ENSG00000164687.9	0.0786538	0.111227	0.00010832
ENSG00000134107.4	0.23897	0.180023	5.65379e-13
ENSG00000197930.11	0.294581	0.233085	4.84126e-26
ENSG00000137745.10	0	-0.0811074	1
ENSG00000074416.12	0	-0.0377718	1
ENSG00000109861.14	0.372606	0.289659	3.33791e-28
ENSG00000003989.15	0	0.0282792	1
ENSG00000139318.7	0.0932558	0.140023	2.70529e-06
ENSG00000091986.14	0	-0.0492598	1
ENSG00000268104.2	0	-0.0370882	1
ENSG00000270550.1	0	-0.0256817	1
ENSG00000144810.14	-0.0122578	-0.0571862	1
ENSG00000129451.10	0	-0.0169605	1
ENSG00000155660.9	0.465366	0.405932	0
ENSG00000132002.6	0.455813	0.324593	0
ENSG00000102287.15	0	-0.098434	0.157498
ENSG00000175061.16	0.734272	0.617387	0
ENSG00000196562.13	0	0.0136447	1
ENSG00000102007.9	0.465978	0.353519	0
ENSG00000136167.12	0.0748075	0.0869517	0.0155929
ENSG00000182379.9	0.112869	0.105994	2.41836e-07
ENSG00000108518.7	0.709384	0.502759	0
ENSG00000090776.5	0.0317447	0.0345878	1
ENSG00000109472.12	0.147628	0.191438	2.78732e-07
ENSG00000116016.12	0.109669	0.127943	7.43486e-05
ENSG00000170017.11	0.275021	0.248237	5.72727e-14
ENSG00000163902.10	0.68104	0.46477	0
ENSG00000171867.15	0.201431	0.181848	1.77327e-22
ENSG00000188229.5	0.543888	0.393561	0
ENSG00000260314.2	0	-0.0476035	1
ENSG00000185650.9	0.266478	0.2183	2.65184e-19
ENSG00000117525.12	0.0777392	0.1006	0.436532
ENSG00000211648.2	0	-0.0161158	1
ENSG00000125740.12	0	-0.0887658	1
ENSG00000101444.11	0.733171	0.550794	0
ENSG00000177156.9	0.467761	0.33947	0
ENSG00000244437.1	0	-0.00190697	1
ENSG00000082641.14	0.327898	0.238081	1.49378e-42
ENSG00000116044.14	0.288371	0.215864	2.96534e-34
ENSG00000169474.4	0	-0.0165535	1
ENSG00000130294.13	0	0.0274354	1
ENSG00000211673.2	0	0.00534566	1
ENSG00000164308.15	0	0.0380055	1
ENSG00000196531.9	0.804535	0.596013	0
ENSG00000162366.6	0	-0.0404315	1
ENSG00000164171.9	0	0.0411664	1
ENSG00000110092.3	0.194547	0.204897	3.30788e-06
ENSG00000166535.18	0	-0.0308771	1
ENSG00000167757.12	0	0.00210781	1
ENSG00000118680.11	0.679926	0.47225	0
ENSG00000211934.3	0	-0.0603422	1
ENSG00000161011.18	0.362293	0.251602	6.99545e-36
ENSG00000160180.15	0	0.0496526	1
ENSG00000162551.12	0.00201058	-0.00152971	1
ENSG00000163682.14	0.770825	0.678191	0
ENSG00000164120.12	0	-0.00964613	1
ENSG00000102265.10	0.210312	0.2293	2.80659e-18
ENSG00000105357.14	0.0523299	0.0501934	1
ENSG00000104368.16	0	-0.013881	1
ENSG00000100985.7	0	-0.0162536	1
ENSG00000198561.11	0.369713	0.285117	0
ENSG00000119681.10	0	-0.0654735	0.639679
ENSG00000122566.19	0.51272	0.423854	0
ENSG00000189280.3	0	-0.0233477	1
ENSG00000132475.7	0.613363	0.48718	0
ENSG00000163430.8	0.0932344	0.106097	4.22827e-05
ENSG00000030582.15	0.324509	0.248285	2.46136e-32
ENSG00000118523.5	0	-0.0243831	1
ENSG00000135404.10	0.49894	0.434006	0
ENSG00000105223.17	0.351157	0.286253	9.27953e-22
ENSG00000171858.16	0.793752	0.692682	0
ENSG00000167165.17	0	-0.0553091	1
ENSG00000139926.14	0.0123504	0.0751564	2.66329e-06
ENSG00000108352.10	0	0.0477229	1
ENSG00000140519.11	0	-0.00543603	1
ENSG00000172270.17	0.607541	0.488098	0
ENSG00000115677.15	0.425918	0.369764	0
ENSG00000160255.15	0	0.0127141	1
ENSG00000163565.17	0.18511	0.166899	1.70563e-12
ENSG00000070526.13	0	-0.026246	1
ENSG00000196576.13	0.171156	0.152674	4.17881e-09
ENSG00000174748.17	0.793564	0.674767	0
ENSG00000133063.14	-0.0112222	-0.109927	0.00965589
ENSG00000138449.9	0.0927569	0.119314	0.00360046
ENSG00000089009.14	0.801999	0.639979	0
ENSG00000137673.7	-0.0495438	-0.141454	0.0013501
ENSG00000132341.10	0.763845	0.574608	0
ENSG00000198911.10	0.336359	0.246845	2.26506e-41
ENSG00000169100.11	0.664896	0.541453	0
ENSG00000184012.10	0	-0.055155	1
ENSG00000156482.9	0.816919	0.709686	0
ENSG00000105640.11	0.73411	0.620466	0
ENSG00000134308.12	0.664036	0.518788	0
ENSG00000115221.9	0	0.0205563	1
ENSG00000257017.7	0	0.00255379	1
ENSG00000117632.19	0.557757	0.465329	0
ENSG00000069011.14	0.105144	0.165146	1.31201e-07
ENSG00000159228.11	0.264636	0.25586	5.62497e-18
ENSG00000136997.13	0.342911	0.282503	1.83569e-35
ENSG00000112715.19	0.29423	0.297782	3.56776e-26
ENSG00000150093.17	0.360994	0.332443	0
ENSG00000116260.15	0.225732	0.216714	5.65632e-19
ENSG00000212907.2	0.0967758	0.114002	1.15426e-10
ENSG00000163207.6	-0.00396518	-0.0889085	0.00993176
ENSG00000211445.10	0.0646294	0.0715518	1
ENSG00000092841.17	0.704414	0.589619	0
ENSG00000145425.8	0.804213	0.724398	0
ENSG00000174437.15	0.400335	0.322932	0
ENSG00000170889.12	0.799763	0.697028	0
ENSG00000211943.2	0	-0.0264287	1
ENSG00000089597.15	0.56366	0.452487	0
ENSG00000070731.8	0.0203123	0.0392696	1
ENSG00000064655.17	0	0.00172126	1
ENSG00000035862.11	0	0.0176505	1
ENSG00000134247.9	0.147454	0.132728	1.90546e-13
ENSG00000107159.11	0	0.0529476	1
ENSG00000083857.12	0.153788	0.14943	4.72063e-05
ENSG00000177600.7	0.765692	0.640888	0
ENSG00000197756.8	0.818394	0.71235	0
ENSG00000174469.16	0	0.0116969	1
ENSG00000189060.5	0.472369	0.392473	0
ENSG00000159166.12	0.177357	0.156742	3.12556e-11
ENSG00000130066.15	0.331412	0.281744	2.58704e-21
ENSG00000196419.11	0.697498	0.484227	0
ENSG00000134294.12	0.401969	0.329171	0
ENSG00000121064.11	0.285548	0.209505	6.04104e-15
ENSG00000108107.11	0.715765	0.602333	0
ENSG00000124145.6	0.323401	0.321422	8.27439e-37
ENSG00000120129.5	0.0820383	0.0991074	0.296318
ENSG00000173812.9	0.720365	0.542147	0
ENSG00000133636.9	0.0172242	0.068876	1
ENSG00000247627.2	0	-0.0426627	1
ENSG00000166415.13	0.090728	0.123938	0.00360956
ENSG00000105855.8	0	0.0299886	1
ENSG00000167656.4	0	-0.0324794	1
ENSG00000169594.11	0	-0.0483504	0.00973405
ENSG00000142973.11	0	-0.0565138	1
ENSG00000144713.11	0.819495	0.74052	0
ENSG00000022556.14	0	-0.0475907	1
ENSG00000134531.8	0.135512	0.126626	1.78758e-05
ENSG00000019186.8	0	0.026605	1
ENSG00000142089.14	0.368317	0.326975	6.11983e-35
ENSG00000167553.13	0.547555	0.416775	0
ENSG00000141756.17	0.171603	0.200268	1.45757e-09
ENSG00000100097.10	0.239214	0.242485	1.92138e-24
ENSG00000136810.11	0.416596	0.339244	0
ENSG00000173372.15	0.101433	0.117008	4.96779e-10
ENSG00000104341.15	0.52847	0.454149	0
ENSG00000118705.15	0.595802	0.457747	0
ENSG00000004478.7	0.558232	0.422068	0
ENSG00000149131.14	0.0288005	0.0422796	1
ENSG00000005022.5	0.693455	0.548955	0
ENSG00000162738.5	0.0390553	0.0564346	1
ENSG00000181163.12	0.80972	0.637056	0
ENSG00000131711.13	0	0.0200029	1
ENSG00000169714.15	0.671181	0.476275	0
ENSG00000006210.6	0	-0.00427673	1
ENSG00000039068.17	0.33219	0.294016	3.48388e-26
ENSG00000163216.6	0	-0.0127134	1
ENSG00000211640.3	0	-0.0186443	1
ENSG00000147065.15	0.294887	0.257739	2.0074e-23
ENSG00000148926.8	0.118483	0.122349	5.85774e-06
ENSG00000143933.15	0.728747	0.602693	0
ENSG00000168209.4	0.271753	0.274964	1.6387e-20
ENSG00000133392.15	-0.0638485	-0.199272	4.73631e-09
ENSG00000065978.16	0.639913	0.523849	0
ENSG00000144381.15	0.703744	0.554811	0
ENSG00000073111.12	0.445116	0.355791	0
ENSG00000073756.10	0	0.0802267	1
ENSG00000224373.3	-0.0153878	-0.0789629	1.53683e-06
ENSG00000275385.1	0.0308869	0.0384929	1
ENSG00000265190.5	0	-0.0487649	0.143044
ENSG00000074211.12	0	0.0163649	1
ENSG00000161202.16	0.272367	0.220995	0
ENSG00000168028.12	0.826161	0.729882	0
ENSG00000123416.14	0.643766	0.511422	0
ENSG00000204544.5	-0.0187644	-0.060744	1
ENSG00000060138.11	0.425547	0.343049	0
ENSG00000198755.9	0.838509	0.733959	0
ENSG00000196352.12	0.150161	0.183818	1.43078e-09
ENSG00000143947.11	0.791693	0.668516	0
ENSG00000101210.9	0	0.0478352	1
ENSG00000152558.13	0.551764	0.422926	0
ENSG00000130303.11	0.13975	0.160107	5.70939e-06
ENSG00000130508.9	0.00866405	0.0450145	1
ENSG00000108953.15	0.758953	0.576687	0
ENSG00000127022.13	0.585989	0.511594	0
ENSG00000211668.2	0	-0.0137583	1
ENSG00000143375.13	0.0215252	0.0699077	1
ENSG00000100979.13	0.261446	0.20813	1.20763e-10
ENSG00000167978.15	0.15893	0.158861	2.57536e-09
ENSG00000134824.12	0.237427	0.220716	4.08039e-13
ENSG00000134755.13	0.145479	0.179202	4.03509e-12
ENSG00000006534.14	0	-0.0206	1
ENSG00000197958.11	0.793932	0.691622	0
ENSG00000241794.1	0	-0.00628644	1
ENSG00000131747.13	0.456993	0.418947	0
ENSG00000188157.12	0.155077	0.155695	2.50908e-06
ENSG00000159189.10	0.120742	0.141689	9.21084e-15
ENSG00000110492.14	0.387718	0.374033	6.49435e-26
ENSG00000187498.13	0.136237	0.143288	6.39607e-10
ENSG00000132821.10	0	0.0234672	1
ENSG00000150753.10	0.627243	0.518786	0
ENSG00000163435.14	0.245599	0.269712	3.8244e-21
ENSG00000164587.10	0.802326	0.748518	0
ENSG00000147257.12	0.0616257	0.0693697	1
ENSG00000141753.6	0.245943	0.201893	6.5558e-14
ENSG00000123384.12	0	-0.0246538	1
ENSG00000008394.11	0.222502	0.289546	4.00169e-17
ENSG00000132507.16	0.712237	0.537371	0
ENSG00000197747.7	0.329043	0.28771	4.1265e-27
ENSG00000169116.10	0.00583621	0.0571016	1
ENSG00000130702.12	0.0803988	0.108244	0.0224952
ENSG00000147604.12	0.80043	0.715475	0
ENSG00000114391.11	0.803993	0.709321	0
ENSG00000159399.8	0.181782	0.179629	4.10528e-11
ENSG00000153292.14	0	-0.0647905	1
ENSG00000149948.12	0	0.0187185	1
ENSG00000187514.13	0.752332	0.631709	0
ENSG00000167004.11	0.481914	0.419599	0
ENSG00000147676.12	0.35494	0.384475	1.41606e-30
ENSG00000101825.7	-0.00961733	-0.0930083	0.000376301
ENSG00000162511.7	0.101951	0.123088	4.63642e-15
ENSG00000111319.11	0.0889798	0.154473	0.008299
ENSG00000125691.11	0.796552	0.660477	0
ENSG00000166441.11	0.817011	0.753333	0
ENSG00000149212.9	0.0982895	0.094972	0.0705092
ENSG00000105825.10	0	0.0751419	1
ENSG00000253729.6	0.450072	0.390447	0
ENSG00000071082.9	0.829633	0.753838	0
ENSG00000185686.16	0.12016	0.1417	0.0252936
ENSG00000063177.11	0.792244	0.674665	0
ENSG00000129521.12	0.114451	0.147197	0.000267353
ENSG00000243955.4	0	-0.000540612	1
ENSG00000134363.10	0.0371487	0.0686462	1
ENSG00000134871.16	0.0985817	0.103228	0.00378851
ENSG00000112096.15	0.247923	0.223913	3.26131e-18
ENSG00000106366.8	0.0149684	0.0615567	1
ENSG00000171885.12	0	0.0127734	1
ENSG00000167460.13	0.386193	0.333992	0
ENSG00000136942.13	0.776685	0.668688	0
ENSG00000077942.16	0	0.00914257	1
ENSG00000262406.2	0.120773	0.154137	6.2083e-07
ENSG00000008988.8	0.765191	0.733221	0
ENSG00000115053.14	0.516071	0.44821	0
ENSG00000130402.10	0.317798	0.271354	5.14555e-29
ENSG00000172757.11	0.64762	0.532639	0
ENSG00000253755.1	0	-0.0198644	1
ENSG00000187244.9	0.104528	0.165306	0.000428477
ENSG00000147889.15	0.0490501	0.0854327	1
ENSG00000211959.2	0	-0.0436521	1
ENSG00000137573.12	0	0.0457143	1
ENSG00000169710.6	0.319701	0.351889	9.73977e-32
ENSG00000073792.14	0.103679	0.12059	0.00304789
ENSG00000092621.10	0.29298	0.25723	1.66926e-25
ENSG00000177954.10	0.792771	0.717598	0
ENSG00000142798.15	0	-0.0804468	1
ENSG00000151012.12	0.0382398	0.0869361	0.0127746
ENSG00000211459.2	0.226231	0.230077	1.02548e-11
ENSG00000196344.10	0	-0.073088	0.00113535
ENSG00000189143.9	0.293228	0.297082	1.06673e-21
ENSG00000105835.10	0.369747	0.359634	3.32028e-34
ENSG00000103811.14	0.0809041	0.134066	0.00112123
ENSG00000119655.7	0.195733	0.233444	1.98233e-20
ENSG00000148180.15	0.22717	0.180996	3.44843e-09
ENSG00000112306.7	0.774553	0.731641	0
ENSG00000103222.17	0.0963213	0.0895756	0.00737997
ENSG00000160932.9	0.314141	0.309019	9.03574e-22
ENSG00000099994.10	0	-0.0478285	1
ENSG00000169429.9	0.183512	0.216691	7.74197e-14
ENSG00000156976.13	0.579476	0.505903	0
ENSG00000117472.8	0	0.0334187	1
ENSG00000146648.14	0.101346	0.133261	0.0621369
ENSG00000182774.9	0.765192	0.699097	0
ENSG00000135678.10	0	0.00545301	1
ENSG00000167642.11	0.46393	0.416664	1.4013e-44
ENSG00000131469.11	0.847921	0.783449	0
ENSG00000115415.17	0.357228	0.330807	2.2262e-34
ENSG00000092068.17	0	0.00391382	1
ENSG00000120738.7	0.0565065	0.0486045	1
ENSG00000117450.12	0.50497	0.420736	0
ENSG00000103534.15	0	-0.0059532	1
ENSG00000163931.14	0.509407	0.469585	0
ENSG00000188153.11	0	-0.0220043	1
ENSG00000044574.7	0.548517	0.4757	0
ENSG00000211949.3	0	-0.020166	1
ENSG00000163209.13	0	-0.0315182	1
ENSG00000143416.19	0	0.0239094	1
ENSG00000204262.10	0	0.0132022	1
ENSG00000138326.17	0.765379	0.731591	0
ENSG00000171603.15	0.226441	0.209024	5.00143e-28
ENSG00000157227.11	0.158944	0.168138	1.37887e-17
ENSG00000179869.13	0	-0.0853115	0.338457
ENSG00000121858.9	0.178128	0.195477	1.85816e-10
ENSG00000126709.13	0.145499	0.175687	0.000174449
ENSG00000057149.13	-0.0108539	-0.0662143	1
ENSG00000203697.10	-0.0602632	-0.0998617	1.1452e-05
ENSG00000102554.12	0.212073	0.199662	1.94637e-19
ENSG00000100342.19	0.0646805	0.0558777	1
ENSG00000197641.10	0	-0.0527986	0.151526
ENSG00000171863.11	0.85508	0.82227	0
ENSG00000119888.9	0.467974	0.476501	0
ENSG00000178919.8	0	-0.0278185	1
ENSG00000068650.17	0.0489284	0.0878935	0.0596459
ENSG00000167526.12	0.753013	0.702229	0
ENSG00000229415.8	0	-0.00700998	1
ENSG00000046604.11	0.388552	0.405305	1.17709e-43
ENSG00000060718.17	0	-0.0437528	1
ENSG00000144476.5	0.0652507	0.0951658	0.0460237
ENSG00000139644.11	0.643535	0.56983	0
ENSG00000182326.13	0.0345572	0.0564186	1
ENSG00000170465.9	0	-0.0343623	1
ENSG00000138755.5	0.0263863	0.100895	0.108564
ENSG00000211651.3	0	-0.0412871	1
ENSG00000136156.11	0.45388	0.340159	5.74532e-44
ENSG00000122406.11	0.838689	0.805472	0
ENSG00000116285.11	0.192792	0.253013	1.41969e-21
ENSG00000162981.13	0.0926068	0.104682	0.00108612
ENSG00000173369.14	0.102918	0.128881	2.14941e-09
ENSG00000026025.12	0.129084	0.174555	1.42715e-14
ENSG00000185033.13	0.252956	0.22913	6.40264e-21
ENSG00000166598.11	0.541951	0.538833	0
ENSG00000140988.14	0.770073	0.717761	0
ENSG00000197635.8	0	-0.00979861	1
ENSG00000137440.4	0	-0.0118512	1
ENSG00000211945.2	0	-0.0359043	1
ENSG00000109062.8	0.194227	0.18306	8.11842e-18
ENSG00000143153.11	0.127003	0.172123	3.35107e-05
ENSG00000053747.14	0	-0.0748723	1
ENSG00000211644.2	0	-0.0418082	1
ENSG00000118515.10	0.178202	0.164929	5.33136e-09
ENSG00000099953.8	0	0.0159327	1
ENSG00000256612.6	-0.0869412	-0.144879	4.23425e-10
ENSG00000171903.15	0	-0.0206859	1
ENSG00000204628.10	0.770862	0.73035	0
ENSG00000084234.15	0.296329	0.31031	6.4647e-28
ENSG00000143819.11	0.197436	0.221514	1.08049e-12
ENSG00000197142.9	0	0.000220118	1
ENSG00000181143.14	0	-0.0473426	1
ENSG00000142937.10	0.851252	0.864698	0
ENSG00000130203.8	0.120806	0.160411	1.05693e-05
ENSG00000158710.13	0.575273	0.550692	0
ENSG00000074181.7	0.168063	0.168213	1.90222e-09
ENSG00000170345.8	0.0354685	0.0343404	1
ENSG00000124102.4	0	-0.0248623	1
ENSG00000198959.10	0.0388456	0.0790909	1
ENSG00000240583.9	0	0.0377471	1
ENSG00000178209.13	0.0658696	0.0793534	1
ENSG00000198840.2	0.187297	0.236922	5.03309e-25
ENSG00000211659.2	0	0.0308438	1
ENSG00000111799.19	-0.00151917	-0.081981	0.192087
ENSG00000211660.3	0	0.0116668	1
ENSG00000160213.5	0.332643	0.286942	4.30428e-28
ENSG00000083845.7	0.814167	0.799534	0
ENSG00000142949.15	0.334584	0.344545	1.07835e-39
ENSG00000142156.13	0	0.00586535	1
ENSG00000160211.14	0.265828	0.23775	2.48282e-27
ENSG00000105193.7	0.758038	0.761546	0
ENSG00000186340.13	0	-0.0177577	1
ENSG00000182795.12	0	-0.0583677	1
ENSG00000069122.17	0	-0.0197163	1
ENSG00000272398.4	0.200701	0.237748	4.2881e-05
ENSG00000204580.10	0.335179	0.310704	5.23609e-41
ENSG00000116133.10	0.331587	0.303239	3.27895e-24
ENSG00000188643.9	0.244326	0.234168	3.61495e-21
ENSG00000111057.9	0.439091	0.47289	0
ENSG00000198363.14	0.327066	0.329315	1.47053e-20
ENSG00000090339.7	0.0106113	0.0727383	1
ENSG00000147689.15	0.0164808	0.073146	1
ENSG00000127954.11	0	0.000148933	1
ENSG00000116299.15	0	0.0726062	1
ENSG00000108298.8	0.810423	0.747626	0
ENSG00000159212.11	0	-0.0508621	1
ENSG00000156535.12	0	0.0411432	1
ENSG00000176907.4	0.0990943	0.136473	0.00840668
ENSG00000211653.2	0	-0.0373729	1
ENSG00000185633.9	0.167211	0.189527	2.05325e-08
ENSG00000204592.8	0.297527	0.258505	2.40883e-42
ENSG00000110955.7	0.724708	0.620951	0
ENSG00000122861.14	0.0469647	0.0978584	0.109607
ENSG00000115648.12	0	-0.0447077	1
ENSG00000096088.15	-0.0280418	-0.0756176	1
ENSG00000111716.11	0.513928	0.541983	2.8026e-45
ENSG00000196735.10	0	0.0212117	1
ENSG00000120708.15	0.105365	0.152266	2.23261e-06
ENSG00000038427.14	0	0.0362903	1
ENSG00000169908.9	0.305215	0.298601	1.27049e-16
ENSG00000189334.7	0.146199	0.211848	5.76328e-06
ENSG00000135821.15	0.35436	0.326174	1.82564e-25
ENSG00000167600.12	0	-0.0318721	1
ENSG00000115758.11	0.462227	0.521726	0
ENSG00000204385.9	0	-0.0368005	1
ENSG00000137309.18	0.567098	0.53222	0
ENSG00000161055.3	-0.027603	-0.0694495	1
ENSG00000123838.9	-0.000698021	-0.0382392	1
ENSG00000211898.6	-0.00208788	-0.0673586	1
ENSG00000242265.4	0.219816	0.279606	7.47383e-11
ENSG00000108679.11	0.293178	0.344199	4.2105e-21
ENSG00000145423.4	0	-0.0700468	1
ENSG00000165215.6	0.0466986	0.0903218	0.0907387
ENSG00000062038.12	0.103811	0.163461	1.03398e-06
ENSG00000179344.15	0	0.0253269	1
ENSG00000110321.14	0.630433	0.568041	0
ENSG00000114770.15	0.0983738	0.127931	2.80418e-08
ENSG00000110195.10	0	-0.0075276	1
ENSG00000120885.18	0	-0.00997284	1
ENSG00000175166.15	0.471801	0.428209	0
ENSG00000155380.10	0.160057	0.178322	1.29228e-18
ENSG00000183347.14	0	-0.034407	1
ENSG00000068078.16	0	0.00813349	1
ENSG00000254709.5	0	0.00072752	1
ENSG00000185624.13	0.549311	0.546009	0
ENSG00000198034.9	0.790418	0.829408	0
ENSG00000048540.13	0	0.0470279	1
ENSG00000211663.2	0	0.001849	1
ENSG00000163399.14	0.424068	0.415543	1.12104e-44
ENSG00000179218.12	0.6539	0.62408	0
ENSG00000259803.5	0	-0.0352881	1
ENSG00000142534.5	0.818922	0.833546	0
ENSG00000198502.5	0	0.0364824	1
ENSG00000211666.2	0	0.0314588	1
ENSG00000105220.13	0.469003	0.463224	0
ENSG00000145592.12	0.751006	0.743572	0
ENSG00000148346.10	0	-0.0522106	1
ENSG00000185567.6	0	-0.081538	1
ENSG00000149021.5	-0.0306795	-0.119999	0.217805
ENSG00000087245.11	0	-0.115869	2.17485e-07
ENSG00000012223.11	0	-0.070162	1
ENSG00000130635.14	0	-0.0907557	1.97058e-06
ENSG00000005884.16	0.0961247	0.129288	0.00833659
ENSG00000106624.7	0	-0.095175	0.000339267
ENSG00000134333.12	0.636011	0.652747	0
ENSG00000189377.7	0	-0.0274901	1
ENSG00000161203.12	0.446037	0.412515	0
ENSG00000117595.9	0.222975	0.229648	9.32328e-29
ENSG00000137801.10	0.014756	0.0811292	1
ENSG00000114867.18	0.380343	0.390303	0
ENSG00000167996.14	0.51557	0.445152	0
ENSG00000196188.9	-0.0256074	-0.078283	1
ENSG00000147403.15	0.792322	0.856052	0
ENSG00000105372.5	0.757824	0.790111	0
ENSG00000182899.13	0.734772	0.732956	0
ENSG00000102144.12	0.646023	0.681405	0
ENSG00000133110.13	0.015658	0.0643931	1
ENSG00000265972.4	0.0591414	0.103539	0.752402
ENSG00000087460.22	0.604136	0.605309	0
ENSG00000148303.15	0.832344	0.841147	0
ENSG00000143320.7	0.0304293	0.0635413	1
ENSG00000121742.14	0	-0.000437717	1
ENSG00000143546.8	0.0185991	0.0683005	1
ENSG00000142192.19	0.370099	0.37186	4.29913e-39
ENSG00000142173.13	0	-0.00606118	1
ENSG00000223865.9	0.0316953	0.0768228	3.50674e-06
ENSG00000174444.13	0.79767	0.825684	0
ENSG00000108846.14	0	-0.0902059	0.941798
ENSG00000211966.2	0	-0.0401275	1
ENSG00000145113.20	0	-0.0587791	1
ENSG00000196260.3	0	0.00807242	1
ENSG00000184292.6	0.115058	0.158379	0.000402782
ENSG00000111669.13	0.676665	0.689457	0
ENSG00000101443.16	0.00147525	0.0718804	1
ENSG00000167972.12	0	-0.00459371	1
ENSG00000163191.5	0.385712	0.402654	0
ENSG00000142657.19	0.339045	0.345304	0
ENSG00000145824.11	0	-0.0281519	1
ENSG00000074410.12	0	-0.0338322	1
ENSG00000196611.4	0	-0.00960366	1
ENSG00000187908.14	-0.0287843	-0.114554	0.270927
ENSG00000069849.9	0.288629	0.292143	0
ENSG00000171476.20	0.0367013	0.142402	9.35087e-05
ENSG00000205542.9	0.484617	0.580888	0
ENSG00000124107.5	0.049681	0.077868	1
ENSG00000196230.11	0.584809	0.627322	0
ENSG00000198183.10	0	0.00721762	1
ENSG00000087494.14	0.0112009	0.0789655	0.246909
ENSG00000153446.14	0	-0.0297266	1
ENSG00000001084.9	0.192417	0.222718	1.70282e-13
ENSG00000198848.11	0	-0.075382	1
ENSG00000100316.14	0.816995	0.890123	0
ENSG00000129824.14	0.0407585	0.105118	1
ENSG00000101144.11	0	-0.0315612	1
ENSG00000026508.15	0.197364	0.206308	2.63601e-13
ENSG00000109971.12	0.650724	0.710278	0
ENSG00000034510.5	0.626681	0.693159	0
ENSG00000142541.15	0.81442	0.907383	0
ENSG00000149273.13	0.853652	0.993028	0
ENSG00000070087.12	0.415059	0.438726	0
ENSG00000131746.11	0	-0.0282076	1
ENSG00000096384.18	0.670776	0.749722	0
ENSG00000121552.3	0.0014481	0.0570449	1
ENSG00000129538.12	0.0553304	0.0921846	1
ENSG00000084207.14	0.529779	0.560087	0
ENSG00000196878.11	0.0262833	0.0515772	1
ENSG00000182492.14	0	-0.0175797	1
ENSG00000211662.2	0	0.0528778	1
ENSG00000103257.7	0.288126	0.302712	1.57259e-21
ENSG00000117984.11	0.242125	0.276683	2.81567e-25
ENSG00000169469.8	0	-0.0173935	1
ENSG00000080824.17	0.655665	0.680442	0
ENSG00000164924.16	0.661511	0.675351	0
ENSG00000170421.10	0.468497	0.599129	0
ENSG00000011465.15	0.0330789	0.0870232	1
ENSG00000137648.15	0	0.0170399	1
ENSG00000245532.5	0	-0.0144245	1
ENSG00000171557.15	0.00404596	0.100359	1
ENSG00000198695.2	-0.0300591	-0.107046	0.0901494
ENSG00000133661.14	0	-0.0310054	1
ENSG00000124942.12	0	0.00162404	1
ENSG00000103044.9	0	-0.0211645	1
ENSG00000165092.11	0.0457484	0.0700215	1
ENSG00000165474.5	0	0.0181186	1
ENSG00000148053.14	0	-0.0537235	1
ENSG00000211679.2	0.00176588	0.0419356	1
ENSG00000272620.1	-0.0108135	-0.0825646	1
ENSG00000198431.14	0.270217	0.366868	1.13754e-37
ENSG00000124466.8	0.0353502	0.0572257	1
ENSG00000135046.12	0.183017	0.267919	6.19725e-10
ENSG00000013588.5	0	0.0487428	1
ENSG00000100345.19	0.229577	0.282682	1.15635e-27
ENSG00000099194.5	0.422255	0.464609	6.1286e-36
ENSG00000115461.4	0.129701	0.160405	0.0149628
ENSG00000243466.1	0.00140935	0.0828772	0.00027651
ENSG00000163993.6	0.0421263	0.120033	0.153258
ENSG00000137154.11	0.818849	0.994941	0
ENSG00000241351.2	0	0.057803	0.0141183
ENSG00000196924.13	0.207957	0.260128	4.60931e-15
ENSG00000151914.16	0.00464507	0.0189065	1
ENSG00000230937.8	0	-0.000888425	1
ENSG00000125999.9	0	-0.0415432	1
ENSG00000106278.10	0	-0.044673	1
ENSG00000164265.7	0	0.00918097	1
ENSG00000231389.6	0.039457	0.104014	2.64004e-07
ENSG00000137818.10	0.729516	0.850106	0
ENSG00000211890.3	-0.00318463	-0.114392	0.131693
ENSG00000182718.15	0.404705	0.438439	0
ENSG00000171401.13	0	0.0138405	1
ENSG00000132470.12	0.0589751	0.0867621	1
ENSG00000137975.7	0	-0.0314491	1
ENSG00000206503.10	0.304238	0.381542	4.36481e-29
ENSG00000152661.7	0.0931436	0.140769	0.000669082
ENSG00000181019.11	0.125571	0.229754	1.37885e-16
ENSG00000115884.9	0.242793	0.291213	9.71213e-18
ENSG00000136352.16	0	0.0112961	1
ENSG00000165949.11	0.142174	0.197891	0.00122788
ENSG00000239951.1	0	0.0525937	0.759016
ENSG00000161016.14	0.843519	1.07445	0
ENSG00000163359.14	0	-0.08416	0.00313493
ENSG00000149925.15	0.605143	0.706846	0
ENSG00000139329.4	0.0458071	0.0936683	1
ENSG00000047457.12	0.0241552	0.106462	1
ENSG00000091409.13	0.103815	0.135288	3.49533e-05
ENSG00000204525.13	0.289539	0.386409	1.38074e-34
ENSG00000075618.16	0.161244	0.195559	9.85131e-13
ENSG00000197956.8	0.334043	0.433775	1.14399e-30
ENSG00000070756.12	0.678801	0.847546	0
ENSG00000167658.14	0.670836	0.802547	0
ENSG00000173801.15	0.282127	0.342664	0
ENSG00000211677.2	0.00731959	0.0400809	1
ENSG00000211598.2	0.0111866	0.106115	1.22885e-05
ENSG00000175899.13	0	0.0275216	1
ENSG00000196126.9	0.0661045	0.127357	1.8074e-08
ENSG00000197746.12	0.484134	0.555966	0
ENSG00000154277.11	0.185619	0.23355	4.48874e-12
ENSG00000231500.5	0.886592	1.15585	0
ENSG00000063660.7	0.0491725	0.0574015	1
ENSG00000074800.12	0.664138	0.826105	0
ENSG00000106211.8	0.294807	0.365903	2.27214e-26
ENSG00000178363.4	0	0.0199707	1
ENSG00000075624.12	0.453948	0.578554	0
ENSG00000101384.10	0.11023	0.12619	1.413e-07
ENSG00000153395.8	0.157221	0.237424	4.47495e-13
ENSG00000058085.13	0	0.0115756	1
ENSG00000113140.9	0.150523	0.245007	9.50412e-20
ENSG00000090382.5	0	0.0628408	1
ENSG00000181449.3	0.00967803	0.0508182	1
ENSG00000089157.14	0.836849	1.04214	0
ENSG00000198786.2	0	0.0118268	1
ENSG00000198899.2	0.117682	0.184186	4.03901e-12
ENSG00000146674.13	0.189704	0.244237	1.76272e-05
ENSG00000133112.15	0.708864	0.954777	0
ENSG00000186847.5	0	-0.0113211	1
ENSG00000010278.10	0.409261	0.484679	0
ENSG00000198888.2	0.0946763	0.197402	3.09079e-08
ENSG00000130821.14	0.210428	0.260374	9.92336e-26
ENSG00000164733.19	0.300089	0.357823	1.42703e-26
ENSG00000206075.12	0	0.0298668	1
ENSG00000089356.15	0.112293	0.165404	0.000269202
ENSG00000165272.13	0.0419045	0.115222	1
ENSG00000086570.11	0	-0.0572092	1
ENSG00000125730.15	0.00596431	0.0119632	1
ENSG00000108602.16	0	-0.0515433	1
ENSG00000175793.11	0.181324	0.2353	2.29184e-15
ENSG00000072274.11	0.33445	0.437972	0
ENSG00000067225.16	0.583225	0.683306	0
ENSG00000198763.3	0.114318	0.243072	1.06758e-13
ENSG00000132465.9	0.0378546	0.154376	1.06348e-07
ENSG00000102854.13	0	-0.0591932	1
ENSG00000163347.5	0.113476	0.165694	0.0076332
ENSG00000197249.11	0.0161144	0.0779533	1
ENSG00000041982.13	0	0.0156981	1
ENSG00000106541.10	0.0309666	0.125898	1
ENSG00000162896.5	-0.101475	-0.216402	0.00015126
ENSG00000185479.5	0	-0.0413142	1
ENSG00000117983.16	-0.0231699	-0.115193	1
ENSG00000184009.8	0.705883	0.957667	0
ENSG00000065618.15	0	-0.0825653	1
ENSG00000198727.2	0.134574	0.242645	1.13129e-20
ENSG00000198712.1	0.231305	0.391636	0
ENSG00000198804.2	0	-0.0925674	1
ENSG00000198074.8	0	-0.0287015	1
ENSG00000096696.12	0.306693	0.511597	2.01757e-29
ENSG00000136235.14	0.0833572	0.116691	1
ENSG00000114270.14	0	-0.0518894	1
ENSG00000211892.3	0	-0.0250499	1
ENSG00000198886.2	0.039114	0.114785	0.359198
ENSG00000166710.16	0.397957	0.561922	0
ENSG00000204287.12	0.12559	0.263658	3.02337e-39
ENSG00000110400.9	0.0986532	0.162527	2.78366e-11
ENSG00000234745.8	0.242549	0.354877	2.09699e-26
ENSG00000134757.4	0	-0.0290379	1
ENSG00000196139.10	0.0374399	0.100476	0.160555
ENSG00000135480.13	0.0665761	0.159303	0.137995
ENSG00000198938.2	0.191826	0.332846	2.72229e-29
ENSG00000171345.12	0.213558	0.381814	3.93311e-11
ENSG00000211893.3	0.00607545	0.0352011	1
ENSG00000156508.16	0.813578	1.26863	0
ENSG00000185499.15	0	-0.0362579	1
ENSG00000115457.8	0.158298	0.241877	5.87331e-05
ENSG00000211897.6	0.0278008	0.0720254	1
ENSG00000104419.13	0.335789	0.521787	5.93185e-32
ENSG00000210082.2	0.278915	0.504158	2.78023e-23
ENSG00000171346.12	0.0374401	0.118165	1
ENSG00000118785.12	0.231702	0.403859	3.59539e-11
ENSG00000105388.13	-0.0462317	-0.142758	1
ENSG00000211899.6	0	0.0122581	1
ENSG00000134762.15	0	0.0518452	1
ENSG00000164692.16	0	0.00659123	1
ENSG00000163220.10	0.132904	0.253224	0.000198672
ENSG00000087086.12	0.487129	0.767253	0
ENSG00000196754.9	0.0449341	0.139446	0.0105672
ENSG00000186832.7	0	0.0154795	1
ENSG00000112378.11	0.318523	0.474267	0
ENSG00000176153.11	0	0.0249813	1
ENSG00000115414.17	0.0336221	0.124235	0.431849
ENSG00000117394.18	0.244798	0.426399	1.01202e-41
ENSG00000019582.13	0.109824	0.245399	5.63494e-20
ENSG00000187134.11	0.00563383	0.0682772	1
ENSG00000111640.13	0.630071	1.10823	0
ENSG00000168542.11	0.0199542	0.0819251	1
ENSG00000137699.15	0	-0.0159102	1
ENSG00000157765.10	0	0.00835717	1
ENSG00000073282.11	0	0.0315247	1
ENSG00000131400.6	0	0.00804012	1
ENSG00000108821.12	0	-0.0666555	1
ENSG00000168484.11	0	-0.0635915	1
ENSG00000086548.8	-0.0199987	-0.120113	1
ENSG00000151632.15	0.0237736	0.0834982	1
ENSG00000211895.4	0	-0.0796218	1
ENSG00000122852.13	0	0.0656105	1
ENSG00000081277.10	0	-4.1295e-05	1
ENSG00000211592.5	0.0914143	0.25343	1.58922e-32
ENSG00000185303.14	0	0.0691299	1
ENSG00000168878.15	0.0320373	0.197703	0.178538
ENSG00000211896.5	0.0956839	0.295655	2.44063e-12
ENSG00000128422.14	0.0364404	0.109208	1
ENSG00000205420.9	0.019736	0.111504	1
ENSG00000186081.10	6.56984e-06	0.054833	1

## Sheet: cn_Translation
Aberration	funcSFA Coefficient	OLS Coefficient	p
Gain0	0	0.00686709	1
Gain1	0	0.0388046	1
Gain2	0.13799	0.15996	0.0103774
Gain3	0.147839	0.167204	0.000563773
Gain4	0.0167612	0.0618972	1
Gain5	0.168676	0.184206	3.45845e-05
Gain6	0.116708	0.130315	0.0142712
Gain7	0.0939418	0.0947887	0.141347
Gain8	0	-0.00295835	1
Gain9	-0.065414	-0.0760899	1
Gain10	0.0732856	0.157869	0.631702
Gain11	0.0767934	0.164988	0.19487
Gain12	0.0727944	0.181788	1
Gain13	0.0606896	0.128583	1
Gain14	0	0.0196656	1
Gain15	0.0110158	0.0338479	1
Gain16	0.138598	0.204065	0.0830493
Gain17	0.123216	0.187852	0.453934
Gain18	0.120642	0.180996	0.322952
Gain19	0.128118	0.186517	0.115842
Gain20	0.139395	0.205894	0.0550047
Gain21	0.0304893	0.0801311	1
Gain22	0.0676146	0.0861116	1
Gain23	0	-0.0322051	1
Gain24	0.104078	0.136545	1
Gain25	0.05797	0.0942573	1
Gain26	0.0469828	0.107389	1
Gain27	0.0501599	0.113647	1
Gain28	0.068303	0.12365	1
Gain29	0.149881	0.207752	0.00201097
Gain30	0.150643	0.19081	0.000487546
Gain31	0.142878	0.203885	0.00116841
Gain32	0.195946	0.298541	2.72519e-06
Gain33	0	0.0424497	1
Gain34	0.0083299	0.0528419	1
Gain35	0.0359495	0.0798402	1
Gain36	-0.0280625	-0.0607819	1
Gain37	0.0753188	0.159552	1
Gain38	0.0427041	0.0775804	1
Gain39	0.0182915	0.0590183	1
Gain40	-0.041436	-0.0699477	1
Gain41	0.129931	0.159626	0.0584453
Gain42	0.101031	0.138013	0.751766
Gain43	0.115613	0.177127	0.728323
Gain44	0	0.0341038	1
Gain45	0.000383402	0.068322	1
Gain46	-0.0558402	-0.0667066	1
Gain47	0	-0.0158355	1
Gain48	0.0231145	0.079612	1
Gain49	0.00569338	0.053317	1
Gain50	0	0.0172937	1
Gain51	0.0480303	0.0814682	1
Gain52	0	-0.0170217	1
Gain53	0.139203	0.184587	0.00627993
Gain54	0.1145	0.115664	0.10766
Gain55	0.0796733	0.115164	1
Gain56	0.0394079	0.0557329	1
Gain57	0	0.0158282	1
Gain58	0	-0.045199	1
Gain59	0	-0.0346627	1
Gain60	-0.0546685	-0.0964383	1
Gain61	0.0936015	0.112498	1
Gain62	0.0668544	0.0856075	1
Gain63	0.145299	0.180568	0.00344895
Gain64	0.110003	0.142609	0.0845163
Gain65	0.11739	0.147839	0.0688719
Gain66	-0.0228328	-0.0798843	1
Gain67	0.0271082	0.0449455	1
Gain68	0.0136012	0.0452438	1
Gain69	0.0154085	0.0642298	1
Loss70	0	-0.0014815	1
Loss71	-0.0280336	-0.0604221	1
Loss72	-0.0260022	-0.0518172	1
Loss73	0	0.0234354	1
Loss74	0	-0.0155678	1
Loss75	-0.0434845	-0.0605689	1
Loss76	-0.0663047	-0.0669116	1
Loss77	-0.0841182	-0.0859137	1
Loss78	-0.0836798	-0.0800405	1
Loss79	-0.147893	-0.15902	0.0175378
Loss80	-0.14218	-0.135771	0.00192046
Loss81	-0.153851	-0.148486	0.00436933
Loss82	-0.109207	-0.118565	0.47251
Loss83	-0.0522286	-0.0802572	1
Loss84	-0.104135	-0.113336	0.521274
Loss85	0	0.0213485	1
Loss86	-0.125411	-0.129627	0.10538
Loss87	-0.128805	-0.111693	0.109439
Loss88	-0.026748	-0.0643531	1
Loss89	-0.117706	-0.145282	0.138603
Loss90	-0.197962	-0.216317	9.49215e-06
Loss91	-0.164631	-0.176038	0.000693062
Loss92	-0.117497	-0.124493	1
Loss93	-0.125153	-0.113795	0.128375
Loss94	-0.0528727	-0.059897	1
Loss95	-0.0578469	-0.0617834	1
Loss96	-0.0893179	-0.0837414	1
Loss97	-0.0628641	-0.0647115	1
Loss98	-0.0710685	-0.0892706	1
Loss99	-0.123495	-0.125139	0.157978
Loss100	-0.0989272	-0.106971	1
Loss101	0.00932366	0.0522649	1
Loss102	0	0.00324479	1
Loss103	0	-0.0307105	1
Loss104	0	-0.0411309	1
Loss105	-0.0384915	-0.079136	1
Loss106	-0.0374914	-0.076471	1
Loss107	-0.0662487	-0.101626	1
Loss108	0.0350909	0.0831907	1
Loss109	-0.199922	-0.31085	0.000197578
Loss110	-0.195409	-0.301933	0.00045803
Loss111	-0.201768	-0.277352	9.14525e-05
Loss112	-0.180865	-0.237157	0.000313415
Loss113	-0.176257	-0.230153	3.04704e-05
Loss114	-0.037273	-0.0750887	1
Loss115	-0.0267021	-0.0556737	1
Loss116	-0.0170733	-0.0520106	1
Loss117	-0.0433339	-0.063532	1
Loss118	-0.0169896	-0.0255879	1
Loss119	-0.0489736	-0.0564336	1
Loss120	-0.0777728	-0.157769	1
Loss121	0	-0.0131499	1
Loss122	-0.0159927	-0.0505528	1
Loss123	0	-0.00173813	1
Loss124	0.0334973	0.0827229	1
Loss125	0	0.0388216	1
Loss126	0.0236108	0.0633395	1
Loss127	0.0201346	0.0630657	1
Loss128	0.00417186	0.0480472	1
Loss129	0	0.0117628	1
Loss130	0	0.0385771	1
Loss131	0.000175759	0.0482564	1
Loss132	0	0.0186967	1
Loss133	0	0.0308276	1
Loss134	0.0264435	0.0704329	1
Loss135	0.0113105	0.0548571	1
Loss136	0	0.0318098	1
Loss137	0	0.0215172	1
Loss138	0	-0.0111205	1
Loss139	0	-0.000945271	1
Loss140	0	0.0131071	1
Loss141	0	-0.0108806	1
Loss142	0	0.0019387	1
Loss143	0	0.0495739	1
Loss144	-0.0527144	-0.0590038	1
Loss145	0.00269658	0.0456509	1
Loss146	0.000454565	0.0439626	1
Loss147	0	-0.0326298	1
Loss148	0	0.0213533	1
Loss149	-0.0224081	-0.0667605	1
Loss150	-0.0418315	-0.0735419	1
Loss151	-0.0538871	-0.0813336	1
Loss152	-0.0370481	-0.0641617	1
Loss153	0.0877985	0.120367	1
Loss154	0.0430705	0.0762643	1
Loss155	0.0760314	0.129733	1
Loss156	0.0627762	0.0895801	1
Loss157	-0.0699572	-0.134958	1
Loss158	-0.0784864	-0.0982679	1
Loss159	-0.094131	-0.119384	1
Loss160	-0.0732657	-0.114721	0.9259
Loss161	-0.0170527	-0.0600799	1
Loss162	-0.0185527	-0.0495197	1
Loss163	-0.0603383	-0.102588	1
Loss164	-0.0699556	-0.156873	1
Loss165	-0.00193557	-0.0152351	1
Loss166	-0.0290426	-0.0437591	1
Loss167	-0.0388004	-0.057304	1
Loss168	-0.0354168	-0.0544281	1
Loss169	-0.0390543	-0.0607688	1
Loss170	0	-0.0377638	1
Loss171	-0.0150041	-0.0621684	1
Loss172	-0.141663	-0.1549	0.000652073
Loss173	-0.137846	-0.15556	0.0183769
Loss174	-0.129151	-0.149233	0.00568673
Loss175	-0.144033	-0.159784	0.0104983
Loss176	-0.112405	-0.124947	0.418687
Loss177	-0.116858	-0.12641	0.0812789
Loss178	-0.0929393	-0.106771	1
Loss179	-0.154806	-0.175661	0.000653212
Loss180	-0.166223	-0.174065	0.00038899
Loss181	-0.141248	-0.150334	0.00632525
Loss182	-0.117405	-0.135856	0.256563
Loss183	-0.0346203	-0.0676633	1
Loss184	0.00259115	0.0182471	1
Loss185	0.0552618	0.0822032	1
Loss186	0.00355775	0.022567	1
Loss187	0	-0.00214682	1
Loss188	0	-0.0306782	1
Loss189	-0.0234106	-0.0534722	1
Loss190	-0.0191024	-0.0439432	1
Loss191	0	0.0333382	1
Loss192	-0.000986607	-0.0474529	1
Loss193	-0.0407373	-0.0725352	1
Loss194	-0.0580479	-0.0920025	1
Loss195	-0.0713307	-0.0883647	1
Loss196	0.084983	0.123496	1
Loss197	0.0391888	0.0699687	1
Loss198	0.0473208	0.0663551	1
Loss199	0.0381806	0.0599381	1
Loss200	-0.0410389	-0.0966042	1
Loss201	-0.0395218	-0.0863421	1
Loss202	-0.0987546	-0.114038	0.321063
Loss203	-0.0815533	-0.097968	1
Loss204	0	-0.028387	1
Loss205	-0.0665967	-0.117329	1
Loss206	-0.0116562	-0.0590995	1
Loss207	0	0.0110725	1
Loss208	-0.0487382	-0.0874641	1
Loss209	0	-0.0544339	1
Loss210	-0.0141157	-0.0217501	1
Loss211	0	-0.0222299	1
Loss212	0	-0.0141623	1

## Sheet: rppa_DNA Replication
Epitope	funcSFA Coefficient	OLS Coefficient	p
14-3-3_beta	0	-0.0290054	1
14-3-3_epsilon	0	-0.00239543	1
14-3-3_zeta	0	0.00780767	1
4E-BP1	0.188239	0.190488	0.0104748
4E-BP1_pS65	0.104066	0.0599945	1
4E-BP1_pT37_T46	-0.0949906	-0.140325	1
4E-BP1_pT70	0.106625	0.0739326	1
53BP1	0.130692	0.164398	0.000688629
A-Raf	-0.0121624	-0.0151639	1
A-Raf_pS299	-0.170358	-0.148375	0.0278787
ACC1	0.0146897	0.0470621	1
ACC_pS79	0	0.0142068	1
ACVRL1	-0.0866375	-0.067097	0.127882
ADAR1	0.237718	0.185698	8.32422e-12
AMPK_alpha	-0.0592089	-0.0586691	1
AMPK_pT172	-0.0607751	-0.072908	1
AR	-0.0887613	-0.0559306	1
ARID1A	0.0767257	0.0756638	1
ASNS	0.347029	0.457521	8.81645e-13
ATM	0.144039	0.234846	0.00166948
Acetyl-a-Tubulin-Lys40	-0.0318145	-0.0664844	1
Akt	0.0347408	0.0681055	1
Akt_pS473	-0.289047	-0.399098	1.00041e-08
Akt_pT308	-0.236296	-0.265702	2.99264e-06
Annexin-1	-0.0862058	-0.12592	1
Annexin_VII	0.0577749	0.0249374	1
B-Raf	0	0.0252224	1
B-Raf_pS445	-0.107278	-0.104413	1
BRD4	0.237604	0.244633	1.70218e-13
Bad_pS112	-0.140534	-0.0789706	0.433857
Bak	0.18522	0.0806853	0.000101396
Bap1-c-4	0.0916036	0.0826536	1
Bax	0	-0.0122773	1
Bcl-2	0	0.0139551	1
Bcl-xL	0	-0.0119345	1
Bcl2A1	0.0544625	0.0344206	1
Beclin	0	0.0240707	1
Bid	0.160783	0.0570213	0.390317
Bim	0.322366	0.27606	4.42214e-12
C-Raf	0.139679	0.0836243	6.2683e-05
C-Raf_pS338	0	-0.0325632	1
CD20	0.0695687	0.0435605	1
CD26	-0.161155	-0.120883	0.00494093
CD31	-0.271355	-0.176689	1.58794e-12
CD49b	0.000524788	0.015551	1
CDK1	0	0.00347109	1
CDK1_pY15	0.0500377	0.06154	1
COG3	0	0.0246451	1
Caspase-3	0.0615646	0.0488705	1
Caspase-7_cleavedD198	0.338394	0.473426	2.33013e-13
Caspase-8	-0.160177	-0.185639	0.624111
Caveolin-1	-0.473066	-0.963501	5.19266e-28
Chk1	0.0744123	0.0585463	1
Chk1_pS296	0.102695	0.0508661	0.278165
Chk1_pS345	0.0412374	0.0403728	1
Chk2	0.147838	0.136837	0.0548735
Chk2_pT68	0.100183	0.0532259	1
Claudin-7	-0.181932	-0.28127	0.00852918
Collagen_VI	-0.208669	-0.225349	5.65126e-06
Cyclin_B1	0.399008	0.5628	1.64622e-20
Cyclin_D1	0.100926	0.0716143	1
Cyclin_E1	0.243496	0.213394	3.39124e-06
Cyclin_E2	0.20553	0.0913066	3.66906e-05
DIRAS3	0	-0.0175892	1
DJ-1	-0.0106022	-0.034397	1
DUSP4	0.0444764	0.070071	1
Dvl3	0.148724	0.0972295	0.0183205
E-Cadherin	-0.162439	-0.261528	0.0147802
EGFR	0.0231831	0.0398762	1
EGFR_pY1068	-0.0562254	-0.0918191	1
EGFR_pY1173	0.03535	0.0201815	1
EPPK1	-0.00332546	-0.0146478	1
ER-alpha	0	-0.0206317	1
ER-alpha_pS118	-0.00293704	-0.0267807	1
ERCC1	-0.103095	-0.107054	1
ERCC5	0.0146652	0.0314136	1
ERK2	0.140403	0.156542	0.00442165
ETS-1	0.0904031	0.0451951	1
FASN	-0.0700057	-0.105311	1
FOXO3a	0	-0.0167137	1
FOXO3a_pS318_S321	-0.0841869	-0.0553217	0.372648
Fibronectin	0.185381	0.269937	0.00257063
FoxM1	0.333167	0.286519	5.33107e-13
G6PD	0.0812728	0.135927	1
GAB2	0.0317885	0.0677297	1
GAPDH	0.153599	0.292895	0.26432
GATA3	0.15879	0.103888	0.00163375
GSK3-alpha-beta	0.0623367	0.0499475	1
GSK3-alpha-beta_pS21_S9	-0.111965	-0.136623	1
GSK3_pS9	-0.0995326	-0.144538	1
HER2	-0.0331577	-0.0422999	1
HER2_pY1248	-0.122158	-0.121547	1
HER3	-0.165064	-0.14143	0.279493
HER3_pY1289	0	0.0104543	1
HSP70	0	0.013805	1
Heregulin	-0.000663514	-0.032701	1
IGF1R_pY1135_Y1136	0	-0.027458	1
IGFBP2	-0.194056	-0.45808	0.000647548
INPP4B	0.0615175	0.100193	1
IRF-1	0.165663	0.107433	2.13462e-05
IRS1	0.0836771	0.051631	1
JAB1	-0.0473775	-0.051753	1
JNK2	-0.00268701	-0.01298	1
JNK_pT183_pY185	-0.15166	-0.0863039	0.000413781
Jak2	0.104939	0.0881633	0.00345341
Ku80	0.0761796	0.102069	0.238642
LKB1	0.0900806	0.0501137	1
Lck	0.0980173	0.0929305	1
MAPK_pT202_Y204	-0.351578	-0.399832	4.20121e-14
MEK1	-0.0178988	-0.0293953	1
MEK1_pS217_S221	-0.229462	-0.153764	2.14602e-09
MIG-6	0.12104	0.0832672	0.171326
MSH2	0.260474	0.241936	7.0594e-13
MSH6	0.35692	0.379531	1.03493e-23
MYH11	-0.407001	-1.09296	1.53909e-17
Mre11	0.0279412	0.0257381	1
Myosin-IIa_pS1943	0	0.0239523	1
N-Cadherin	0.0519503	0.045378	1
N-Ras	0.0494733	0.0177172	1
NDRG1_pT346	-0.228995	-0.519757	7.665e-05
NF-kB-p65_pS536	0.0493647	0.0948398	1
NF2	0	0.00599308	1
Notch1	0.0871495	0.0461787	1
P-Cadherin	0.0801527	0.0679323	1
PAI-1	0.163916	0.325353	0.0131362
PARP_cleaved	-0.19948	-0.34277	0.00788045
PCNA	0.220134	0.133051	7.74345e-05
PDCD4	-0.249699	-0.303067	1.79014e-05
PDK1	-0.0657175	-0.059395	0.0189119
PDK1_pS241	-0.0616402	-0.0404567	1
PEA15	0.0338338	0.0374223	1
PEA15_pS116	0	-0.00310223	1
PI3K-p110-alpha	0	0.0121748	1
PI3K-p85	0	0.0197081	1
PKC-alpha	-0.0342641	-0.0341052	1
PKC-alpha_pS657	-0.0571276	-0.0551083	1
PKC-delta_pS664	-0.0317241	-0.0159445	1
PKC-pan_BetaII_pS660	-0.125253	-0.139178	0.0678552
PR	-0.0238605	-0.0236589	1
PRAS40_pT246	-0.207579	-0.10831	9.77625e-06
PRDX1	0.020031	0.0281476	1
PREX1	0.114469	0.0722473	0.681876
PTEN	-0.0720916	-0.0667113	1
Paxillin	-0.0846015	-0.10443	1
RBM15	0.127785	0.153009	0.00605359
Rab11	-0.133197	-0.0885145	0.0007121
Rab25	-0.169517	-0.165786	0.00886394
Rad50	0.121003	0.0826352	0.00139822
Rad51	0.093716	0.0695538	1
Raptor	0.145471	0.124381	0.00110179
Rb	-0.0616835	-0.0709662	1
Rb_pS807_S811	0	0.0104115	1
Rictor	-0.154651	-0.222812	0.215199
Rictor_pT1135	-0.103029	-0.0719569	0.030151
S6	0.0702287	0.085579	1
S6_pS235_S236	-0.254815	-0.331782	3.37481e-06
S6_pS240_S244	-0.22994	-0.355274	0.00024069
SCD	0	-0.0135432	1
SETD2	-0.079577	-0.121411	1
SF2	0.0454769	0.0295518	1
SHP-2_pY542	-0.306254	-0.230482	4.08319e-11
STAT3_pY705	-0.332348	-0.242041	1.74311e-11
STAT5-alpha	0.123802	0.205736	0.000274
Shc_pY317	-0.0797665	-0.0554317	1
Smac	-0.0983281	-0.112174	1
Smad1	0.0761763	0.0399142	1
Smad3	0.0947	0.0353877	1
Smad4	0	-0.020744	1
Snail	-0.196284	-0.320242	0.0109685
Src	0	-0.0183937	1
Src_pY416	-0.202951	-0.231872	0.00108197
Src_pY527	-0.267252	-0.328917	2.32506e-07
Stathmin	0.148282	0.082304	0.0003251
Syk	0.0997133	0.132788	1
TAZ	0.0225136	0.014708	1
TFRC	0.256711	0.462662	2.55486e-06
TIGAR	0.0474223	0.0421992	1
TSC1	0.034724	0.0690516	1
TTF1	-0.419721	-1.07087	2.50194e-21
Transglutaminase	-0.233047	-0.228765	4.9317e-05
Tuberin	0.0401218	0.0734909	1
Tuberin_pT1462	-0.210505	-0.126719	0.000529247
VEGFR2	0	0.00491312	1
XBP1	0.0939601	0.0768522	1
XRCC1	0.122729	0.0659186	0.760348
YAP	-0.0938353	-0.0910012	0.827449
YAP_pS127	-0.322027	-0.34366	7.30652e-11
YB-1	0.100294	0.126732	1
YB-1_pS102	-0.172023	-0.12478	0.000176558
beta-Catenin	-0.107874	-0.161479	0.163716
c-Abl	0.0406012	0.0279559	1
c-Jun_pS73	-0.195033	-0.112708	0.000561209
c-Kit	-0.230456	-0.338697	1.51778e-05
c-Met	-0.22907	-0.34187	0.000243313
c-Met_pY1235	0.161221	0.0565519	8.56324e-05
c-Myc	0.0680133	0.0608173	1
cIAP	0.115581	0.0651625	0.0673711
eEF2	0.162336	0.122395	0.000148978
eEF2K	0	0.0227797	1
eIF4E	-0.0341868	-0.0426574	1
eIF4G	0.118135	0.225058	0.00463588
mTOR	-0.0134501	-0.00955849	1
mTOR_pS2448	-0.332346	-0.185179	4.06954e-13
p16_INK4a	0	-0.0118198	1
p21	0.0534299	0.065353	1
p27	0	-0.0131284	1
p27_pT157	0.0113417	0.0233679	1
p27_pT198	0.208945	0.109989	8.68145e-08
p38_MAPK	-0.0268204	-0.0358698	1
p38_pT180_Y182	-0.279768	-0.325126	4.38476e-09
p53	0.145418	0.159022	0.949719
p62-LCK-ligand	0.0383558	0.0937131	1
p70S6K	0.158177	0.136125	0.000190255
p70S6K_pT389	-0.0464737	-0.0381002	1
p90RSK	-0.148379	-0.105279	0.0720905
p90RSK_pT359_S363	-0.114984	-0.0690064	1

## Sheet: rnaseq_DNA Replication
Gene	funcSFA Coefficient	OLS Coefficient	p
ENSG00000011347.8	-0.0253908	-0.0514933	1
ENSG00000161798.6	-0.373933	-0.273049	1.51287e-24
ENSG00000115525.15	-0.493955	-0.314523	0
ENSG00000137491.13	-0.119023	-0.13007	1.20659e-19
ENSG00000133657.13	0.0567566	0.0752373	0.0477468
ENSG00000221867.7	0.110932	0.0839387	1
ENSG00000156298.11	-0.0445632	-0.136159	2.44856e-10
ENSG00000114948.11	0.0456364	0.0690718	0.018189
ENSG00000099204.17	-0.0728151	-0.128856	0.000176038
ENSG00000148175.11	-0.19715	-0.164097	1.01855e-10
ENSG00000157514.15	-0.288356	-0.211126	5.01593e-16
ENSG00000177697.16	-0.301146	-0.190302	1.45512e-21
ENSG00000140443.12	0	-0.0325534	1
ENSG00000118816.8	-0.0957135	-0.085595	0.000266002
ENSG00000138119.15	-0.156716	-0.139448	4.14263e-07
ENSG00000215021.7	0.0337066	0.0471095	0.610599
ENSG00000196743.7	0	-0.0132539	1
ENSG00000166741.6	-0.188092	-0.167274	1.80167e-09
ENSG00000067057.15	0.0365507	0.112991	0.0034348
ENSG00000158467.15	-0.548972	-0.414761	0
ENSG00000023909.8	0	0.0538565	1
ENSG00000122862.4	0	-0.0376548	1
ENSG00000141526.13	0	0.0100665	1
ENSG00000120875.7	-0.0160526	-0.00778429	1
ENSG00000110880.9	0	0.0496068	0.830631
ENSG00000104408.8	0	-0.0312662	1
ENSG00000007038.9	0	0.0134488	1
ENSG00000085662.12	0.0904765	0.127125	3.48094e-06
ENSG00000143387.11	0.0318948	0.113798	6.34934e-09
ENSG00000111275.11	-0.323908	-0.219244	1.26125e-19
ENSG00000167900.10	0.185317	0.195388	1.05604e-18
ENSG00000044115.19	-0.246707	-0.166967	1.98902e-20
ENSG00000211965.3	0	-0.0338509	1
ENSG00000145741.14	-0.0013332	-0.0480092	0.447933
ENSG00000078369.16	0	-0.0237091	1
ENSG00000060656.18	-0.258313	-0.168737	2.8692e-11
ENSG00000049540.15	-0.433396	-0.365468	0
ENSG00000114374.11	0.0453016	0.052211	1
ENSG00000039560.12	-0.089049	-0.121396	0.00164214
ENSG00000138448.10	0	-0.0395163	1
ENSG00000135624.14	0.0880821	0.0968491	2.58063e-17
ENSG00000101335.8	-0.0111126	-0.0242213	1
ENSG00000163898.8	-0.343794	-0.22239	3.26932e-23
ENSG00000058063.14	0	0.034792	1
ENSG00000049323.14	0	-0.0134254	1
ENSG00000158769.16	0	-0.0457483	1
ENSG00000156471.11	0.00321491	0.0364958	1
ENSG00000101311.14	0	-0.0110435	1
ENSG00000065833.8	0.0469748	0.0719219	0.00138693
ENSG00000100994.10	-0.0930065	-0.0775242	1
ENSG00000232629.7	-0.252001	-0.181786	2.01724e-16
ENSG00000013364.17	-0.37177	-0.254721	2.24208e-43
ENSG00000125844.14	-0.183811	-0.15236	2.20754e-09
ENSG00000164626.8	-0.402071	-0.244122	0
ENSG00000143384.11	-0.0990686	-0.0730703	0.225144
ENSG00000242574.7	-0.129556	-0.109216	2.70856e-23
ENSG00000179593.14	-0.525109	-0.381344	0
ENSG00000114638.6	0	0.0130709	1
ENSG00000141736.12	-0.235576	-0.183072	1.01459e-10
ENSG00000146731.9	0.0560503	0.102872	6.42691e-05
ENSG00000157613.9	-0.394427	-0.279621	5.14408e-26
ENSG00000165140.8	-0.389801	-0.267924	4.11842e-42
ENSG00000103888.14	-0.0133924	-0.0857529	0.266313
ENSG00000127324.7	-0.382909	-0.305841	8.73904e-29
ENSG00000084733.9	0	0.0536171	0.0714101
ENSG00000149573.7	-0.309122	-0.267129	3.12689e-28
ENSG00000225548.4	0.175879	0.0908854	2.28739e-07
ENSG00000176014.11	0.0136682	0.093237	1.6467e-05
ENSG00000206073.9	0.0198196	0.0451799	1
ENSG00000147381.10	0.17719	0.141462	5.948e-06
ENSG00000174231.15	-0.0286503	-0.0915278	0.000136341
ENSG00000148773.11	0.278227	0.228903	1.74478e-20
ENSG00000115306.14	-0.148155	-0.160339	2.32167e-09
ENSG00000182871.13	-0.0236876	-0.0250191	1
ENSG00000150687.10	-0.00391805	-0.0150385	1
ENSG00000067560.9	-0.173563	-0.102578	6.99192e-14
ENSG00000101160.12	-0.136094	-0.09629	8.26052e-06
ENSG00000177469.12	-0.0175376	-0.0662601	1
ENSG00000085552.15	0.0319737	0.0758718	0.698185
ENSG00000211637.2	0	-0.0171205	1
ENSG00000170476.14	0	-0.0145874	1
ENSG00000112245.8	-0.146013	-0.133524	8.58974e-06
ENSG00000163872.14	0.087197	0.0894927	8.66098e-09
ENSG00000140575.11	-0.154734	-0.145021	1.58096e-12
ENSG00000140264.18	-0.013768	-0.0404521	1
ENSG00000211955.2	0	-0.0011621	1
ENSG00000105426.13	0	-0.0287206	1
ENSG00000165152.7	0	-0.000903862	1
ENSG00000180818.4	0.0822892	0.0696473	1
ENSG00000129654.7	-0.332762	-0.23022	8.94972e-17
ENSG00000165280.14	0	0.0135602	1
ENSG00000241755.1	0	-0.0324758	1
ENSG00000103460.15	-0.325865	-0.263911	4.08752e-35
ENSG00000067048.15	0.0847815	0.0882272	1
ENSG00000233864.6	0.0560663	0.0557603	1
ENSG00000136518.15	0.163091	0.119847	1.5615e-17
ENSG00000176945.15	-0.146902	-0.16023	1.82514e-06
ENSG00000152234.14	0	-0.0447488	1
ENSG00000104783.10	-0.0528441	-0.0376883	1
ENSG00000105707.12	-0.408104	-0.345559	1.4013e-45
ENSG00000072041.15	0.135387	0.0751839	0.00400137
ENSG00000163739.4	0	-0.0999646	0.0351949
ENSG00000140564.9	-0.0990116	-0.113769	0.098016
ENSG00000143850.11	-0.159658	-0.0913924	0.0226008
ENSG00000170348.7	-0.0658689	-0.0829387	0.00131041
ENSG00000234741.6	0	-0.00435442	1
ENSG00000100201.17	-0.0570114	-0.095598	0.00309824
ENSG00000060982.13	-0.101655	-0.126525	0.00462349
ENSG00000176788.8	0	-0.016343	1
ENSG00000131781.11	-0.49703	-0.319334	0
ENSG00000142676.11	-0.0809303	-0.0792086	0.00637542
ENSG00000149257.12	0	0.00696584	1
ENSG00000025708.11	0	0.0412004	1
ENSG00000019169.10	-0.229405	-0.22035	1.31132e-21
ENSG00000130208.8	-0.086422	-0.0947203	0.00658846
ENSG00000251381.5	0	-0.00235463	1
ENSG00000112936.17	-0.604722	-0.588643	0
ENSG00000124225.14	-0.0371258	-0.0420385	1
ENSG00000104687.11	0	-0.0236125	1
ENSG00000111371.14	0.118189	0.105103	0.0348998
ENSG00000108551.4	-0.23753	-0.183427	3.92586e-11
ENSG00000170315.12	-0.0804532	-0.0686789	1
ENSG00000114416.16	0.0794373	0.093704	3.08007e-08
ENSG00000140937.12	-0.0592927	-0.0901109	0.000188421
ENSG00000204469.11	0	-0.00037495	1
ENSG00000131002.10	0.0574985	0.0637866	1
ENSG00000163466.14	0	-0.00692071	1
ENSG00000115091.10	0	0.0417996	1
ENSG00000091129.18	0.0451657	0.0659373	1
ENSG00000125148.6	0.0795256	0.160924	2.27792e-06
ENSG00000137076.17	-0.0563413	-0.0700088	0.114772
ENSG00000114346.12	0.22659	0.144828	9.40899e-15
ENSG00000106483.10	-0.00556599	-0.035592	1
ENSG00000168528.10	-0.119924	-0.13589	4.21681e-06
ENSG00000135069.12	0.19945	0.153008	2.70336e-11
ENSG00000265933.4	0.161666	0.0868073	1.45947e-05
ENSG00000203747.8	0	0.0295549	1
ENSG00000069275.12	0	0.0106073	1
ENSG00000007062.10	-0.106329	-0.099873	0.195733
ENSG00000100304.12	0	0.00593647	1
ENSG00000168615.10	-0.0873571	-0.126835	0.00191926
ENSG00000128595.15	0	0.0575493	1
ENSG00000144824.18	0	0.0326683	1
ENSG00000125835.16	0.179741	0.160141	2.84676e-24
ENSG00000115484.13	0.100273	0.0899134	1.33514e-10
ENSG00000111206.11	0.334152	0.247279	6.80232e-34
ENSG00000166165.11	-0.126199	-0.174496	1.06321e-05
ENSG00000182175.12	0	-0.0635617	1
ENSG00000248527.1	0	0.048684	1
ENSG00000160789.18	-0.0238308	-0.0498328	1
ENSG00000142102.14	-0.0583835	-0.0410349	1
ENSG00000110651.10	-0.227446	-0.219812	3.19999e-30
ENSG00000119335.15	0.0566809	0.0961908	3.34269e-08
ENSG00000277443.1	0.0418631	0.0917342	0.001342
ENSG00000103485.16	-0.00914362	0.000842269	1
ENSG00000251562.6	-0.114801	-0.130623	0.0802036
ENSG00000128016.5	-0.247211	-0.231272	9.03215e-14
ENSG00000131668.12	0.0843738	0.0750183	1
ENSG00000130255.11	0	0.037746	1
ENSG00000187193.8	0.0316234	0.09231	0.00567943
ENSG00000172809.11	0	0.0729633	0.000512765
ENSG00000019549.7	0.0634465	0.0650478	0.0001261
ENSG00000092820.16	-0.224543	-0.176703	8.89831e-12
ENSG00000018236.13	0	-0.0947461	0.081798
ENSG00000108654.10	0	-0.0508305	1
ENSG00000158195.9	0	-0.0745459	0.00913232
ENSG00000136689.17	0	-0.0256924	1
ENSG00000124766.5	-0.0235259	-0.0731424	1
ENSG00000087128.8	0	-0.00978413	1
ENSG00000052344.14	-0.30633	-0.24448	3.82657e-22
ENSG00000014216.14	-0.0815212	-0.0987333	6.61605e-07
ENSG00000250722.4	-0.30132	-0.310282	3.87708e-26
ENSG00000149591.15	-0.0481701	-0.0737684	0.398127
ENSG00000135862.5	0	0.00975903	1
ENSG00000213853.8	-0.296794	-0.272037	2.88734e-23
ENSG00000176619.9	0.161573	0.134152	5.67886e-15
ENSG00000162909.16	-0.286246	-0.216584	1.05284e-23
ENSG00000134184.11	0	-0.0142304	1
ENSG00000160710.14	0	0.0221299	1
ENSG00000113739.9	0.209254	0.14528	2.13467e-11
ENSG00000164032.10	0.161708	0.149374	4.87197e-18
ENSG00000088325.14	0.382009	0.305251	2.35418e-43
ENSG00000099725.13	0.0606466	0.0592291	1
ENSG00000108582.10	-0.0496327	-0.0542121	1
ENSG00000105281.11	0	0.038704	1
ENSG00000275410.3	-0.528518	-0.358847	0
ENSG00000114554.10	0	0.019849	1
ENSG00000155066.14	-0.100053	-0.117467	0.0232852
ENSG00000106546.11	-0.161322	-0.155438	2.76386e-07
ENSG00000163331.9	0.00783454	0.0159141	1
ENSG00000176597.10	0.0956945	0.091464	0.000540177
ENSG00000136153.18	-0.412611	-0.269869	1.51581e-32
ENSG00000104140.6	0	0.0416426	1
ENSG00000149418.9	0	-0.0291357	1
ENSG00000177565.14	0	0.0400181	1
ENSG00000229807.8	-0.104728	-0.10543	0.649109
ENSG00000075275.15	-0.205053	-0.239971	2.10355e-27
ENSG00000136830.10	-0.17855	-0.160334	5.68384e-12
ENSG00000188910.7	0	0.0508347	1
ENSG00000111907.19	0	0.012598	1
ENSG00000157404.14	-0.260015	-0.240719	3.45658e-17
ENSG00000197565.14	0	-0.0171347	1
ENSG00000047936.9	-0.721999	-0.677024	0
ENSG00000125398.5	0	0.0110883	1
ENSG00000072210.17	-0.173645	-0.20336	9.162e-18
ENSG00000139289.12	0	-0.0219401	1
ENSG00000196262.12	0	0.078349	0.00145278
ENSG00000092199.16	0	0.0493264	0.000320728
ENSG00000166147.12	0	0.00857792	1
ENSG00000150991.13	0	0.00214783	1
ENSG00000111341.8	-0.327827	-0.287884	4.03464e-30
ENSG00000136002.15	0.0275229	0.0753684	0.261776
ENSG00000090104.10	0	0.0121676	1
ENSG00000163032.10	0.00747096	0.0269311	1
ENSG00000165168.7	-0.0190504	-0.0660524	0.00457316
ENSG00000104904.11	0	-0.0296032	1
ENSG00000133477.15	0.111438	0.103835	0.0198058
ENSG00000211941.3	0	-0.00108732	1
ENSG00000140105.16	0	0.074999	1
ENSG00000163468.13	0.0227117	0.106921	9.3281e-11
ENSG00000213639.8	0	-0.0236295	1
ENSG00000105976.13	-0.0997772	-0.139694	0.147348
ENSG00000146555.17	0	-0.0670285	1
ENSG00000006747.13	-0.178416	-0.162181	1.63071e-07
ENSG00000072110.12	0	0.082751	0.00199844
ENSG00000143878.9	-0.248217	-0.188783	9.22659e-09
ENSG00000166670.8	0	-0.0624882	1
ENSG00000079308.15	-0.412251	-0.32774	0
ENSG00000058262.8	0	-0.0442566	1
ENSG00000162244.9	-0.0648847	-0.0528535	1
ENSG00000228253.1	0	0.0510881	1
ENSG00000067167.6	-0.293691	-0.226407	7.406e-26
ENSG00000163453.10	-0.0193538	-0.0597298	1
ENSG00000211956.2	0	-0.0411321	1
ENSG00000066405.11	-0.577	-0.441168	0
ENSG00000064042.16	-0.405028	-0.300652	1.04981e-39
ENSG00000065361.13	-0.312548	-0.255378	1.57859e-27
ENSG00000275395.3	-0.335183	-0.258741	1.50553e-18
ENSG00000182481.7	0.285917	0.224323	6.71972e-33
ENSG00000159335.14	0.0764245	0.0916516	0.0170416
ENSG00000140526.15	-0.166028	-0.160153	2.05419e-08
ENSG00000204257.13	-0.298408	-0.199889	0
ENSG00000134419.14	0	-0.0324814	1
ENSG00000085063.13	-0.244035	-0.223594	1.24819e-20
ENSG00000029153.13	0.080501	0.12951	2.8892e-08
ENSG00000075426.10	-0.0403244	-0.0755783	0.175694
ENSG00000006118.13	0.0808705	0.11153	4.5716e-05
ENSG00000168453.13	0	0.0236531	1
ENSG00000010292.11	0.182605	0.144133	3.45093e-16
ENSG00000163975.10	0.142579	0.190918	4.7442e-15
ENSG00000143870.11	0	-0.0165467	1
ENSG00000205336.10	0	-0.0457788	1
ENSG00000131981.14	-0.191704	-0.163968	1.73458e-12
ENSG00000129116.16	0	0.0156355	1
ENSG00000237541.3	-0.0656279	-0.0912029	1
ENSG00000157601.12	0	0.0188986	1
ENSG00000186468.11	-0.0293992	-0.0620565	0.158512
ENSG00000086598.9	0	-0.0302921	1
ENSG00000132746.13	0	0.0516262	1
ENSG00000167244.16	0	0.0881447	1
ENSG00000280411.1	0	0.00861176	1
ENSG00000118898.14	-0.166357	-0.173422	6.47666e-10
ENSG00000110799.12	-0.292061	-0.277781	1.57923e-28
ENSG00000170027.6	0.00518588	0.0722907	0.00224162
ENSG00000100644.15	0	0.0106789	1
ENSG00000211950.2	0	0.0302794	1
ENSG00000029993.13	-0.00772017	-0.0463683	1
ENSG00000198242.12	0	-0.00489715	1
ENSG00000168394.10	0.0578242	0.157992	5.48015e-11
ENSG00000105974.10	-0.127112	-0.173248	9.75129e-08
ENSG00000211962.2	0	-0.0133306	1
ENSG00000168003.15	0.0440423	0.101268	2.50641e-06
ENSG00000141367.10	-0.0741003	-0.0596337	1
ENSG00000131771.12	-0.558019	-0.461633	0
ENSG00000167183.2	-0.49571	-0.330417	0
ENSG00000090530.8	-0.171483	-0.240985	7.04697e-16
ENSG00000166508.16	0.215668	0.182831	1.4385e-23
ENSG00000130513.6	-0.339644	-0.245445	5.12506e-17
ENSG00000173376.12	-0.664685	-0.546863	0
ENSG00000221983.6	0	0.0358232	1
ENSG00000177575.11	-0.0281047	-0.0838427	0.00529713
ENSG00000143321.17	0.0326526	0.118214	5.07256e-08
ENSG00000143365.15	-0.467222	-0.333708	0
ENSG00000146166.15	-0.033404	-0.0614156	1
ENSG00000104738.15	0.235466	0.18527	1.46896e-20
ENSG00000152583.11	-0.191101	-0.235106	1.00412e-19
ENSG00000130726.10	0.0505078	0.0715184	0.0911906
ENSG00000107796.11	-0.0641723	-0.0805469	0.0358798
ENSG00000211669.2	0	-0.00337974	1
ENSG00000110958.14	0.00903596	0.069325	0.000123763
ENSG00000169604.18	0	-0.039641	1
ENSG00000138271.5	0	0.0645983	1
ENSG00000171560.13	-0.315572	-0.32804	4.68422e-29
ENSG00000091136.12	0	0.0259404	1
ENSG00000188906.12	-0.704645	-0.585785	0
ENSG00000135486.16	0	0.0120806	1
ENSG00000143126.7	0	-0.0180671	1
ENSG00000166923.9	0.0867586	0.154579	9.16174e-10
ENSG00000133048.11	-0.212787	-0.260841	1.79995e-12
ENSG00000197102.9	0	-0.0233046	1
ENSG00000179178.9	-0.548023	-0.398873	0
ENSG00000137642.11	-0.0569211	-0.154955	4.9225e-05
ENSG00000135919.11	0	0.0345011	1
ENSG00000121579.11	0.00520496	0.0491407	1
ENSG00000186529.13	0.103321	0.102619	2.76742e-08
ENSG00000135318.10	-0.0965575	-0.0810702	0.395491
ENSG00000124664.9	-0.36836	-0.262116	0
ENSG00000075785.11	0	0.0393682	1
ENSG00000159403.14	-0.00690971	-0.0607338	1
ENSG00000143761.12	-0.0806419	-0.0463925	1
ENSG00000173821.18	-0.0349757	-0.0142538	1
ENSG00000009307.14	-0.0473209	-0.0843925	0.0107481
ENSG00000185215.7	0	0.0995776	0.505482
ENSG00000143061.16	0	-0.0816874	0.0452572
ENSG00000125285.5	0	-0.0168183	1
ENSG00000132386.9	0	-0.0456404	1
ENSG00000152952.10	0.108863	0.122811	0.00411855
ENSG00000173467.7	-0.677726	-0.58049	0
ENSG00000135052.15	-0.0642599	-0.0445153	1
ENSG00000114251.12	0	-0.0084966	1
ENSG00000171658.7	0.0994253	0.0846176	8.44923e-09
ENSG00000160862.11	-0.310953	-0.236913	2.84327e-12
ENSG00000003436.13	-0.408069	-0.340224	8.46499e-29
ENSG00000066468.19	-0.094237	-0.179145	4.2251e-14
ENSG00000121039.8	-0.0784226	-0.127584	0.0136283
ENSG00000163131.9	-0.185234	-0.143084	1.33736e-14
ENSG00000211947.2	0	-0.000936066	1
ENSG00000168036.15	-0.164218	-0.150381	3.16736e-10
ENSG00000113657.11	-0.0500091	-0.104919	0.139533
ENSG00000165119.17	0	0.00337296	1
ENSG00000142871.14	-0.0872542	-0.0774702	0.631023
ENSG00000130707.16	-0.181948	-0.176945	2.42988e-06
ENSG00000112972.13	0.028824	0.0430641	1
ENSG00000164687.9	0	-0.00156215	1
ENSG00000134107.4	-0.181097	-0.164535	3.25462e-09
ENSG00000197930.11	0	0.0327171	1
ENSG00000137745.10	0	-0.0537864	1
ENSG00000074416.12	-0.514377	-0.37658	0
ENSG00000109861.14	0	0.00172421	1
ENSG00000003989.15	-0.163583	-0.18122	7.98344e-07
ENSG00000139318.7	-0.307813	-0.235379	1.25361e-17
ENSG00000091986.14	0	-0.0557905	1
ENSG00000268104.2	-0.456754	-0.398995	6.57181e-41
ENSG00000270550.1	0	-0.0190161	1
ENSG00000144810.14	-0.197266	-0.185764	4.99361e-20
ENSG00000129451.10	0	-0.0443004	1
ENSG00000155660.9	-0.0218682	-0.0535065	1
ENSG00000132002.6	0	0.0579292	1
ENSG00000102287.15	0	-0.021111	1
ENSG00000175061.16	0	-0.0658408	0.989551
ENSG00000196562.13	0.0286692	0.0840523	0.116771
ENSG00000102007.9	0	0.0343718	1
ENSG00000136167.12	0	-0.0512968	1
ENSG00000182379.9	0.111354	0.0833763	0.00341844
ENSG00000108518.7	0	0.033578	1
ENSG00000090776.5	0	-0.00117612	1
ENSG00000109472.12	-0.046028	-0.0912908	1
ENSG00000116016.12	-0.394221	-0.316032	5.58098e-31
ENSG00000170017.11	-0.24788	-0.261774	1.13757e-13
ENSG00000163902.10	0	0.0062544	1
ENSG00000171867.15	0	-0.000441236	1
ENSG00000188229.5	0	0.0423829	1
ENSG00000260314.2	-0.197645	-0.206375	3.63216e-26
ENSG00000185650.9	-0.227357	-0.215818	1.46334e-16
ENSG00000117525.12	-0.252578	-0.265515	7.23832e-16
ENSG00000211648.2	0	-0.0299032	1
ENSG00000125740.12	-0.222858	-0.253565	9.54105e-13
ENSG00000101444.11	0.0879763	0.0828715	1.94792e-05
ENSG00000177156.9	0	0.00258013	1
ENSG00000244437.1	0	0.00597576	1
ENSG00000082641.14	0	0.00316402	1
ENSG00000116044.14	0	-0.0627583	0.440458
ENSG00000169474.4	0	-0.0138423	1
ENSG00000130294.13	0.179794	0.180768	1.40943e-08
ENSG00000211673.2	0	0.0111653	1
ENSG00000164308.15	0	0.00163109	1
ENSG00000196531.9	0	0.0126307	1
ENSG00000162366.6	-0.333276	-0.298633	2.61139e-27
ENSG00000164171.9	-0.0325498	-0.0827733	1
ENSG00000110092.3	-0.121565	-0.124337	1
ENSG00000166535.18	0.0228014	0.0315879	1
ENSG00000167757.12	-0.116043	-0.185533	2.70713e-07
ENSG00000118680.11	0	-0.0166863	1
ENSG00000211934.3	0	-0.0354207	1
ENSG00000161011.18	0	-0.0183716	1
ENSG00000160180.15	-0.323541	-0.29841	8.94126e-20
ENSG00000162551.12	-0.570064	-0.512667	0
ENSG00000163682.14	-0.0373381	-0.0552706	1
ENSG00000164120.12	-0.548521	-0.432655	0
ENSG00000102265.10	-0.121112	-0.110657	0.0183298
ENSG00000105357.14	-0.105579	-0.135402	0.00546358
ENSG00000104368.16	-0.0823697	-0.118574	0.275555
ENSG00000100985.7	0.0567882	0.129067	0.00315417
ENSG00000198561.11	-0.0495663	-0.0897523	0.0049256
ENSG00000119681.10	-0.194851	-0.191717	1.35545e-18
ENSG00000122566.19	0.00236272	0.0669703	0.0480257
ENSG00000189280.3	0	0.0267617	1
ENSG00000132475.7	0	0.00801542	1
ENSG00000163430.8	0	0.0428536	1
ENSG00000030582.15	-0.0988172	-0.103646	0.000598819
ENSG00000118523.5	0	-0.00819262	1
ENSG00000135404.10	-0.272544	-0.208424	1.05583e-26
ENSG00000105223.17	-0.110981	-0.165918	1.47931e-05
ENSG00000171858.16	0	0.048437	1
ENSG00000167165.17	0.010704	0.0255094	1
ENSG00000139926.14	0.0147416	0.056789	0.0301709
ENSG00000108352.10	0	0.0481777	1
ENSG00000140519.11	0.0576713	0.0735097	0.0804477
ENSG00000172270.17	0	-0.0489711	1
ENSG00000115677.15	-0.113363	-0.123842	5.56973e-07
ENSG00000160255.15	-0.10607	-0.0872493	6.76278e-05
ENSG00000163565.17	0	0.0145022	1
ENSG00000070526.13	-0.447035	-0.374794	1.5731e-41
ENSG00000196576.13	-0.223596	-0.215733	7.01916e-17
ENSG00000174748.17	-0.0725797	-0.0945067	1.07261e-07
ENSG00000133063.14	-0.148886	-0.188703	6.41797e-10
ENSG00000138449.9	-0.310564	-0.298905	4.24827e-24
ENSG00000089009.14	0	0.00144199	1
ENSG00000137673.7	-0.185883	-0.223777	5.58627e-10
ENSG00000132341.10	0.120668	0.126994	2.52673e-20
ENSG00000198911.10	0	-0.077854	0.0182976
ENSG00000169100.11	0	-0.0372836	1
ENSG00000184012.10	-0.610589	-0.535652	0
ENSG00000156482.9	0	-0.00152359	1
ENSG00000105640.11	0	0.0468556	1
ENSG00000134308.12	0.0514728	0.0718889	0.00642146
ENSG00000115221.9	-0.436319	-0.417533	8.59837e-42
ENSG00000257017.7	-0.633927	-0.613143	0
ENSG00000117632.19	0.266972	0.238895	4.82391e-21
ENSG00000069011.14	0.0140519	0.0777316	1
ENSG00000159228.11	-0.0389987	-0.108522	0.21545
ENSG00000136997.13	0.0174367	0.0480421	1
ENSG00000112715.19	-0.0698901	-0.0914416	1
ENSG00000150093.17	0	-0.0048248	1
ENSG00000116260.15	-0.324902	-0.268815	1.10928e-25
ENSG00000212907.2	0	0.0353903	1
ENSG00000163207.6	-0.0495008	-0.100136	0.00281019
ENSG00000211445.10	-0.295253	-0.211161	6.34623e-13
ENSG00000092841.17	-0.00935957	-0.0259977	1
ENSG00000145425.8	-0.00745752	-0.0549563	1
ENSG00000174437.15	0	-0.0230213	1
ENSG00000170889.12	-0.0781691	-0.094974	1.97859e-06
ENSG00000211943.2	0	-0.0295619	1
ENSG00000089597.15	0	0.00453711	1
ENSG00000070731.8	0	-0.0212175	1
ENSG00000064655.17	0	0.0201121	1
ENSG00000035862.11	0	0.0298653	1
ENSG00000134247.9	0	0.00596112	1
ENSG00000107159.11	0	-0.0321849	1
ENSG00000083857.12	0	-0.0727703	1
ENSG00000177600.7	-0.0175403	-0.0300183	1
ENSG00000197756.8	-0.00652543	-0.0375318	1
ENSG00000174469.16	0.0767037	0.0840696	0.514248
ENSG00000189060.5	0	0.0116348	1
ENSG00000159166.12	-0.0342011	-0.0910049	0.0431488
ENSG00000130066.15	-0.125757	-0.13016	0.00930262
ENSG00000196419.11	0	-0.0491845	0.80719
ENSG00000134294.12	0	-0.00436835	1
ENSG00000121064.11	0	-0.00871162	1
ENSG00000108107.11	0	-0.00924606	1
ENSG00000124145.6	-0.292738	-0.236403	6.18889e-18
ENSG00000120129.5	-0.321309	-0.269019	9.36517e-18
ENSG00000173812.9	0	-0.00426589	1
ENSG00000133636.9	0	0.00258275	1
ENSG00000247627.2	0	-0.0257023	1
ENSG00000166415.13	0.0189316	0.0375701	1
ENSG00000105855.8	0	0.039423	1
ENSG00000167656.4	0	0.00633921	1
ENSG00000169594.11	0.0589984	0.0382885	1
ENSG00000142973.11	-0.737666	-0.656994	0
ENSG00000144713.11	0	-0.00477096	1
ENSG00000022556.14	-0.0348372	-0.0468633	1
ENSG00000134531.8	-0.100822	-0.128671	8.01554e-05
ENSG00000019186.8	-0.0645013	-0.116929	0.214025
ENSG00000142089.14	-0.0918765	-0.0817377	1
ENSG00000167553.13	0.0681978	0.103234	7.11519e-09
ENSG00000141756.17	0	0.107718	0.486477
ENSG00000100097.10	0.00152775	0.0875241	0.244129
ENSG00000136810.11	0.0265408	0.122524	7.56676e-08
ENSG00000173372.15	0	0.034444	1
ENSG00000104341.15	-0.0262422	-0.0937404	0.338806
ENSG00000118705.15	0	-0.0274643	1
ENSG00000004478.7	0.152705	0.156154	1.75326e-13
ENSG00000149131.14	-0.0252683	-0.0431526	1
ENSG00000005022.5	0	0.0122378	1
ENSG00000162738.5	0.0103386	0.0420562	1
ENSG00000181163.12	0	0.015819	1
ENSG00000131711.13	0	0.0293906	1
ENSG00000169714.15	0	0.0407299	1
ENSG00000006210.6	-0.115098	-0.147963	0.000219476
ENSG00000039068.17	-0.0829148	-0.130147	0.00225516
ENSG00000163216.6	0	-0.0216626	1
ENSG00000211640.3	0	-0.038419	1
ENSG00000147065.15	-0.144854	-0.172961	9.55704e-09
ENSG00000148926.8	0.0572928	0.0923771	0.0464152
ENSG00000143933.15	-0.04337	-0.0385821	1
ENSG00000168209.4	0	-0.0131754	1
ENSG00000133392.15	-0.220283	-0.263592	1.27888e-14
ENSG00000065978.16	0.00863756	0.0610307	1
ENSG00000144381.15	0.111406	0.119214	3.60086e-08
ENSG00000073111.12	0.232001	0.198542	1.05715e-24
ENSG00000073756.10	-0.180662	-0.259521	2.34277e-13
ENSG00000224373.3	0	-0.0151815	1
ENSG00000275385.1	-0.131867	-0.209789	4.99109e-11
ENSG00000265190.5	0	0.0442632	1
ENSG00000074211.12	0.0781035	0.129207	7.69305e-05
ENSG00000161202.16	0.0735661	0.100226	4.86189e-09
ENSG00000168028.12	0	-0.0165279	1
ENSG00000123416.14	0.0917049	0.11649	1.12145e-09
ENSG00000204544.5	-0.562315	-0.426487	0
ENSG00000060138.11	0	-0.00975334	1
ENSG00000198755.9	-0.033238	-0.10511	1.7271e-09
ENSG00000196352.12	-0.366422	-0.321762	4.92617e-27
ENSG00000143947.11	0.018649	0.0568113	0.121832
ENSG00000101210.9	0	-0.00913114	1
ENSG00000152558.13	0	-0.0245001	1
ENSG00000130303.11	0	0.0277314	1
ENSG00000130508.9	-0.037847	-0.0490752	1
ENSG00000108953.15	0	0.0146277	1
ENSG00000127022.13	-0.123115	-0.104928	0.00238169
ENSG00000211668.2	0	-0.0242745	1
ENSG00000143375.13	-0.237324	-0.194911	2.5845e-15
ENSG00000100979.13	0	-0.0500543	1
ENSG00000167978.15	-0.0670501	-0.105758	0.0148085
ENSG00000134824.12	0.0422789	0.0866574	1
ENSG00000134755.13	0	0.0406614	1
ENSG00000006534.14	-0.338776	-0.227445	5.50652e-38
ENSG00000197958.11	-0.00246879	-0.0232935	1
ENSG00000241794.1	0.0198759	0.0159679	1
ENSG00000131747.13	0.329235	0.280525	4.48875e-25
ENSG00000188157.12	-0.0922944	-0.127664	0.00523749
ENSG00000159189.10	0	0.0232513	1
ENSG00000110492.14	0	0.0485464	1
ENSG00000187498.13	0	-0.0425882	1
ENSG00000132821.10	-0.297868	-0.220096	7.58816e-18
ENSG00000150753.10	0.0886317	0.0931699	0.00112686
ENSG00000163435.14	-0.227069	-0.220855	3.32451e-12
ENSG00000164587.10	-0.053273	-0.080454	0.000815236
ENSG00000147257.12	-0.0984022	-0.210653	2.49444e-09
ENSG00000141753.6	-0.202456	-0.191995	7.44738e-11
ENSG00000123384.12	-0.0712299	-0.130124	6.78482e-09
ENSG00000008394.11	-0.265607	-0.280741	4.70104e-14
ENSG00000132507.16	0	0.0704735	0.00854617
ENSG00000197747.7	-0.028719	-0.0525568	1
ENSG00000169116.10	-0.484594	-0.46271	0
ENSG00000130702.12	0	0.0333423	1
ENSG00000147604.12	0	-0.049941	1
ENSG00000114391.11	0	0.00276822	1
ENSG00000159399.8	0	-5.21964e-05	1
ENSG00000153292.14	-0.322287	-0.29293	2.57117e-23
ENSG00000149948.12	0.104516	0.104762	0.0166721
ENSG00000187514.13	0	0.0362701	1
ENSG00000167004.11	-0.0542069	-0.092407	0.112711
ENSG00000147676.12	-0.27936	-0.299589	1.8881e-16
ENSG00000101825.7	0	0.07104	0.351695
ENSG00000162511.7	-0.0365144	-0.0546293	0.394106
ENSG00000111319.11	-0.341005	-0.38026	1.23113e-21
ENSG00000125691.11	0	-0.0224402	1
ENSG00000166441.11	-0.0412499	-0.0747073	0.014578
ENSG00000149212.9	-0.14448	-0.240062	2.41843e-18
ENSG00000105825.10	-0.0794832	-0.0833275	1
ENSG00000253729.6	0.0388094	0.0554495	1
ENSG00000071082.9	0	-0.0130141	1
ENSG00000185686.16	0.262124	0.265074	7.73082e-11
ENSG00000063177.11	0	0.0144882	1
ENSG00000129521.12	0.00403012	0.0457125	1
ENSG00000243955.4	-0.161015	-0.240248	1.05583e-16
ENSG00000134363.10	0.0751694	0.0733673	1
ENSG00000134871.16	0	-0.0323074	1
ENSG00000112096.15	0	0.0135781	1
ENSG00000106366.8	0	0.0483006	1
ENSG00000171885.12	-0.853633	-0.856878	0
ENSG00000167460.13	0	0.0522483	1
ENSG00000136942.13	0	0.0773956	0.0118988
ENSG00000077942.16	0	-0.00998817	1
ENSG00000262406.2	0.129779	0.141927	9.57455e-05
ENSG00000008988.8	0	-0.039705	1
ENSG00000115053.14	0	0.0263612	1
ENSG00000130402.10	0	-0.012871	1
ENSG00000172757.11	0	0.034111	1
ENSG00000253755.1	0	0.032357	1
ENSG00000187244.9	-0.327354	-0.329563	4.81295e-18
ENSG00000147889.15	0.0606929	0.101743	1
ENSG00000211959.2	0	0.00721019	1
ENSG00000137573.12	0.0465263	0.115284	2.26539e-05
ENSG00000169710.6	-0.0244775	-0.0986253	1
ENSG00000073792.14	0.0977757	0.120361	0.0130155
ENSG00000092621.10	0.19345	0.178707	1.83265e-10
ENSG00000177954.10	0	-0.017377	1
ENSG00000142798.15	-0.155234	-0.221715	1.50597e-14
ENSG00000151012.12	0.0117592	0.0543818	1
ENSG00000211459.2	0	0.0155362	1
ENSG00000196344.10	0	-0.0522803	1
ENSG00000189143.9	-0.214153	-0.174882	9.15968e-06
ENSG00000105835.10	0	0.0414424	1
ENSG00000103811.14	-0.491754	-0.484644	0
ENSG00000119655.7	-0.486329	-0.419835	0
ENSG00000148180.15	-0.130319	-0.138903	0.000593329
ENSG00000112306.7	0	-0.0377692	1
ENSG00000103222.17	0	0.0550412	1
ENSG00000160932.9	-0.0801445	-0.0955286	1
ENSG00000099994.10	-0.597541	-0.538248	0
ENSG00000169429.9	0	-0.0504249	1
ENSG00000156976.13	0	0.0349881	1
ENSG00000117472.8	-0.347914	-0.355751	2.69437e-29
ENSG00000146648.14	-0.028926	-0.103284	1
ENSG00000182774.9	0	0.0164789	1
ENSG00000135678.10	-0.398359	-0.324823	1.39316e-31
ENSG00000167642.11	0	-0.0393176	1
ENSG00000131469.11	0	0.0199704	1
ENSG00000115415.17	0.0775577	0.191287	7.43301e-10
ENSG00000092068.17	0	-0.0725223	1
ENSG00000120738.7	-0.115515	-0.179268	4.84962e-05
ENSG00000117450.12	0	0.0756378	0.229767
ENSG00000103534.15	-0.51751	-0.491075	0
ENSG00000163931.14	-0.0738425	-0.0685666	1
ENSG00000188153.11	0	-0.0405557	1
ENSG00000044574.7	-0.0648309	-0.0683092	1
ENSG00000211949.3	0	0.00286308	1
ENSG00000163209.13	0	-0.0375787	1
ENSG00000143416.19	-0.621194	-0.575388	0
ENSG00000204262.10	0.0310439	0.104453	1.84285e-07
ENSG00000138326.17	0	-0.0155261	1
ENSG00000171603.15	0	-0.00442277	1
ENSG00000157227.11	0	0.100823	0.000138817
ENSG00000179869.13	-0.0080022	-0.126493	0.000369404
ENSG00000121858.9	-0.035717	-0.0800727	1
ENSG00000126709.13	0	0.035302	1
ENSG00000057149.13	0.000745459	0.0301588	1
ENSG00000203697.10	-0.616443	-0.537424	0
ENSG00000102554.12	-0.0523925	-0.11408	0.000136115
ENSG00000100342.19	0	-0.0207125	1
ENSG00000197641.10	0.0269018	0.0173025	1
ENSG00000171863.11	0.0639205	0.0767827	0.000860551
ENSG00000119888.9	-0.0068697	-0.0325443	1
ENSG00000178919.8	0.0888582	0.111366	0.000170723
ENSG00000068650.17	-0.396439	-0.363797	0
ENSG00000167526.12	-0.0196379	-0.025902	1
ENSG00000229415.8	-0.667241	-0.723749	0
ENSG00000046604.11	0.00184067	0.0431821	1
ENSG00000060718.17	0.20872	0.281463	1.92994e-27
ENSG00000144476.5	0.0261932	0.0511781	1
ENSG00000139644.11	-0.215558	-0.172065	2.56724e-17
ENSG00000182326.13	0	0.00873754	1
ENSG00000170465.9	0.036959	0.0514989	0.17693
ENSG00000138755.5	0.17816	0.257329	9.28881e-18
ENSG00000211651.3	-0.00503124	-0.0440379	1
ENSG00000136156.11	-0.142738	-0.141889	3.16949e-06
ENSG00000122406.11	0	-0.0352583	1
ENSG00000116285.11	-0.120419	-0.131917	0.000420114
ENSG00000162981.13	0	-0.0673942	1
ENSG00000173369.14	0	0.0236768	1
ENSG00000026025.12	-0.0863248	-0.104992	0.00147382
ENSG00000185033.13	-0.0274295	-0.0967699	0.0656814
ENSG00000166598.11	0	-0.00713988	1
ENSG00000140988.14	0	-0.0244489	1
ENSG00000197635.8	-0.395977	-0.356047	1.70958e-43
ENSG00000137440.4	0	0.00828063	1
ENSG00000211945.2	0	0.00292415	1
ENSG00000109062.8	0	0.0201047	1
ENSG00000143153.11	-0.289579	-0.309694	1.94399e-17
ENSG00000053747.14	0	-0.0926526	1
ENSG00000211644.2	0	-0.0277019	1
ENSG00000118515.10	-0.0131667	-0.103939	0.0575156
ENSG00000099953.8	0.0640516	0.168971	1.86728e-05
ENSG00000256612.6	-0.662332	-0.657073	0
ENSG00000171903.15	0.0180571	0.0703344	1
ENSG00000204628.10	-0.068237	-0.0850026	0.0274213
ENSG00000084234.15	-0.294197	-0.279504	4.51563e-20
ENSG00000143819.11	-0.278284	-0.261016	9.64173e-16
ENSG00000197142.9	-0.377729	-0.321917	0
ENSG00000181143.14	0	-0.00875976	1
ENSG00000142937.10	-0.0161807	-0.0432336	1
ENSG00000130203.8	0	0.046888	1
ENSG00000158710.13	-0.0849298	-0.10267	0.194081
ENSG00000074181.7	0	0.0580436	1
ENSG00000170345.8	-0.340363	-0.3453	8.56319e-19
ENSG00000124102.4	0.0777802	0.109333	0.0131072
ENSG00000198959.10	-0.286476	-0.280932	7.77125e-23
ENSG00000240583.9	-0.583672	-0.635002	0
ENSG00000178209.13	-0.0138082	-0.058894	1
ENSG00000198840.2	0	0.0408843	1
ENSG00000211659.2	0	0.0318084	1
ENSG00000111799.19	0.0995819	0.177185	1.34199e-11
ENSG00000211660.3	0	-0.0238638	1
ENSG00000160213.5	-0.0271889	-0.0539958	1
ENSG00000083845.7	0	-0.010903	1
ENSG00000142949.15	-0.0023455	-0.0657814	1
ENSG00000142156.13	0.0253011	0.145953	2.52555e-07
ENSG00000160211.14	0	0.076416	0.57732
ENSG00000105193.7	0	-0.00614488	1
ENSG00000186340.13	0	0.0555099	1
ENSG00000182795.12	-0.57599	-0.515426	0
ENSG00000069122.17	-0.581983	-0.559433	0
ENSG00000272398.4	-0.0226163	-0.0789666	1
ENSG00000204580.10	-0.0513545	-0.120303	0.000131319
ENSG00000116133.10	-0.362959	-0.400818	1.78237e-36
ENSG00000188643.9	-0.00112034	-0.0297384	1
ENSG00000111057.9	-0.0280323	-0.049716	1
ENSG00000198363.14	0	-0.0468325	1
ENSG00000090339.7	-0.312484	-0.282112	1.74287e-27
ENSG00000147689.15	-0.10772	-0.184639	8.07127e-06
ENSG00000127954.11	-0.575697	-0.557371	0
ENSG00000116299.15	-0.282257	-0.298953	3.60043e-18
ENSG00000108298.8	0	-0.00251177	1
ENSG00000159212.11	-0.469357	-0.468014	1.84271e-42
ENSG00000156535.12	0	0.0556067	1
ENSG00000176907.4	-0.408851	-0.423458	9.22017e-34
ENSG00000211653.2	0	-0.00865342	1
ENSG00000185633.9	0	-0.0198531	1
ENSG00000204592.8	-0.106196	-0.117207	2.84673e-07
ENSG00000110955.7	0.023352	0.0703908	0.0276985
ENSG00000122861.14	0.0207488	0.125777	0.00238731
ENSG00000115648.12	-0.49347	-0.471882	0
ENSG00000096088.15	-0.721863	-0.849036	0
ENSG00000111716.11	0	-0.0366233	1
ENSG00000196735.10	-0.0680879	-0.0837508	0.00860631
ENSG00000120708.15	0	0.0493834	1
ENSG00000038427.14	0	0.00730678	1
ENSG00000169908.9	-0.0792592	-0.109875	1
ENSG00000189334.7	-0.185971	-0.264354	8.73736e-09
ENSG00000135821.15	-0.183851	-0.2206	7.9205e-10
ENSG00000167600.12	-0.0237091	-0.0910018	0.249129
ENSG00000115758.11	0	-0.0720211	1
ENSG00000204385.9	-0.578787	-0.544911	0
ENSG00000137309.18	0.149119	0.21704	8.14758e-16
ENSG00000161055.3	-0.626405	-0.674468	0
ENSG00000123838.9	-0.795321	-0.990379	0
ENSG00000211898.6	-0.13542	-0.175263	0.00067213
ENSG00000242265.4	0	-0.0466915	1
ENSG00000108679.11	-0.193981	-0.195912	4.40681e-05
ENSG00000145423.4	0	0.0233992	1
ENSG00000165215.6	-0.183237	-0.149001	7.30573e-07
ENSG00000062038.12	0	0.00710538	1
ENSG00000179344.15	-0.170202	-0.145391	1.17847e-06
ENSG00000110321.14	-0.0553983	-0.113472	3.90607e-05
ENSG00000114770.15	0.021189	0.0494679	1
ENSG00000110195.10	-0.684252	-0.704907	0
ENSG00000120885.18	-0.228034	-0.304312	1.15156e-11
ENSG00000175166.15	0.0623848	0.110477	3.2452e-07
ENSG00000155380.10	0.2209	0.193632	2.34335e-19
ENSG00000183347.14	0	-0.00219914	1
ENSG00000068078.16	-0.104622	-0.196221	2.32949e-08
ENSG00000254709.5	0	-0.00400341	1
ENSG00000185624.13	-0.0631128	-0.110834	0.00245603
ENSG00000198034.9	-0.0654191	-0.12162	0.000160046
ENSG00000048540.13	-0.64981	-0.648356	0
ENSG00000211663.2	0	-0.0256675	1
ENSG00000163399.14	-0.240673	-0.322074	1.06051e-24
ENSG00000179218.12	-0.0543191	-0.0713046	0.85754
ENSG00000259803.5	-0.639004	-0.642086	0
ENSG00000142534.5	0	-0.02283	1
ENSG00000198502.5	-0.198225	-0.201203	6.06253e-15
ENSG00000211666.2	0	-0.0199359	1
ENSG00000105220.13	0.0903393	0.127188	1.82694e-06
ENSG00000145592.12	0	-0.0127762	1
ENSG00000148346.10	-0.214697	-0.250242	1.18716e-08
ENSG00000185567.6	-0.02576	-0.114795	0.250532
ENSG00000149021.5	-0.525744	-0.573261	0
ENSG00000087245.11	0	-0.0479401	1
ENSG00000012223.11	-0.541285	-0.711616	0
ENSG00000130635.14	0	0.0080197	1
ENSG00000005884.16	-0.214182	-0.235502	1.66501e-11
ENSG00000106624.7	0	0.0547174	1
ENSG00000134333.12	0	-0.00537346	1
ENSG00000189377.7	-0.654145	-0.716871	0
ENSG00000161203.12	0	0.0609186	0.661237
ENSG00000117595.9	0	0.00304973	1
ENSG00000137801.10	-0.112543	-0.171554	1.71509e-07
ENSG00000114867.18	0	0.00628528	1
ENSG00000167996.14	0	0.00369994	1
ENSG00000196188.9	-0.813858	-1.07791	0
ENSG00000147403.15	-0.0981961	-0.121224	4.30945e-06
ENSG00000105372.5	0	0.0637634	1
ENSG00000182899.13	0.0451027	0.0774787	0.00569925
ENSG00000102144.12	0	0.0367274	1
ENSG00000133110.13	0	0.0555547	1
ENSG00000265972.4	-0.312253	-0.286803	3.53163e-16
ENSG00000087460.22	0	0.00407847	1
ENSG00000148303.15	0	-0.00513954	1
ENSG00000143320.7	-0.0370086	-0.0802326	1
ENSG00000121742.14	0.0377232	0.0643508	1
ENSG00000143546.8	0	0.0513202	1
ENSG00000142192.19	0	-0.0473813	1
ENSG00000142173.13	0	0.112733	0.000365203
ENSG00000223865.9	-0.219434	-0.232068	0
ENSG00000174444.13	0	-0.0299238	1
ENSG00000108846.14	-0.227106	-0.208575	1.49705e-10
ENSG00000211966.2	0	-0.0283998	1
ENSG00000145113.20	-0.29504	-0.370184	1.51478e-17
ENSG00000196260.3	-0.644508	-0.787363	0
ENSG00000184292.6	-0.129853	-0.178358	8.05792e-05
ENSG00000111669.13	0.0574957	0.090658	0.00448706
ENSG00000101443.16	-0.589804	-0.710537	0
ENSG00000167972.12	-0.701522	-0.756	0
ENSG00000163191.5	0	0.0424574	1
ENSG00000142657.19	0.0028949	0.0704164	1
ENSG00000145824.11	-0.178256	-0.267446	2.02686e-06
ENSG00000074410.12	0.00856488	0.0524477	1
ENSG00000196611.4	0.0268964	0.103364	1
ENSG00000187908.14	-0.758204	-0.936009	0
ENSG00000069849.9	0.063861	0.106498	2.42488e-05
ENSG00000171476.20	-0.598444	-0.639405	0
ENSG00000205542.9	-0.156743	-0.158641	0.00193107
ENSG00000124107.5	-0.416251	-0.531221	3.09753e-32
ENSG00000196230.11	0.0858647	0.139897	2.50844e-07
ENSG00000198183.10	-0.295209	-0.290829	2.39287e-11
ENSG00000087494.14	0.0492842	0.0373396	1
ENSG00000153446.14	-0.805359	-0.917517	0
ENSG00000001084.9	0.149867	0.201592	2.13161e-09
ENSG00000198848.11	-0.0459987	-0.143183	0.0371602
ENSG00000100316.14	-0.0734936	-0.160221	8.59039e-11
ENSG00000129824.14	0.0640779	0.105601	1
ENSG00000101144.11	0	-0.0479175	1
ENSG00000026508.15	-0.0136929	-0.09054	1
ENSG00000109971.12	0	-0.0709082	1
ENSG00000034510.5	0	0.0399135	1
ENSG00000142541.15	-0.0172895	-0.0836678	0.497893
ENSG00000149273.13	0	0.00807231	1
ENSG00000070087.12	0.23509	0.230353	4.77816e-14
ENSG00000131746.11	0	0.0396163	1
ENSG00000096384.18	0	0.0561006	1
ENSG00000121552.3	0	0.0439595	1
ENSG00000129538.12	-0.475136	-0.505717	0
ENSG00000084207.14	0	-0.0416689	1
ENSG00000196878.11	-0.100044	-0.195572	0.000551665
ENSG00000182492.14	-0.050619	-0.054514	1
ENSG00000211662.2	0	0.0222209	1
ENSG00000103257.7	0.168051	0.227293	2.86687e-10
ENSG00000117984.11	-0.295336	-0.322762	4.23198e-30
ENSG00000169469.8	0	-0.0309892	1
ENSG00000080824.17	0.00327418	0.0532926	1
ENSG00000164924.16	0	0.0298766	1
ENSG00000170421.10	-0.0273703	-0.0549998	1
ENSG00000011465.15	-0.0922302	-0.205434	1.03196e-06
ENSG00000137648.15	-0.19448	-0.297566	7.457e-11
ENSG00000245532.5	-0.120634	-0.167379	0.133586
ENSG00000171557.15	-0.487376	-0.653435	0
ENSG00000198695.2	-0.212968	-0.247663	8.02012e-15
ENSG00000133661.14	-0.840639	-0.953249	0
ENSG00000124942.12	-0.135849	-0.195813	1.44323e-05
ENSG00000103044.9	-0.132845	-0.246598	3.54402e-12
ENSG00000165092.11	-0.0525358	-0.14489	0.0584196
ENSG00000165474.5	0.00672433	0.0825299	1
ENSG00000148053.14	0	-0.0375895	1
ENSG00000211679.2	0	-0.00652023	1
ENSG00000272620.1	-0.132843	-0.122504	0.298777
ENSG00000198431.14	0.00929939	0.119423	0.0273187
ENSG00000124466.8	0.116449	0.204698	4.205e-15
ENSG00000135046.12	-0.0123557	-0.0642635	1
ENSG00000013588.5	-0.530009	-0.649599	0
ENSG00000100345.19	-0.0888249	-0.154182	1.63367e-06
ENSG00000099194.5	0	-0.0253063	1
ENSG00000115461.4	0	-0.0569235	1
ENSG00000243466.1	0	0.0157219	1
ENSG00000163993.6	-0.114383	-0.138787	0.0358545
ENSG00000137154.11	0	-0.0493669	1
ENSG00000241351.2	0	-0.0115954	1
ENSG00000196924.13	-0.109539	-0.1975	5.41111e-07
ENSG00000151914.16	0	0.0264533	1
ENSG00000230937.8	0.0454221	0.0631598	1
ENSG00000125999.9	-0.442347	-0.512051	5.16269e-29
ENSG00000106278.10	0	-0.083442	1
ENSG00000164265.7	-0.86993	-1.15013	0
ENSG00000231389.6	-0.191102	-0.223417	4.22346e-32
ENSG00000137818.10	0	0.00285138	1
ENSG00000211890.3	-0.149153	-0.229054	2.68707e-10
ENSG00000182718.15	-0.050857	-0.0898125	0.247896
ENSG00000171401.13	0	-0.0770582	1
ENSG00000132470.12	-0.0269331	-0.0798722	1
ENSG00000137975.7	0	-0.0167576	1
ENSG00000206503.10	0	0.00829046	1
ENSG00000152661.7	0	-0.141762	0.00274911
ENSG00000181019.11	0	0.0171332	1
ENSG00000115884.9	-0.163552	-0.240509	2.9261e-10
ENSG00000136352.16	-0.573132	-0.698796	0
ENSG00000165949.11	0	0.0645395	1
ENSG00000239951.1	0	-0.022311	1
ENSG00000161016.14	0	-0.021462	1
ENSG00000163359.14	-0.0274066	-0.0985696	0.000269845
ENSG00000149925.15	0	0.0486417	1
ENSG00000139329.4	-0.0842596	-0.175958	0.00123269
ENSG00000047457.12	-0.398624	-0.507989	4.59624e-22
ENSG00000091409.13	0.040212	0.0849435	1
ENSG00000204525.13	0	0.0331009	1
ENSG00000075618.16	0.0828732	0.179181	4.39472e-09
ENSG00000197956.8	-0.119829	-0.165708	0.00989667
ENSG00000070756.12	0	-0.0327286	1
ENSG00000167658.14	-0.0754654	-0.167316	3.71901e-06
ENSG00000173801.15	0	0.0224666	1
ENSG00000211677.2	0	0.000643087	1
ENSG00000211598.2	0	0.0182175	1
ENSG00000175899.13	-0.420595	-0.543535	0
ENSG00000196126.9	-0.215189	-0.244531	3.51356e-29
ENSG00000197746.12	-0.054563	-0.0832162	1
ENSG00000154277.11	0.237863	0.257763	4.811e-13
ENSG00000231500.5	-0.0135153	-0.0574221	1
ENSG00000063660.7	0	0.053127	1
ENSG00000074800.12	0	0.0131492	1
ENSG00000106211.8	0	0.0445868	1
ENSG00000178363.4	0.092525	0.106332	0.00488672
ENSG00000075624.12	0	-0.0158475	1
ENSG00000101384.10	0.0524972	0.0874675	0.0378231
ENSG00000153395.8	-0.381818	-0.473072	1.54143e-44
ENSG00000058085.13	0	-0.0232531	1
ENSG00000113140.9	0	-0.0421259	1
ENSG00000090382.5	-0.0298275	-0.0905873	1
ENSG00000181449.3	0.0227298	0.0428909	1
ENSG00000089157.14	0	0.0342508	1
ENSG00000198786.2	-0.161259	-0.237457	6.61508e-15
ENSG00000198899.2	0	0.0778318	1
ENSG00000146674.13	0.00257456	0.105216	1
ENSG00000133112.15	-0.182736	-0.245326	3.09717e-14
ENSG00000186847.5	0.0550246	0.110446	0.0442817
ENSG00000010278.10	-0.0133722	-0.0769512	1
ENSG00000198888.2	-0.0407675	-0.076112	1
ENSG00000130821.14	0.0712631	0.106362	0.0165893
ENSG00000164733.19	-0.0122789	-0.0448146	1
ENSG00000206075.12	0.101906	0.143475	0.00053539
ENSG00000089356.15	-0.0719489	-0.144258	0.0298713
ENSG00000165272.13	-0.521846	-0.727152	0
ENSG00000086570.11	0	0.0165636	1
ENSG00000125730.15	-0.451287	-0.658218	0
ENSG00000108602.16	-0.0300233	-0.117907	0.0188601
ENSG00000175793.11	0	-0.0152038	1
ENSG00000072274.11	0.174816	0.259679	5.32302e-15
ENSG00000067225.16	0	0.0245579	1
ENSG00000198763.3	0.0148064	0.134329	0.0191796
ENSG00000132465.9	-0.228235	-0.376007	4.45193e-42
ENSG00000102854.13	-0.417513	-0.507989	1.29083e-27
ENSG00000163347.5	-0.0175602	-0.0767971	1
ENSG00000197249.11	-0.553318	-0.857741	0
ENSG00000041982.13	-0.0475719	-0.154953	1
ENSG00000106541.10	-0.529313	-0.746438	0
ENSG00000162896.5	-0.739724	-1.19233	0
ENSG00000185479.5	0.0738567	0.12278	2.56593e-06
ENSG00000117983.16	-0.46306	-0.618262	2.03641e-31
ENSG00000184009.8	0	0.00791787	1
ENSG00000065618.15	-0.102686	-0.22261	4.14098e-06
ENSG00000198727.2	0	-0.00291509	1
ENSG00000198712.1	0.0168436	0.124944	0.00128939
ENSG00000198804.2	-0.0453124	-0.144279	0.0902921
ENSG00000198074.8	0.0373064	0.0940195	0.866753
ENSG00000096696.12	0.107916	0.19885	0.0109119
ENSG00000136235.14	0	-0.0108681	1
ENSG00000114270.14	0.142855	0.196773	3.80721e-11
ENSG00000211892.3	0	0.00915025	1
ENSG00000198886.2	0.0170832	0.0769289	1
ENSG00000166710.16	0	0.0255558	1
ENSG00000204287.12	-0.181136	-0.285164	2.40646e-40
ENSG00000110400.9	0	-0.0139296	1
ENSG00000234745.8	0	0.0650147	1
ENSG00000134757.4	0.0939674	0.104582	2.05695e-06
ENSG00000196139.10	0	-0.0146078	1
ENSG00000135480.13	-0.369777	-0.554551	8.04741e-32
ENSG00000198938.2	0	0.0511081	1
ENSG00000171345.12	-0.130526	-0.2807	0.000186773
ENSG00000211893.3	0	0.00615074	1
ENSG00000156508.16	-0.0741958	-0.218593	2.50093e-10
ENSG00000185499.15	-0.542515	-0.779368	0
ENSG00000115457.8	-0.074263	-0.248292	0.000178121
ENSG00000211897.6	0	0.0425558	1
ENSG00000104419.13	-0.0094057	-0.0993597	1
ENSG00000210082.2	-0.0150051	-0.0554087	1
ENSG00000171346.12	-0.0335276	-0.155754	0.340931
ENSG00000118785.12	0.0174746	0.14072	1
ENSG00000105388.13	-0.297799	-0.484198	2.09139e-12
ENSG00000211899.6	-0.0221482	-0.0657117	1
ENSG00000134762.15	0.0847925	0.116783	3.1373e-05
ENSG00000164692.16	0	0.0329103	1
ENSG00000163220.10	-0.0121597	-0.0735974	1
ENSG00000087086.12	-0.0285041	-0.121586	1
ENSG00000196754.9	0	0.0193221	1
ENSG00000186832.7	0.0519562	0.156414	5.57667e-06
ENSG00000112378.11	0.022212	0.113704	0.0030895
ENSG00000176153.11	0	3.23822e-05	1
ENSG00000115414.17	-0.0167099	-0.0748806	1
ENSG00000117394.18	0.12858	0.242517	4.89748e-12
ENSG00000019582.13	-0.226409	-0.40345	1.4013e-45
ENSG00000187134.11	0	-0.0562844	1
ENSG00000111640.13	0.106197	0.244893	1.67232e-10
ENSG00000168542.11	0	0.0120932	1
ENSG00000137699.15	0	0.0560419	1
ENSG00000157765.10	-0.784224	-1.78731	0
ENSG00000073282.11	0	0.0282547	1
ENSG00000131400.6	-0.844222	-1.80146	0
ENSG00000108821.12	0	0.104843	1
ENSG00000168484.11	-0.749805	-1.34675	0
ENSG00000086548.8	-0.5401	-1.04271	0
ENSG00000151632.15	0	0.0359352	1
ENSG00000211895.4	-0.16776	-0.439435	1.30962e-18
ENSG00000122852.13	-0.988003	-2.52457	0
ENSG00000081277.10	0	-0.0472189	1
ENSG00000211592.5	0	0.0127413	1
ENSG00000185303.14	-0.994198	-2.76298	0
ENSG00000168878.15	-0.969899	-3.49139	0
ENSG00000211896.5	0.0609978	0.273263	5.79217e-09
ENSG00000128422.14	0.0119915	0.0980063	1
ENSG00000205420.9	0.0544024	0.184841	0.145902
ENSG00000186081.10	0.00928901	0.061423	1

## Sheet: cn_DNA Replication
Aberration	funcSFA Coefficient	OLS Coefficient	p
Gain0	-0.0225441	-0.0299416	1
Gain1	0	-0.00435899	1
Gain2	0.0752382	0.127938	1
Gain3	0.0431899	0.0916804	1
Gain4	0	0.0154344	1
Gain5	0.0892782	0.0724672	1
Gain6	0.0600678	0.0481126	1
Gain7	0.0426688	0.029825	1
Gain8	0.0654924	0.0621858	1
Gain9	-0.0484683	-0.0623015	1
Gain10	0.224238	0.351823	2.19505e-10
Gain11	0.218663	0.350757	3.68492e-11
Gain12	0.198285	0.385304	1.68406e-08
Gain13	0.192883	0.303322	8.91817e-08
Gain14	-0.013121	-0.0504219	1
Gain15	-0.00798788	-0.0414771	1
Gain16	0	-0.000247215	1
Gain17	0	-0.00777693	1
Gain18	0.0433939	0.061925	1
Gain19	0.0185499	0.034285	1
Gain20	0	-0.0135748	1
Gain21	-0.00509755	-0.0349177	1
Gain22	0.0405031	0.0810357	1
Gain23	0.0438048	0.100144	1
Gain24	0.0835954	0.0840822	1
Gain25	0.0362105	0.0495995	1
Gain26	0.00110104	-0.000856185	1
Gain27	0	-0.0152756	1
Gain28	0.0108654	0.0200889	1
Gain29	0	-0.0373548	1
Gain30	0	-0.0347672	1
Gain31	0	0.0144527	1
Gain32	0.04104	0.0818786	1
Gain33	0.0750881	0.102171	1
Gain34	0.00679385	0.059948	1
Gain35	0.0427948	0.0694043	1
Gain36	-0.0450867	-0.0846061	1
Gain37	0.167732	0.297238	0.112194
Gain38	0.00503696	0.0612677	1
Gain39	0	0.0227161	1
Gain40	-0.0382223	-0.062429	1
Gain41	0.102027	0.0920166	1
Gain42	0.0606	0.0551912	1
Gain43	0.0965663	0.107027	1
Gain44	0.00334875	0.0494525	1
Gain45	0	0.00274694	1
Gain46	0.03314	0.0586281	1
Gain47	0.00829945	0.0478236	1
Gain48	0.0132192	0.046107	1
Gain49	0	0.0256584	1
Gain50	0	-0.0102938	1
Gain51	0.061151	0.0890338	1
Gain52	0.0519993	0.120842	1
Gain53	0.120333	0.167356	0.140949
Gain54	0.0691444	0.107619	0.828388
Gain55	0.03662	0.0408261	1
Gain56	0.0721459	0.083095	1
Gain57	0.0853169	0.112229	1
Gain58	0.134084	0.156211	1
Gain59	0.0776773	0.0885026	1
Gain60	0.035673	0.059396	1
Gain61	0.0486051	0.0480982	1
Gain62	0.066911	0.0669734	1
Gain63	0.203947	0.196297	0.00212026
Gain64	0.0228261	0.044025	1
Gain65	0.00134708	0.0420495	1
Gain66	-0.0676094	-0.0972825	1
Gain67	0.0359446	0.0613454	1
Gain68	-0.00756278	-0.0241892	1
Gain69	0	0.0145606	1
Loss70	-0.0922803	-0.113543	1
Loss71	-0.0464224	-0.0522694	1
Loss72	-0.0962097	-0.0837107	1
Loss73	-0.097908	-0.0861624	1
Loss74	-0.0750922	-0.0724312	1
Loss75	-0.147104	-0.162188	0.468239
Loss76	-0.0975942	-0.078078	1
Loss77	-0.0809153	-0.0857381	1
Loss78	-0.152847	-0.105441	0.479033
Loss79	-0.175189	-0.173557	0.010552
Loss80	-0.203308	-0.15609	0.000256708
Loss81	-0.201199	-0.170708	0.00066208
Loss82	-0.134792	-0.126712	0.450784
Loss83	-0.0987322	-0.12127	1
Loss84	-0.160417	-0.139959	0.0471402
Loss85	-0.040312	-0.0820981	1
Loss86	-0.0757134	-0.0944443	1
Loss87	-0.092507	-0.0694314	1
Loss88	-0.0264149	-0.0548354	1
Loss89	-0.0389395	-0.0431011	1
Loss90	-0.0587896	-0.0810068	1
Loss91	-0.0883952	-0.0921661	1
Loss92	-0.109378	-0.120126	1
Loss93	-0.186145	-0.164011	0.000144484
Loss94	-0.15376	-0.149808	0.0130432
Loss95	-0.128813	-0.12658	0.122659
Loss96	-0.169345	-0.146495	0.00130568
Loss97	-0.100828	-0.0989509	1
Loss98	-0.133801	-0.144053	0.23102
Loss99	-0.153938	-0.156535	0.00740369
Loss100	-0.142367	-0.151654	0.0388551
Loss101	-0.0957019	-0.0893356	1
Loss102	0.132369	0.135409	0.28929
Loss103	0.0734726	0.0919922	1
Loss104	0.0851882	0.0899695	1
Loss105	0.0818936	0.0856041	1
Loss106	0.101492	0.101966	1
Loss107	0.0926837	0.101184	1
Loss108	0	0.0341868	1
Loss109	-0.163484	-0.235225	0.286852
Loss110	-0.158349	-0.235862	0.279202
Loss111	-0.154116	-0.209536	0.195785
Loss112	-0.119208	-0.153568	1
Loss113	-0.127879	-0.161965	0.339955
Loss114	0	0.0202113	1
Loss115	0.00269208	0.0264914	1
Loss116	0	0.00974346	1
Loss117	0.0242075	0.0547749	1
Loss118	0.0253756	0.0617425	1
Loss119	0	0.0341193	1
Loss120	-0.02558	-0.0923368	1
Loss121	0.0352201	0.0540824	1
Loss122	0.0389862	0.0541355	1
Loss123	-0.0108367	-0.0388778	1
Loss124	0	-0.00405572	1
Loss125	0	0.00748817	1
Loss126	0	0.0390883	1
Loss127	0.00552853	0.0591369	1
Loss128	0	0.0315255	1
Loss129	0	0.00229261	1
Loss130	0	0.044726	1
Loss131	0	0.0488977	1
Loss132	0	-0.00177841	1
Loss133	0	0.0136679	1
Loss134	0	0.00610769	1
Loss135	-0.00390735	-0.0158975	1
Loss136	-0.0546666	-0.052533	1
Loss137	-0.0414286	-0.0456052	1
Loss138	-0.00745659	-0.023448	1
Loss139	-0.0137136	-0.0274766	1
Loss140	-0.0414118	-0.0467147	1
Loss141	-0.0161152	-0.0385313	1
Loss142	-0.0312294	-0.0474645	1
Loss143	-0.0191006	-0.0338781	1
Loss144	-0.185675	-0.154922	0.00018665
Loss145	0	0.0210059	1
Loss146	0	0.0299427	1
Loss147	0	0.00166281	1
Loss148	0	0.0397941	1
Loss149	-0.0520927	-0.0567482	1
Loss150	-0.0293296	-0.0393789	1
Loss151	-0.00909052	-0.022088	1
Loss152	-0.0319488	-0.0580733	1
Loss153	0.0510881	0.0599663	1
Loss154	0.0969928	0.0850989	1
Loss155	0.0941046	0.12962	1
Loss156	0.125644	0.104368	0.331843
Loss157	0.00823666	0.0735544	1
Loss158	0	0.0190332	1
Loss159	-0.021872	-0.0219691	1
Loss160	-0.0111644	-0.016148	1
Loss161	-0.00213457	-0.00379918	1
Loss162	0	0.0428608	1
Loss163	0	0.0617621	1
Loss164	0	0.0219701	1
Loss165	0.00451407	0.0391483	1
Loss166	0	-0.0168729	1
Loss167	0	-0.0138784	1
Loss168	0	-0.0159312	1
Loss169	0	-0.00945756	1
Loss170	-0.0481175	-0.0926328	1
Loss171	-0.0402869	-0.087135	1
Loss172	-0.202304	-0.149795	0.00683687
Loss173	-0.140368	-0.118067	1
Loss174	-0.198017	-0.157633	0.00686226
Loss175	-0.211165	-0.17846	0.00364048
Loss176	-0.031294	-0.0370697	1
Loss177	-0.00546057	-0.0193735	1
Loss178	-0.0258589	-0.0434272	1
Loss179	-0.0695564	-0.0869375	1
Loss180	0	0.0028637	1
Loss181	0	0.00262337	1
Loss182	0	0.0162711	1
Loss183	-0.101554	-0.123262	0.272094
Loss184	-0.0872083	-0.126078	1
Loss185	-0.00861868	-0.0647241	1
Loss186	-0.0272705	-0.0840141	1
Loss187	-0.0911876	-0.11592	1
Loss188	0	-0.0532497	1
Loss189	0.0130361	0.02967	1
Loss190	0.00874389	0.0254097	1
Loss191	0.0127249	0.0322081	1
Loss192	0.00671145	0.0203728	1
Loss193	0	0.00744802	1
Loss194	0	-0.0304048	1
Loss195	0.0345275	0.0407898	1
Loss196	0.0618334	0.0764915	1
Loss197	0.0540816	0.0541164	1
Loss198	0.00803539	0.0100425	1
Loss199	0.0717799	0.0644499	1
Loss200	-0.0908951	-0.111816	1
Loss201	-0.0601305	-0.0683967	1
Loss202	-0.0961135	-0.0714082	1
Loss203	-0.104638	-0.0758987	1
Loss204	-0.00906546	-0.069106	1
Loss205	-0.0893411	-0.155396	0.779171
Loss206	-0.0493924	-0.118744	1
Loss207	0	-0.00312892	1
Loss208	0	0.0331737	1
Loss209	0	0.0465709	1
Loss210	0.0138656	0.059724	1
Loss211	0	0.0417362	1
Loss212	0	0.0263284	1

## Sheet: rppa_Immune
Epitope	funcSFA Coefficient	OLS Coefficient	p
14-3-3_beta	-0.00790234	-0.0166373	1
14-3-3_epsilon	-0.0750049	-0.047986	0.0713597
14-3-3_zeta	-0.267299	-0.295406	2.82115e-09
4E-BP1	-0.233111	-0.255371	2.52705e-06
4E-BP1_pS65	-0.187295	-0.0960004	0.00180324
4E-BP1_pT37_T46	-0.112376	-0.159257	1
4E-BP1_pT70	-0.0549022	-0.0513218	1
53BP1	0	0.00666335	1
A-Raf	0.0109015	0.0156762	1
A-Raf_pS299	-0.0185495	-0.0507556	1
ACC1	-0.185039	-0.225937	0.0105861
ACC_pS79	-0.141323	-0.157063	0.431336
ACVRL1	0	-0.00728777	1
ADAR1	0.0324548	0.0408916	1
AMPK_alpha	-0.133043	-0.077634	0.81999
AMPK_pT172	0.0715014	0.0866494	1
AR	0	0.0120365	1
ARID1A	0	0.000708283	1
ASNS	-0.103717	-0.157679	1
ATM	0.353134	0.517648	1.41634e-22
Acetyl-a-Tubulin-Lys40	-0.0246932	-0.0559607	1
Akt	0.123786	0.165701	7.91424e-05
Akt_pS473	0	-0.00576652	1
Akt_pT308	-0.15139	-0.161851	0.416603
Annexin-1	0.0257058	0.0541323	1
Annexin_VII	-0.0489246	-0.031133	1
B-Raf	0.098063	0.127553	0.0551519
B-Raf_pS445	-0.0506325	-0.0677776	1
BRD4	0.0259842	0.0603132	1
Bad_pS112	0	0.0201451	1
Bak	0.00949909	0.0166405	1
Bap1-c-4	-0.0202873	-0.029792	1
Bax	0	-0.0420437	1
Bcl-2	0.275548	0.28219	6.0895e-09
Bcl-xL	0.0151617	0.00591463	1
Bcl2A1	-0.00646501	-0.0189553	1
Beclin	0.0325686	0.0491843	1
Bid	0	-0.0166103	1
Bim	0.0700994	0.086923	1
C-Raf	0.184337	0.0998859	9.47444e-08
C-Raf_pS338	-0.011716	-0.0295117	1
CD20	0	-0.00259952	1
CD26	-0.0528558	-0.079384	1
CD31	0.0240671	0.0376968	1
CD49b	-0.197535	-0.198192	0.000180909
CDK1	-0.0970514	-0.0537247	1
CDK1_pY15	-0.0792743	-0.049267	1
COG3	0.112187	0.104854	0.0742569
Caspase-3	-0.213081	-0.141991	1.67628e-05
Caspase-7_cleavedD198	0.362048	0.499923	5.34755e-15
Caspase-8	0.0231978	0.0502692	1
Caveolin-1	0.0570643	0.117035	1
Chk1	-0.123831	-0.0964249	0.0503983
Chk1_pS296	0	-0.00514517	1
Chk1_pS345	0	-0.00759862	1
Chk2	-0.167842	-0.129413	0.145234
Chk2_pT68	-0.0824123	-0.0539137	1
Claudin-7	-0.35365	-0.529651	3.80571e-14
Collagen_VI	-0.00862586	-0.0464344	1
Cyclin_B1	-0.199664	-0.281112	0.000483891
Cyclin_D1	0.0179151	0.0279515	1
Cyclin_E1	-0.00228013	-0.0215814	1
Cyclin_E2	-0.0921887	-0.052685	1
DIRAS3	-0.0435188	-0.0437731	1
DJ-1	-0.0132113	-0.028616	1
DUSP4	-0.114182	-0.153404	1
Dvl3	-0.0863076	-0.0716925	1
E-Cadherin	-0.131296	-0.199289	1
EGFR	-0.175671	-0.187463	0.0153471
EGFR_pY1068	-0.113653	-0.172993	1
EGFR_pY1173	-0.19379	-0.108581	2.51286e-07
EPPK1	-0.00532003	-0.00976612	1
ER-alpha	0.172747	0.143289	0.0636134
ER-alpha_pS118	-0.00675642	-0.0309681	1
ERCC1	0.0251088	0.0353643	1
ERCC5	-0.0197819	-0.0154334	1
ERK2	0.0947968	0.115278	0.948489
ETS-1	0.143838	0.0806383	0.0151327
FASN	-0.300329	-0.390116	8.46785e-10
FOXO3a	-0.0235653	-0.0159991	1
FOXO3a_pS318_S321	0	0.0236365	1
Fibronectin	-0.192135	-0.309668	6.04887e-05
FoxM1	-0.0824914	-0.0794163	1
G6PD	0	0.00124789	1
GAB2	0.243092	0.280106	1.47168e-09
GAPDH	-0.15649	-0.276403	0.61737
GATA3	0.0834539	0.0561264	1
GSK3-alpha-beta	-0.0734941	-0.0354827	1
GSK3-alpha-beta_pS21_S9	0.0148832	0.05423	1
GSK3_pS9	0	0.00750284	1
HER2	0.0507035	0.0827461	1
HER2_pY1248	-0.0464754	-0.07263	1
HER3	-0.0225061	-0.0393774	1
HER3_pY1289	-0.0436822	-0.0324435	1
HSP70	0.129745	0.197488	1
Heregulin	-0.120219	-0.102072	0.00242065
IGF1R_pY1135_Y1136	-0.0306071	-0.0375162	1
IGFBP2	-0.303338	-0.662723	5.0299e-10
INPP4B	0.0787837	0.110049	1
IRF-1	0.219097	0.128077	2.32104e-08
IRS1	0	0.0169224	1
JAB1	-0.0706768	-0.058203	1
JNK2	0.142882	0.0880976	0.171945
JNK_pT183_pY185	0	-0.00471948	1
Jak2	0.443182	0.255888	4.65633e-36
Ku80	0.0220458	0.044765	1
LKB1	0	0.0218872	1
Lck	0.509179	0.382639	8.12618e-36
MAPK_pT202_Y204	0.039217	0.0442883	1
MEK1	0.0166488	0.00791131	1
MEK1_pS217_S221	-0.0594941	-0.0683663	1
MIG-6	-0.0154945	-0.0408078	1
MSH2	-0.0488678	-0.0501534	1
MSH6	-0.124281	-0.135868	0.129656
MYH11	0.0978254	0.265867	1
Mre11	0	-0.00376537	1
Myosin-IIa_pS1943	0.00078519	0.0376876	1
N-Cadherin	0.0528334	0.0485716	1
N-Ras	-0.0432878	-0.0140467	1
NDRG1_pT346	-0.222254	-0.480571	0.000714622
NF-kB-p65_pS536	0.156561	0.199071	0.0143443
NF2	0	0.0108518	1
Notch1	0.0728717	0.0518682	1
P-Cadherin	-0.11183	-0.0729089	1
PAI-1	-0.2074	-0.429841	6.2875e-06
PARP_cleaved	0	0.0109287	1
PCNA	-0.182501	-0.123818	0.000607243
PDCD4	0.0385293	0.092069	1
PDK1	-0.00923582	-0.0422306	1
PDK1_pS241	0.134225	0.0825346	0.0709834
PEA15	0.152264	0.105233	0.270163
PEA15_pS116	0.108926	0.100372	1
PI3K-p110-alpha	0	-0.00760145	1
PI3K-p85	0.32932	0.198545	8.40809e-16
PKC-alpha	0.175519	0.13612	0.00180955
PKC-alpha_pS657	0.202272	0.171589	0.00017203
PKC-delta_pS664	0.236659	0.103427	5.71963e-07
PKC-pan_BetaII_pS660	0.224599	0.250265	3.74494e-10
PR	0.000295266	0.00337532	1
PRAS40_pT246	-0.0291129	-0.0414091	1
PRDX1	-0.0697048	-0.0660541	1
PREX1	0.47129	0.264102	3.59567e-32
PTEN	0.120904	0.0965955	1
Paxillin	0.0440812	0.0547372	1
RBM15	-0.00163598	-0.0201348	1
Rab11	-0.0738981	-0.0568478	1
Rab25	-0.211825	-0.190281	0.000294764
Rad50	0.0260579	0.0438642	1
Rad51	0	0.0119555	1
Raptor	0.045138	0.0459436	1
Rb	0	-0.018848	1
Rb_pS807_S811	-0.183081	-0.21412	0.0332096
Rictor	0.140161	0.209953	0.524231
Rictor_pT1135	-0.030845	-0.050445	1
S6	-0.00778869	-0.00262738	1
S6_pS235_S236	0	0.00373138	1
S6_pS240_S244	0	0.00139106	1
SCD	-0.127581	-0.062437	0.098099
SETD2	0	-0.0160917	1
SF2	-0.175228	-0.0652081	0.00829896
SHP-2_pY542	-0.0162919	-0.0346227	1
STAT3_pY705	0.0472069	0.0607218	1
STAT5-alpha	0.520805	0.707196	0
Shc_pY317	-0.150899	-0.0874283	0.0205953
Smac	-0.164496	-0.17481	0.0321077
Smad1	-0.0546274	-0.0389943	1
Smad3	-0.0127882	-0.022114	1
Smad4	-0.133876	-0.0692297	0.000161313
Snail	0.000862427	0.00689359	1
Src	-0.104822	-0.0662792	1
Src_pY416	0	-0.00700576	1
Src_pY527	-0.0101514	-0.0420264	1
Stathmin	-0.125629	-0.0821932	0.000339299
Syk	0.47627	0.500708	8.68955e-29
TAZ	-0.044072	-0.0354899	1
TFRC	-0.14814	-0.261076	1
TIGAR	0	0.00227422	1
TSC1	0.055697	0.0824443	1
TTF1	-0.0592563	-0.170825	1
Transglutaminase	0.188307	0.197608	0.00275726
Tuberin	0.225344	0.221823	4.36897e-15
Tuberin_pT1462	0.0539406	0.0517521	1
VEGFR2	-0.0666417	-0.0830984	1
XBP1	0.171089	0.129747	0.00072782
XRCC1	-0.196455	-0.105589	3.08819e-05
YAP	-0.199782	-0.168945	1.70266e-07
YAP_pS127	-0.0907818	-0.117537	1
YB-1	0.0716324	0.0980512	1
YB-1_pS102	-0.123917	-0.10297	0.0191455
beta-Catenin	-0.0329039	-0.0701829	1
c-Abl	-0.202971	-0.118525	3.65176e-10
c-Jun_pS73	0	-0.0139222	1
c-Kit	-0.0549818	-0.0980782	1
c-Met	0.00662832	0.0249882	1
c-Met_pY1235	-0.0678374	-0.041319	0.116315
c-Myc	-0.0453833	-0.0328417	1
cIAP	-0.00906957	-0.0195661	1
eEF2	0	0.0316513	1
eEF2K	0.196915	0.191082	3.46858e-05
eIF4E	-0.078022	-0.0602236	1
eIF4G	0.0277435	0.0696909	1
mTOR	0.099087	0.0763459	0.394274
mTOR_pS2448	0.0802666	0.069844	1
p16_INK4a	-0.0125122	-0.0730812	1
p21	-0.131363	-0.148152	1
p27	0.242917	0.133623	1.68572e-08
p27_pT157	0	-0.000272849	1
p27_pT198	0.377443	0.17985	1.53794e-22
p38_MAPK	0.118279	0.0578504	1
p38_pT180_Y182	-0.00712104	-0.0378671	1
p53	0	0.00547873	1
p62-LCK-ligand	0.103607	0.178111	1
p70S6K	0	-0.000538714	1
p70S6K_pT389	0.0513641	0.0462598	1
p90RSK	0.0611642	0.0570625	1
p90RSK_pT359_S363	0	0.00703132	1

## Sheet: rnaseq_Immune
Gene	funcSFA Coefficient	OLS Coefficient	p
ENSG00000011347.8	-0.0413218	-0.104827	0.0162655
ENSG00000161798.6	0	0.00344925	1
ENSG00000115525.15	0.115665	0.0801646	4.30247e-05
ENSG00000137491.13	0.68548	0.45315	0
ENSG00000133657.13	0	-0.000336639	1
ENSG00000221867.7	-0.0202145	-0.0578455	1
ENSG00000156298.11	0	0.00554312	1
ENSG00000114948.11	0	0.0570702	0.480779
ENSG00000099204.17	0	0.00025918	1
ENSG00000148175.11	0.177696	0.137604	4.29474e-07
ENSG00000157514.15	0.359018	0.27346	6.40612e-27
ENSG00000177697.16	0	0.00543935	1
ENSG00000140443.12	-0.0509417	-0.109769	0.00135514
ENSG00000118816.8	0.0501973	0.0441166	1
ENSG00000138119.15	0	0.00889569	1
ENSG00000215021.7	0	-0.00238288	1
ENSG00000196743.7	0.298767	0.223957	4.32009e-34
ENSG00000166741.6	0.213368	0.203669	1.30368e-14
ENSG00000067057.15	0	-0.0283196	1
ENSG00000158467.15	0	-0.0370905	1
ENSG00000023909.8	0	-0.0110005	1
ENSG00000122862.4	0.650161	0.468237	0
ENSG00000141526.13	0.0182433	0.0354699	1
ENSG00000120875.7	0.0096443	0.0860053	0.35629
ENSG00000110880.9	0.0709241	0.0854242	3.2455e-06
ENSG00000104408.8	0	-0.0204791	1
ENSG00000007038.9	0	0.0413872	1
ENSG00000085662.12	0.186049	0.17261	1.2291e-12
ENSG00000143387.11	0.425878	0.37544	0
ENSG00000111275.11	0.227208	0.178051	1.10092e-12
ENSG00000167900.10	0	-0.00197603	1
ENSG00000044115.19	0	-0.0131594	1
ENSG00000211965.3	0.753593	0.570318	0
ENSG00000145741.14	0.0189781	0.035856	1
ENSG00000078369.16	0.00563822	0.0184183	1
ENSG00000060656.18	0	0.00410031	1
ENSG00000049540.15	0.220489	0.22733	6.66032e-19
ENSG00000114374.11	-0.0149502	-0.0243303	1
ENSG00000039560.12	0	0.0103087	1
ENSG00000138448.10	0.10444	0.0726902	0.20181
ENSG00000135624.14	0	-0.0171757	1
ENSG00000101335.8	0.308023	0.212961	8.56307e-21
ENSG00000163898.8	0	0.0501307	1
ENSG00000058063.14	0	0.00466463	1
ENSG00000049323.14	0	0.0257206	1
ENSG00000158769.16	0	-0.0697137	0.151504
ENSG00000156471.11	0	0.00196094	1
ENSG00000101311.14	0	-0.0432418	1
ENSG00000065833.8	0	0.022159	1
ENSG00000100994.10	0	0.00365635	1
ENSG00000232629.7	0.514626	0.369282	0
ENSG00000013364.17	0.188305	0.136655	9.51786e-13
ENSG00000125844.14	0	-0.0101381	1
ENSG00000164626.8	0.0741242	0.0508913	1
ENSG00000143384.11	0.13454	0.101587	0.000181027
ENSG00000242574.7	0.779034	0.511936	0
ENSG00000179593.14	0.0153242	0.0328677	1
ENSG00000114638.6	-0.0163656	-0.000710578	1
ENSG00000141736.12	0	-0.0352208	1
ENSG00000146731.9	-0.03846	-0.0985116	0.000233463
ENSG00000157613.9	0.0189076	0.0717052	1
ENSG00000165140.8	0.290024	0.232931	1.43665e-32
ENSG00000103888.14	0	0.0668724	1
ENSG00000127324.7	0	0.0199582	1
ENSG00000084733.9	0	-0.00990994	1
ENSG00000149573.7	0	-0.0175057	1
ENSG00000225548.4	-0.0293165	-0.0359625	1
ENSG00000176014.11	0.0489725	0.065412	0.0960732
ENSG00000206073.9	0	-0.00448481	1
ENSG00000147381.10	0	0.0239919	1
ENSG00000174231.15	0	-0.0437718	1
ENSG00000148773.11	-0.0101751	-0.0605006	1
ENSG00000115306.14	0	-0.0419243	1
ENSG00000182871.13	0.0783905	0.0712324	1
ENSG00000150687.10	0.119537	0.0885824	0.189018
ENSG00000067560.9	0.206842	0.137942	2.22888e-25
ENSG00000101160.12	0.470563	0.327801	0
ENSG00000177469.12	0.155234	0.117694	3.92895e-06
ENSG00000085552.15	-0.0411672	-0.0570878	1
ENSG00000211637.2	0.767546	0.633672	0
ENSG00000170476.14	0.821218	0.637223	0
ENSG00000112245.8	0	-0.0719898	1
ENSG00000163872.14	0	-0.0397601	1
ENSG00000140575.11	0	0.0129436	1
ENSG00000140264.18	0	0.0516674	1
ENSG00000211955.2	0.734023	0.583725	0
ENSG00000105426.13	0	-0.0110156	1
ENSG00000165152.7	0	0.0135719	1
ENSG00000180818.4	0	-0.000553561	1
ENSG00000129654.7	0	0.041879	1
ENSG00000165280.14	0	0.0292612	1
ENSG00000241755.1	0.779778	0.650599	0
ENSG00000103460.15	0	-0.0297935	1
ENSG00000067048.15	-0.00104714	-0.0255054	1
ENSG00000233864.6	0	-0.0106132	1
ENSG00000136518.15	0	-0.00524794	1
ENSG00000176945.15	0	-0.0045441	1
ENSG00000152234.14	0	0.0451635	1
ENSG00000104783.10	0.229323	0.140201	1.99158e-10
ENSG00000105707.12	0	-0.0402277	1
ENSG00000072041.15	0	-0.039937	1
ENSG00000163739.4	0	-0.00527494	1
ENSG00000140564.9	-0.0162264	-0.0946797	1
ENSG00000143850.11	0.0110458	0.0389842	1
ENSG00000170348.7	0	-0.00243521	1
ENSG00000234741.6	0	-0.0504539	1
ENSG00000100201.17	0.0190558	0.0397317	1
ENSG00000060982.13	0.157538	0.082179	1
ENSG00000176788.8	0	-0.0194542	1
ENSG00000131781.11	0	0.0260671	1
ENSG00000142676.11	0	-0.00110451	1
ENSG00000149257.12	0	0.0127348	1
ENSG00000025708.11	0.386582	0.333888	5.55447e-41
ENSG00000019169.10	0.440735	0.274798	4.40847e-33
ENSG00000130208.8	0.61738	0.47681	0
ENSG00000251381.5	-0.065607	-0.0629201	0.295337
ENSG00000112936.17	0.323338	0.333263	8.80716e-42
ENSG00000124225.14	0.0597252	0.0501774	1
ENSG00000104687.11	0	-0.0171408	1
ENSG00000111371.14	-0.00116162	-0.04601	1
ENSG00000108551.4	0	-0.023416	1
ENSG00000170315.12	0.13449	0.117387	4.68669e-05
ENSG00000114416.16	0	-0.0276551	1
ENSG00000140937.12	0.333415	0.227785	2.51158e-34
ENSG00000204469.11	0	-0.0529161	1
ENSG00000131002.10	-0.00242677	-0.0102803	1
ENSG00000163466.14	0.11299	0.0933193	3.46558e-09
ENSG00000115091.10	0.0142521	0.0548429	0.102186
ENSG00000091129.18	0	0.0364044	1
ENSG00000125148.6	0.229073	0.208473	1.0786e-11
ENSG00000137076.17	0.191474	0.137731	1.32247e-11
ENSG00000114346.12	-0.00968288	-0.0569343	1
ENSG00000106483.10	0.392247	0.355376	8.37976e-43
ENSG00000168528.10	0	-0.0696572	1
ENSG00000135069.12	0	0.0173164	1
ENSG00000265933.4	0	-0.018965	1
ENSG00000203747.8	0.705824	0.490305	0
ENSG00000069275.12	0	-0.0295992	1
ENSG00000007062.10	0	0.0647726	1
ENSG00000100304.12	-0.0308132	-0.0655294	0.0183793
ENSG00000168615.10	0	-0.0599683	1
ENSG00000128595.15	0.0146534	0.0416482	1
ENSG00000144824.18	0	0.0117806	1
ENSG00000125835.16	0	-0.00211429	1
ENSG00000115484.13	0	-0.0161297	1
ENSG00000111206.11	0	-0.0398286	1
ENSG00000166165.11	-0.00399634	-0.102174	1
ENSG00000182175.12	0	0.00359705	1
ENSG00000248527.1	0	0.0452642	1
ENSG00000160789.18	0	0.00350856	1
ENSG00000142102.14	0	0.0122067	1
ENSG00000110651.10	0.199785	0.180745	1.26827e-20
ENSG00000119335.15	0	-0.00266979	1
ENSG00000277443.1	0.0518004	0.114931	1.16183e-06
ENSG00000103485.16	0.000449221	0.0502398	1
ENSG00000251562.6	0	-0.037489	1
ENSG00000128016.5	0.111238	0.112643	0.0615453
ENSG00000131668.12	-0.0370219	-0.0591483	1
ENSG00000130255.11	0	0.0583746	0.718171
ENSG00000187193.8	0	0.0164792	1
ENSG00000172809.11	0	0.0317022	1
ENSG00000019549.7	0	-0.00130048	1
ENSG00000092820.16	0	0.0149597	1
ENSG00000018236.13	0	-0.0322488	1
ENSG00000108654.10	0.112981	0.101272	0.000134631
ENSG00000158195.9	0	-0.0264695	1
ENSG00000136689.17	0.102136	0.102267	0.000213595
ENSG00000124766.5	-0.044014	-0.118941	0.000291888
ENSG00000087128.8	0	-0.0445064	1
ENSG00000052344.14	0	-0.0639689	1
ENSG00000014216.14	0	-0.0183924	1
ENSG00000250722.4	0.23461	0.199495	2.02481e-10
ENSG00000149591.15	0.327984	0.294983	1.05093e-40
ENSG00000135862.5	0	-0.0780397	0.0389569
ENSG00000213853.8	0.105143	0.111732	0.0116418
ENSG00000176619.9	0	-0.0583435	0.214832
ENSG00000162909.16	0	-0.0116766	1
ENSG00000134184.11	0	0.0192535	1
ENSG00000160710.14	0.0914109	0.0897796	0.0175215
ENSG00000113739.9	-0.0338507	-0.0812179	0.023371
ENSG00000164032.10	0	0.00956088	1
ENSG00000088325.14	-0.018882	-0.0608418	1
ENSG00000099725.13	-0.012868	-0.0173898	1
ENSG00000108582.10	0	-0.0298957	1
ENSG00000105281.11	0	-0.0127019	1
ENSG00000275410.3	0	-0.0119371	1
ENSG00000114554.10	0	0.0265865	1
ENSG00000155066.14	0	-0.0253931	1
ENSG00000106546.11	0.1033	0.0826451	1
ENSG00000163331.9	0	0.00254404	1
ENSG00000176597.10	0	-0.0275788	1
ENSG00000136153.18	0.00281958	0.020523	1
ENSG00000104140.6	-0.0584928	-0.0523447	1
ENSG00000149418.9	0	0.00250215	1
ENSG00000177565.14	0	0.0098495	1
ENSG00000229807.8	0.0352759	0.0432051	1
ENSG00000075275.15	-0.0935761	-0.153308	7.47786e-11
ENSG00000136830.10	0	0.0037319	1
ENSG00000188910.7	0	0.00778025	1
ENSG00000111907.19	0	-0.030712	1
ENSG00000157404.14	0	0.041712	1
ENSG00000197565.14	0	-0.0395741	1
ENSG00000047936.9	0.0370039	0.0164641	1
ENSG00000125398.5	0	0.00438654	1
ENSG00000072210.17	0	-0.0603491	1
ENSG00000139289.12	0	-0.014006	1
ENSG00000196262.12	0	0.0153188	1
ENSG00000092199.16	0	0.0119777	1
ENSG00000166147.12	0.304057	0.276362	0
ENSG00000150991.13	0.0432467	0.0747966	0.00181447
ENSG00000111341.8	0.415514	0.370537	0
ENSG00000136002.15	-0.0288362	-0.0505417	1
ENSG00000090104.10	0.680162	0.502164	0
ENSG00000163032.10	0	0.00290941	1
ENSG00000165168.7	0.766707	0.539437	0
ENSG00000104904.11	0.163768	0.168045	1.33672e-22
ENSG00000133477.15	-0.00719693	-0.0284113	1
ENSG00000211941.3	0.789392	0.675899	0
ENSG00000140105.16	0.391845	0.368192	4.81495e-39
ENSG00000163468.13	0	-0.0562004	0.1167
ENSG00000213639.8	0	-0.0447064	1
ENSG00000105976.13	0.0728921	0.0683688	1
ENSG00000146555.17	0	0.025674	1
ENSG00000006747.13	0	-0.0170834	1
ENSG00000072110.12	0	0.0413819	1
ENSG00000143878.9	0	-0.00712233	1
ENSG00000166670.8	0	-0.0256047	1
ENSG00000079308.15	0.17708	0.147793	2.27742e-11
ENSG00000058262.8	0	0.0527338	1
ENSG00000162244.9	0.0142216	0.0523462	1
ENSG00000228253.1	0	0.0217941	1
ENSG00000067167.6	0.142041	0.0875511	0.0132957
ENSG00000163453.10	0.435348	0.320104	1.04327e-41
ENSG00000211956.2	0.760095	0.633029	0
ENSG00000066405.11	0.0916509	0.10033	0.000894676
ENSG00000064042.16	0	-0.00299491	1
ENSG00000065361.13	0	-0.0516744	1
ENSG00000275395.3	0.195972	0.1686	3.5635e-07
ENSG00000182481.7	0	-0.0255624	1
ENSG00000159335.14	0	-0.0103755	1
ENSG00000140526.15	0.0127789	0.0334937	1
ENSG00000204257.13	0.642762	0.478071	0
ENSG00000134419.14	0.0437707	0.0967685	3.68176e-07
ENSG00000085063.13	0.202688	0.150185	9.53162e-09
ENSG00000029153.13	0.00261796	0.0496628	1
ENSG00000075426.10	0	-0.00866469	1
ENSG00000006118.13	0	-0.00186968	1
ENSG00000168453.13	0	0.0303741	1
ENSG00000010292.11	-0.0220119	-0.0573769	0.464609
ENSG00000163975.10	0	0.0392672	1
ENSG00000143870.11	-0.015535	-0.0627153	1
ENSG00000205336.10	0	-0.0482282	1
ENSG00000131981.14	0.145762	0.143069	3.41905e-09
ENSG00000129116.16	0.137189	0.12833	2.00539e-09
ENSG00000237541.3	0.51906	0.412735	1.60449e-42
ENSG00000157601.12	0.348607	0.282736	3.40458e-20
ENSG00000186468.11	0.0813934	0.0852525	0.000135183
ENSG00000086598.9	0	-0.0191651	1
ENSG00000132746.13	0	-0.00316565	1
ENSG00000167244.16	0	0.0187085	1
ENSG00000280411.1	0.745858	0.648228	0
ENSG00000118898.14	0	-0.0638436	1
ENSG00000110799.12	0.201568	0.166403	7.70572e-10
ENSG00000170027.6	0	-0.0349972	1
ENSG00000100644.15	0.00908981	0.0277946	1
ENSG00000211950.2	0.730284	0.636972	0
ENSG00000029993.13	-0.15939	-0.20638	1.20676e-11
ENSG00000198242.12	0	0.0392167	1
ENSG00000168394.10	0.517999	0.435663	0
ENSG00000105974.10	0.104909	0.06495	1
ENSG00000211962.2	0.778926	0.667232	0
ENSG00000168003.15	0	-0.0403703	1
ENSG00000141367.10	0	-0.00751469	1
ENSG00000131771.12	0	-0.0740485	1
ENSG00000167183.2	0	0.0485483	1
ENSG00000090530.8	0	-0.041207	1
ENSG00000166508.16	0	-0.0121249	1
ENSG00000130513.6	0	-0.0345733	1
ENSG00000173376.12	0.0671833	0.0556613	1
ENSG00000221983.6	0.0181496	0.0945734	2.19168e-07
ENSG00000177575.11	0.646814	0.441894	0
ENSG00000143321.17	0	-0.0115323	1
ENSG00000143365.15	0	0.0132386	1
ENSG00000146166.15	0	-0.0444044	1
ENSG00000104738.15	-0.0458113	-0.0768484	0.0334525
ENSG00000152583.11	0.320852	0.243586	3.57036e-21
ENSG00000130726.10	0	-0.0383603	1
ENSG00000107796.11	0.331054	0.304558	0
ENSG00000211669.2	0.732938	0.647513	0
ENSG00000110958.14	0	0.0223214	1
ENSG00000169604.18	0.139131	0.176151	7.40177e-19
ENSG00000138271.5	0	0.0446247	1
ENSG00000171560.13	-0.00566485	-0.0947849	0.677326
ENSG00000091136.12	0	0.0156203	1
ENSG00000188906.12	0.14247	0.119771	5.4778e-08
ENSG00000135486.16	0	-0.0173944	1
ENSG00000143126.7	-0.0210178	-0.0936197	3.74824e-05
ENSG00000166923.9	0.255985	0.297712	4.98408e-37
ENSG00000133048.11	0.42909	0.409283	5.13169e-31
ENSG00000197102.9	0	-0.0756824	0.250209
ENSG00000179178.9	0	0.0161297	1
ENSG00000137642.11	-0.00699226	-0.073177	1
ENSG00000135919.11	0	0.0670607	1
ENSG00000121579.11	0	0.0247355	1
ENSG00000186529.13	0	0.0107769	1
ENSG00000135318.10	0.14032	0.0803518	0.451311
ENSG00000124664.9	0	-0.00104248	1
ENSG00000075785.11	0.013885	0.0647942	0.00862994
ENSG00000159403.14	0.449892	0.403047	0
ENSG00000143761.12	7.7386e-05	0.0234474	1
ENSG00000173821.18	0.258435	0.212409	4.73597e-14
ENSG00000009307.14	0.00583472	0.021489	1
ENSG00000185215.7	0.26984	0.245962	2.01333e-15
ENSG00000143061.16	0	-0.0660752	1
ENSG00000125285.5	-0.0294358	-0.0364445	1
ENSG00000132386.9	0.221085	0.240711	4.14875e-17
ENSG00000152952.10	0	-0.0155276	1
ENSG00000173467.7	0	0.0130148	1
ENSG00000135052.15	0	0.011287	1
ENSG00000114251.12	0	0.0348263	1
ENSG00000171658.7	0	-0.00652545	1
ENSG00000160862.11	0.123598	0.128801	0.0208447
ENSG00000003436.13	0.0739046	0.058637	1
ENSG00000066468.19	0	0.014311	1
ENSG00000121039.8	-0.0218938	-0.0715187	1
ENSG00000163131.9	0.679536	0.57054	0
ENSG00000211947.2	0.813569	0.721182	0
ENSG00000168036.15	0.0259631	0.0271594	1
ENSG00000113657.11	0.0975944	0.140575	0.000223129
ENSG00000165119.17	0	0.0228851	1
ENSG00000142871.14	0.307159	0.209167	5.94389e-18
ENSG00000130707.16	0.0660683	0.119018	0.0774333
ENSG00000112972.13	-0.0532704	-0.0809923	0.0805683
ENSG00000164687.9	0	-0.0179469	1
ENSG00000134107.4	0	-9.99519e-05	1
ENSG00000197930.11	-0.0510529	-0.10652	0.00109825
ENSG00000137745.10	0	0.0220631	1
ENSG00000074416.12	0.13054	0.120024	0.000406907
ENSG00000109861.14	0.262167	0.229251	1.5146e-15
ENSG00000003989.15	0	-0.0100711	1
ENSG00000139318.7	0	-0.0646363	1
ENSG00000091986.14	0.37298	0.356071	0
ENSG00000268104.2	0	0.0381521	1
ENSG00000270550.1	0.776685	0.687829	0
ENSG00000144810.14	0.275294	0.238571	1.4661e-32
ENSG00000129451.10	0	0.0230396	1
ENSG00000155660.9	-0.0295712	-0.101438	0.00861297
ENSG00000132002.6	0	0.0235167	1
ENSG00000102287.15	0	0.0553586	1
ENSG00000175061.16	0	-0.0393398	1
ENSG00000196562.13	0.082248	0.122635	1.11571e-05
ENSG00000102007.9	0	-0.0103682	1
ENSG00000136167.12	0.658818	0.522969	0
ENSG00000182379.9	0	-0.038605	1
ENSG00000108518.7	0.0803396	0.0962828	1.97192e-07
ENSG00000090776.5	0	0.0216141	1
ENSG00000109472.12	0	-0.0756217	1
ENSG00000116016.12	0	0.0107377	1
ENSG00000170017.11	0	-0.049893	1
ENSG00000163902.10	0	0.0550815	1
ENSG00000171867.15	0.067765	0.0602412	1
ENSG00000188229.5	0	-0.0246695	1
ENSG00000260314.2	0.510727	0.335118	0
ENSG00000185650.9	0.00937902	0.0302238	1
ENSG00000117525.12	-0.037826	-0.106957	0.449894
ENSG00000211648.2	0.80452	0.735639	0
ENSG00000125740.12	0.0860091	0.0907851	1
ENSG00000101444.11	0	-0.00983677	1
ENSG00000177156.9	0	0.0183956	1
ENSG00000244437.1	0.825316	0.758131	0
ENSG00000082641.14	0	0.00395257	1
ENSG00000116044.14	0	0.016921	1
ENSG00000169474.4	0	-0.00135036	1
ENSG00000130294.13	0	-0.0112699	1
ENSG00000211673.2	0.820627	0.742334	0
ENSG00000164308.15	0.263719	0.183229	2.59041e-07
ENSG00000196531.9	0	0.011711	1
ENSG00000162366.6	0.0775205	0.113875	0.00981879
ENSG00000164171.9	0	-0.0151749	1
ENSG00000110092.3	0	0.00976913	1
ENSG00000166535.18	0	0.0180962	1
ENSG00000167757.12	0	-0.0352142	1
ENSG00000118680.11	0.0265758	0.0646387	0.909475
ENSG00000211934.3	0.715856	0.61756	0
ENSG00000161011.18	0.147901	0.138402	2.90521e-09
ENSG00000160180.15	0	-0.00869773	1
ENSG00000162551.12	0.0654227	0.0571084	1
ENSG00000163682.14	0.0476762	0.0687899	0.24049
ENSG00000164120.12	0.0145673	0.0336862	1
ENSG00000102265.10	0.313961	0.289261	1.33908e-25
ENSG00000105357.14	0	-0.00768028	1
ENSG00000104368.16	0	-0.00802103	1
ENSG00000100985.7	0.362968	0.379404	3.57387e-37
ENSG00000198561.11	0	-0.0474798	1
ENSG00000119681.10	0.258406	0.210539	1.93268e-22
ENSG00000122566.19	0	-0.00935423	1
ENSG00000189280.3	0	0.00758702	1
ENSG00000132475.7	0	0.0185487	1
ENSG00000163430.8	0.191853	0.190789	3.76742e-17
ENSG00000030582.15	0.214578	0.202424	3.4897e-19
ENSG00000118523.5	0.312529	0.284835	1.13723e-31
ENSG00000135404.10	0.172653	0.163567	2.00453e-16
ENSG00000105223.17	0.105733	0.113306	0.143523
ENSG00000171858.16	0	0.0189114	1
ENSG00000167165.17	0	0.0173519	1
ENSG00000139926.14	0	0.0314995	1
ENSG00000108352.10	-0.0439537	-0.0416883	1
ENSG00000140519.11	0	0.00865254	1
ENSG00000172270.17	0	-0.0215915	1
ENSG00000115677.15	0	-0.0398103	1
ENSG00000160255.15	0.74245	0.582541	0
ENSG00000163565.17	0.169973	0.152405	7.91256e-09
ENSG00000070526.13	-0.120184	-0.116844	0.00582538
ENSG00000196576.13	0	-0.00155696	1
ENSG00000174748.17	0.0883827	0.0986319	1.62433e-08
ENSG00000133063.14	0.528856	0.53187	0
ENSG00000138449.9	0.279054	0.206813	3.46401e-11
ENSG00000089009.14	0	-0.0152018	1
ENSG00000137673.7	0.285537	0.236319	2.82457e-11
ENSG00000132341.10	0	0.00510424	1
ENSG00000198911.10	0	-0.0379022	1
ENSG00000169100.11	0	0.0398843	1
ENSG00000184012.10	0	0.0457617	1
ENSG00000156482.9	0	0.00161653	1
ENSG00000105640.11	0.0205165	0.11164	3.78437e-07
ENSG00000134308.12	0	-0.00811192	1
ENSG00000115221.9	0.0143694	0.0154653	1
ENSG00000257017.7	0	-0.0139897	1
ENSG00000117632.19	0	-0.00341697	1
ENSG00000069011.14	0	-0.0106958	1
ENSG00000159228.11	0	-0.0172864	1
ENSG00000136997.13	0	-0.0132205	1
ENSG00000112715.19	-0.0991144	-0.201938	3.31202e-10
ENSG00000150093.17	0.0528311	0.028711	1
ENSG00000116260.15	0	-0.0485816	1
ENSG00000212907.2	0	-0.000497753	1
ENSG00000163207.6	0	0.0146969	1
ENSG00000211445.10	0.24387	0.191997	1.80308e-10
ENSG00000092841.17	0.176108	0.157427	1.29734e-14
ENSG00000145425.8	0.0971048	0.103159	1.23872e-06
ENSG00000174437.15	-0.0156078	-0.0707501	0.210009
ENSG00000170889.12	0.0687306	0.121325	1.96774e-11
ENSG00000211943.2	0.811504	0.724865	0
ENSG00000089597.15	0	-0.0308172	1
ENSG00000070731.8	0	0.0319557	1
ENSG00000064655.17	0	-0.00225807	1
ENSG00000035862.11	0.370894	0.311749	0
ENSG00000134247.9	0	-0.0472343	1
ENSG00000107159.11	0	-0.0539004	1
ENSG00000083857.12	-0.0062672	-0.117562	0.068924
ENSG00000177600.7	0.0521873	0.101363	1.41842e-06
ENSG00000197756.8	0	-0.0168851	1
ENSG00000174469.16	0	0.0360282	1
ENSG00000189060.5	-0.0554183	-0.0993759	0.155554
ENSG00000159166.12	0	-0.0734477	1
ENSG00000130066.15	0.0620145	0.146017	0.000585888
ENSG00000196419.11	0	-0.0229799	1
ENSG00000134294.12	0	-0.0519945	1
ENSG00000121064.11	0.154259	0.159513	5.64813e-07
ENSG00000108107.11	0.0459959	0.109046	0.000115439
ENSG00000124145.6	0.0300287	0.0258737	1
ENSG00000120129.5	0.274242	0.204365	8.43142e-10
ENSG00000173812.9	0	0.0320654	1
ENSG00000133636.9	-0.0383678	-0.0408537	1
ENSG00000247627.2	0	-0.0139274	1
ENSG00000166415.13	-0.0701764	-0.0743305	1
ENSG00000105855.8	0	0.0252576	1
ENSG00000167656.4	0	0.0126972	1
ENSG00000169594.11	0	-0.00874236	1
ENSG00000142973.11	0.0355159	0.0939755	0.0521425
ENSG00000144713.11	0.0567349	0.0905968	5.22513e-05
ENSG00000022556.14	0.0791968	0.0654116	1
ENSG00000134531.8	0.118037	0.0976451	0.0575325
ENSG00000019186.8	0	-0.034298	1
ENSG00000142089.14	0.261643	0.218193	8.85197e-14
ENSG00000167553.13	0	-0.0151789	1
ENSG00000141756.17	0	0.00212159	1
ENSG00000100097.10	0.284921	0.248161	1.39594e-22
ENSG00000136810.11	0	0.0230766	1
ENSG00000173372.15	0.792093	0.662076	0
ENSG00000104341.15	-0.131026	-0.187828	2.19023e-10
ENSG00000118705.15	0	-0.0311413	1
ENSG00000004478.7	-0.0134119	-0.0536571	1
ENSG00000149131.14	0.59533	0.499345	0
ENSG00000005022.5	0	0.0568516	1
ENSG00000162738.5	0	-0.024671	1
ENSG00000181163.12	0.000787257	0.0262987	1
ENSG00000131711.13	0	0.0186701	1
ENSG00000169714.15	0	0.076757	1.37168e-05
ENSG00000006210.6	0.227869	0.18962	2.73589e-08
ENSG00000039068.17	0	-0.0859252	1
ENSG00000163216.6	0	-0.000114925	1
ENSG00000211640.3	0.802507	0.765793	0
ENSG00000147065.15	0.149084	0.152666	1.84244e-06
ENSG00000148926.8	0	-0.0325186	1
ENSG00000143933.15	0.0772004	0.0582052	1
ENSG00000168209.4	0	-0.00876124	1
ENSG00000133392.15	0.148801	0.19359	2.88225e-07
ENSG00000065978.16	0	0.00873937	1
ENSG00000144381.15	-0.0386939	-0.0688084	0.178572
ENSG00000073111.12	0	0.0112147	1
ENSG00000073756.10	-0.0770205	-0.18747	2.81118e-06
ENSG00000224373.3	0.802664	0.740933	0
ENSG00000275385.1	0.536371	0.468506	0
ENSG00000265190.5	0	0.0599482	0.00951989
ENSG00000074211.12	0	-0.0311916	1
ENSG00000161202.16	0	-0.0137605	1
ENSG00000168028.12	0.0245099	0.0847207	0.000305575
ENSG00000123416.14	0.0201903	0.0552438	1
ENSG00000204544.5	0	-0.0332253	1
ENSG00000060138.11	0	-0.0521327	1
ENSG00000198755.9	0	0.0279078	1
ENSG00000196352.12	0	-0.011007	1
ENSG00000143947.11	0	0.0307136	1
ENSG00000101210.9	0	-0.0177449	1
ENSG00000152558.13	0	0.0288172	1
ENSG00000130303.11	0.358725	0.284907	5.62359e-19
ENSG00000130508.9	0	-0.0234587	1
ENSG00000108953.15	0	-0.0418998	1
ENSG00000127022.13	0.084215	0.0781824	0.567946
ENSG00000211668.2	0.837192	0.794074	0
ENSG00000143375.13	0	-0.0761129	0.871511
ENSG00000100979.13	0.130343	0.137311	0.00506702
ENSG00000167978.15	0.00418761	0.0172633	1
ENSG00000134824.12	0	-0.0209402	1
ENSG00000134755.13	0	-0.0694582	1
ENSG00000006534.14	0.0842267	0.11308	4.0728e-09
ENSG00000197958.11	0	0.053608	1
ENSG00000241794.1	0	-0.0046637	1
ENSG00000131747.13	-0.0178446	-0.070968	1
ENSG00000188157.12	0	-0.0611626	1
ENSG00000159189.10	0.771391	0.66386	0
ENSG00000110492.14	0.0187969	0.0580227	1
ENSG00000187498.13	0.0705877	0.0601436	1
ENSG00000132821.10	0	0.0101521	1
ENSG00000150753.10	-0.038248	-0.0886609	0.00379657
ENSG00000163435.14	-0.0472512	-0.0673914	1
ENSG00000164587.10	0.13116	0.13058	1.07922e-12
ENSG00000147257.12	0	-0.0476721	1
ENSG00000141753.6	0.162677	0.14717	9.80528e-06
ENSG00000123384.12	0.141936	0.140788	1.2043e-10
ENSG00000008394.11	0	-0.0660546	1
ENSG00000132507.16	0	-0.0269576	1
ENSG00000197747.7	0.0121695	0.0329165	1
ENSG00000169116.10	0.0467764	0.104221	0.334702
ENSG00000130702.12	-0.0764477	-0.114816	0.0245647
ENSG00000147604.12	-0.00370837	-0.0755495	0.088366
ENSG00000114391.11	0	0.0764621	0.0148135
ENSG00000159399.8	-0.0074286	-0.0900258	0.517646
ENSG00000153292.14	0.0101222	0.0612845	1
ENSG00000149948.12	0	-0.0322723	1
ENSG00000187514.13	0	0.0560711	1
ENSG00000167004.11	0	-0.0742966	1
ENSG00000147676.12	-0.0119071	-0.0719857	1
ENSG00000101825.7	0.136539	0.220688	9.06809e-26
ENSG00000162511.7	0.772403	0.672102	0
ENSG00000111319.11	-0.0177452	-0.0788025	1
ENSG00000125691.11	0	0.00963907	1
ENSG00000166441.11	0.0449929	0.0867984	0.000402442
ENSG00000149212.9	0	-0.0809928	1
ENSG00000105825.10	0.0470553	0.0147193	1
ENSG00000253729.6	-0.0670678	-0.105048	0.00131336
ENSG00000071082.9	0	0.0256018	1
ENSG00000185686.16	0	-0.0192125	1
ENSG00000063177.11	0	0.0719832	0.0486777
ENSG00000129521.12	0	-0.028694	1
ENSG00000243955.4	0	0.010044	1
ENSG00000134363.10	0	-0.0170168	1
ENSG00000134871.16	0.0488016	0.0573338	1
ENSG00000112096.15	0.353234	0.36525	2.77934e-41
ENSG00000106366.8	0.0782974	0.109415	0.136181
ENSG00000171885.12	0.00915014	0.0328978	1
ENSG00000167460.13	0.138038	0.148758	1.60982e-12
ENSG00000136942.13	0.0223378	0.103426	3.53637e-06
ENSG00000077942.16	0.185326	0.203124	1.86258e-14
ENSG00000262406.2	0.229886	0.262905	1.21085e-19
ENSG00000008988.8	0	-0.014244	1
ENSG00000115053.14	-0.0274599	-0.0819313	0.00659262
ENSG00000130402.10	0	0.0273573	1
ENSG00000172757.11	0.0250406	0.0634584	0.165142
ENSG00000253755.1	0.803164	0.814728	0
ENSG00000187244.9	0	-0.0816796	1
ENSG00000147889.15	0.0395979	0.0796352	1
ENSG00000211959.2	0.767836	0.801418	0
ENSG00000137573.12	0.187669	0.26738	3.07014e-33
ENSG00000169710.6	-0.105586	-0.193182	6.75662e-08
ENSG00000073792.14	0	-0.0373857	1
ENSG00000092621.10	0	-0.00420383	1
ENSG00000177954.10	0.0322078	0.0713469	0.234876
ENSG00000142798.15	0.0172052	0.0368901	1
ENSG00000151012.12	-0.036409	-0.0885475	0.0316502
ENSG00000211459.2	0	-0.0173674	1
ENSG00000196344.10	0	0.0165917	1
ENSG00000189143.9	0	0.0126939	1
ENSG00000105835.10	0	0.0292851	1
ENSG00000103811.14	0.260515	0.282556	9.29292e-19
ENSG00000119655.7	0.200519	0.188696	2.03717e-11
ENSG00000148180.15	0.150575	0.171698	5.77557e-07
ENSG00000112306.7	0.0348825	0.0913688	0.00471422
ENSG00000103222.17	0	0.0190557	1
ENSG00000160932.9	0.172547	0.195751	5.76385e-07
ENSG00000099994.10	0.132551	0.122795	6.60321e-05
ENSG00000169429.9	0	-0.05135	1
ENSG00000156976.13	0	0.0439295	1
ENSG00000117472.8	-0.0121333	-0.0425469	1
ENSG00000146648.14	-0.0242389	-0.157266	0.00810975
ENSG00000182774.9	0	0.0226035	1
ENSG00000135678.10	0.173936	0.194958	3.75879e-11
ENSG00000167642.11	0	-0.016365	1
ENSG00000131469.11	0.00725919	0.0637843	0.189182
ENSG00000115415.17	0.462441	0.466124	0
ENSG00000092068.17	0	-0.012116	1
ENSG00000120738.7	0.061519	0.0594373	1
ENSG00000117450.12	0	0.0269436	1
ENSG00000103534.15	0	0.0173432	1
ENSG00000163931.14	0	-0.0369844	1
ENSG00000188153.11	0	-0.0596656	1
ENSG00000044574.7	0	-0.0211295	1
ENSG00000211949.3	0.836943	0.884066	0
ENSG00000163209.13	0	0.00317324	1
ENSG00000143416.19	0	0.0357289	1
ENSG00000204262.10	0.119367	0.191349	3.50794e-27
ENSG00000138326.17	0	0.00159892	1
ENSG00000171603.15	0	-0.0459771	1
ENSG00000157227.11	0.085973	0.120767	2.54742e-07
ENSG00000179869.13	0	-0.00575377	1
ENSG00000121858.9	0.23326	0.230635	4.25959e-13
ENSG00000126709.13	0.292245	0.280167	5.04574e-12
ENSG00000057149.13	0	0.00745668	1
ENSG00000203697.10	0	-0.0122896	1
ENSG00000102554.12	-0.101128	-0.134145	5.2318e-07
ENSG00000100342.19	0.208147	0.282951	4.07869e-15
ENSG00000197641.10	-0.00762031	-0.00951209	1
ENSG00000171863.11	0	0.00814716	1
ENSG00000119888.9	-0.0695466	-0.136677	0.000496604
ENSG00000178919.8	0	0.0439611	1
ENSG00000068650.17	0	-0.0846843	0.315298
ENSG00000167526.12	0.0219154	0.0796555	0.836297
ENSG00000229415.8	0	-0.0628349	0.190963
ENSG00000046604.11	-0.0404733	-0.144242	0.000532016
ENSG00000060718.17	0.0864378	0.19476	5.8775e-13
ENSG00000144476.5	0	0.0270734	1
ENSG00000139644.11	0.0248384	0.0510477	1
ENSG00000182326.13	0.508328	0.546849	0
ENSG00000170465.9	0	-0.0154169	1
ENSG00000138755.5	0.721551	0.729729	0
ENSG00000211651.3	0.831147	0.826856	0
ENSG00000136156.11	0.132306	0.13379	2.42652e-05
ENSG00000122406.11	0.0113134	0.0349833	1
ENSG00000116285.11	0	-0.0877747	1
ENSG00000162981.13	-0.0594621	-0.0946039	0.0409803
ENSG00000173369.14	0.789426	0.730669	0
ENSG00000026025.12	0.46851	0.444749	0
ENSG00000185033.13	-0.106819	-0.180098	5.15328e-11
ENSG00000166598.11	0	-0.0464252	1
ENSG00000140988.14	0	0.0396504	1
ENSG00000197635.8	0.138022	0.105082	0.0109896
ENSG00000137440.4	0	0.00317308	1
ENSG00000211945.2	0.816301	0.852495	0
ENSG00000109062.8	0	0.0492122	1
ENSG00000143153.11	-0.0388862	-0.121587	0.336728
ENSG00000053747.14	0	-0.0986885	1
ENSG00000211644.2	0.830054	0.844598	0
ENSG00000118515.10	0.094248	0.129396	0.000418571
ENSG00000099953.8	0.0910106	0.178778	2.61772e-06
ENSG00000256612.6	0	0.00555067	1
ENSG00000171903.15	0	0.0217437	1
ENSG00000204628.10	0.0901187	0.0997678	0.000711287
ENSG00000084234.15	0	-0.0325374	1
ENSG00000143819.11	0	-0.00466469	1
ENSG00000197142.9	0.242126	0.229294	1.10071e-24
ENSG00000181143.14	0.0554294	0.102628	1
ENSG00000142937.10	0	0.0362132	1
ENSG00000130203.8	0.650681	0.694655	0
ENSG00000158710.13	0.0747645	0.0935741	0.758523
ENSG00000074181.7	0	-0.0328863	1
ENSG00000170345.8	0.00902508	0.0173642	1
ENSG00000124102.4	0	0.0604465	1
ENSG00000198959.10	0.371755	0.409044	0
ENSG00000240583.9	0.222234	0.204045	8.29843e-10
ENSG00000178209.13	0	-0.0536879	1
ENSG00000198840.2	0	0.0602527	1
ENSG00000211659.2	0.823434	0.852995	0
ENSG00000111799.19	0.0341203	0.134643	4.67524e-06
ENSG00000211660.3	0.856307	0.917026	0
ENSG00000160213.5	0	0.0448521	1
ENSG00000083845.7	0.0281447	0.111617	3.03054e-05
ENSG00000142949.15	0	-0.0798637	1
ENSG00000142156.13	0.233534	0.269871	2.86379e-27
ENSG00000160211.14	0	-0.0376266	1
ENSG00000105193.7	0	0.0772662	1
ENSG00000186340.13	0.210566	0.289255	0
ENSG00000182795.12	0	0.0214888	1
ENSG00000069122.17	0.0627952	0.044737	1
ENSG00000272398.4	0	0.0169865	1
ENSG00000204580.10	-0.0229519	-0.111247	0.00113415
ENSG00000116133.10	0	-0.0445332	1
ENSG00000188643.9	0	0.0201465	1
ENSG00000111057.9	0	-0.0857506	1
ENSG00000198363.14	0	-0.0111694	1
ENSG00000090339.7	0.27453	0.237388	1.52087e-19
ENSG00000147689.15	-0.112386	-0.197687	6.50435e-07
ENSG00000127954.11	0	0.0310894	1
ENSG00000116299.15	0	-0.019673	1
ENSG00000108298.8	0	0.0508423	1
ENSG00000159212.11	0	0.0454478	1
ENSG00000156535.12	0	-0.0340939	1
ENSG00000176907.4	0	0.0430377	1
ENSG00000211653.2	0.84954	0.949152	0
ENSG00000185633.9	-0.02939	-0.0794196	1
ENSG00000204592.8	0.598958	0.541476	0
ENSG00000110955.7	0	0.0269579	1
ENSG00000122861.14	0.0728946	0.102464	0.146616
ENSG00000115648.12	0	-0.0148088	1
ENSG00000096088.15	0	-0.0422428	1
ENSG00000111716.11	0	-0.0605095	1
ENSG00000196735.10	0.820094	0.780302	0
ENSG00000120708.15	0.139472	0.154091	1.37772e-05
ENSG00000038427.14	0.139071	0.183595	7.29521e-15
ENSG00000169908.9	0.0774726	0.11473	1
ENSG00000189334.7	-0.00773992	-0.0874679	1
ENSG00000135821.15	0.195008	0.250619	4.86094e-13
ENSG00000167600.12	0.00975943	0.0735929	1
ENSG00000115758.11	-0.0496372	-0.124314	0.518534
ENSG00000204385.9	0	0.00776904	1
ENSG00000137309.18	-0.0429874	-0.0808661	1
ENSG00000161055.3	0.0843734	0.17243	4.40345e-05
ENSG00000123838.9	0	0.0632453	1
ENSG00000211898.6	0.434401	0.501576	1.28129e-39
ENSG00000242265.4	0	-0.0803839	1
ENSG00000108679.11	0.188404	0.220147	7.29296e-07
ENSG00000145423.4	0.286674	0.381865	3.95625e-33
ENSG00000165215.6	0	0.027164	1
ENSG00000062038.12	0	-0.0625158	1
ENSG00000179344.15	0.65101	0.639757	0
ENSG00000110321.14	0.025541	0.0470388	1
ENSG00000114770.15	0	-0.00384038	1
ENSG00000110195.10	0	0.0461124	1
ENSG00000120885.18	0.231986	0.285263	4.32971e-10
ENSG00000175166.15	0	-0.00585504	1
ENSG00000155380.10	0	-0.00426584	1
ENSG00000183347.14	0	0.0742495	0.00226322
ENSG00000068078.16	-0.0202094	-0.0486012	1
ENSG00000254709.5	0.859738	0.968575	0
ENSG00000185624.13	0	-0.0585801	1
ENSG00000198034.9	0.0298511	0.0536238	1
ENSG00000048540.13	0	-0.0213832	1
ENSG00000211663.2	0.824528	0.879445	0
ENSG00000163399.14	0	-0.0871275	1
ENSG00000179218.12	0	0.0331328	1
ENSG00000259803.5	0	-0.0479598	1
ENSG00000142534.5	0.0634405	0.137656	2.96286e-09
ENSG00000198502.5	0.650717	0.639825	0
ENSG00000211666.2	0.86125	0.965638	0
ENSG00000105220.13	0	-0.0232802	1
ENSG00000145592.12	-0.0124348	-0.0523889	1
ENSG00000148346.10	0	0.137064	0.277619
ENSG00000185567.6	-0.023877	-0.157619	0.000313465
ENSG00000149021.5	0.048669	0.163917	0.00150551
ENSG00000087245.11	0.32672	0.407265	0
ENSG00000012223.11	0.232601	0.336573	1.57785e-15
ENSG00000130635.14	0.138994	0.198341	4.31056e-30
ENSG00000005884.16	0	-0.0722408	1
ENSG00000106624.7	0.275876	0.330577	0
ENSG00000134333.12	0	-0.0661414	1
ENSG00000189377.7	0	0.10047	1
ENSG00000161203.12	0	0.047141	1
ENSG00000117595.9	-0.0338514	-0.102045	0.000594183
ENSG00000137801.10	0.256509	0.254762	5.69718e-18
ENSG00000114867.18	0	-0.0719694	1
ENSG00000167996.14	0.124636	0.152974	6.78437e-08
ENSG00000196188.9	0.066833	0.111582	0.664787
ENSG00000147403.15	0.0868518	0.104183	0.000494588
ENSG00000105372.5	0	0.0898973	0.0936447
ENSG00000182899.13	0	0.057518	0.987122
ENSG00000102144.12	0	-0.0199745	1
ENSG00000133110.13	0.239192	0.334223	1.66855e-40
ENSG00000265972.4	0.385595	0.388794	1.25005e-29
ENSG00000087460.22	0	0.031195	1
ENSG00000148303.15	0.0179463	0.104789	0.000196095
ENSG00000143320.7	0	-0.00426918	1
ENSG00000121742.14	0	-0.00521592	1
ENSG00000143546.8	0.00396357	0.0914887	1
ENSG00000142192.19	0	-0.0227963	1
ENSG00000142173.13	0.294677	0.351244	0
ENSG00000223865.9	0.776646	0.763916	0
ENSG00000174444.13	0	0.00680382	1
ENSG00000108846.14	0.0627287	0.100987	0.478827
ENSG00000211966.2	0.837728	0.921395	0
ENSG00000145113.20	-0.0385278	-0.0710775	1
ENSG00000196260.3	0	-0.0392288	1
ENSG00000184292.6	0	0.0118948	1
ENSG00000111669.13	-0.0104785	-0.0555752	1
ENSG00000101443.16	0	-0.0248384	1
ENSG00000167972.12	0.0456848	0.0409591	1
ENSG00000163191.5	0	0.0518605	1
ENSG00000142657.19	0	-0.0192763	1
ENSG00000145824.11	0.145661	0.22394	0.000572261
ENSG00000074410.12	0	-0.0167149	1
ENSG00000196611.4	0.0285046	0.132146	0.380986
ENSG00000187908.14	0.0262408	0.0631432	1
ENSG00000069849.9	0	0.0466913	1
ENSG00000171476.20	0.0924893	0.127588	0.0081463
ENSG00000205542.9	0.291462	0.323639	4.219e-19
ENSG00000124107.5	0.038977	0.107395	1
ENSG00000196230.11	0	-0.0097367	1
ENSG00000198183.10	0	0.0650477	1
ENSG00000087494.14	-0.122891	-0.173915	1.14299e-11
ENSG00000153446.14	0	0.00534749	1
ENSG00000001084.9	0	-0.0117851	1
ENSG00000198848.11	0.142742	0.203043	3.2128e-06
ENSG00000100316.14	0	0.0492748	1
ENSG00000129824.14	-0.0100962	-0.0225861	1
ENSG00000101144.11	0	0.0384749	1
ENSG00000026508.15	0.16243	0.173821	8.13957e-08
ENSG00000109971.12	0.0873516	0.09299	0.533246
ENSG00000034510.5	0.124093	0.156936	8.47569e-07
ENSG00000142541.15	0.048671	0.136205	6.38982e-06
ENSG00000149273.13	0	0.0591805	1
ENSG00000070087.12	-0.0412932	-0.0880893	1
ENSG00000131746.11	0	-0.0190819	1
ENSG00000096384.18	0	-0.0932909	0.218943
ENSG00000121552.3	0	0.100078	0.000476563
ENSG00000129538.12	0.297616	0.335042	1.69441e-24
ENSG00000084207.14	-0.0303215	-0.0486791	1
ENSG00000196878.11	-0.00424154	-0.1477	0.197102
ENSG00000182492.14	0.32454	0.404069	0
ENSG00000211662.2	0.8312	1.05801	0
ENSG00000103257.7	-0.02123	-0.0512009	1
ENSG00000117984.11	0.331766	0.390785	8.43582e-43
ENSG00000169469.8	0	0.00832536	1
ENSG00000080824.17	0	-0.0447547	1
ENSG00000164924.16	-0.0213291	-0.0772751	0.840999
ENSG00000170421.10	-0.00705935	-0.070745	1
ENSG00000011465.15	0.385585	0.453307	1.33301e-35
ENSG00000137648.15	-0.0661583	-0.107788	1
ENSG00000245532.5	0	0.0180161	1
ENSG00000171557.15	-0.0279249	-0.157185	0.0496734
ENSG00000198695.2	0.0652535	0.148444	0.00024333
ENSG00000133661.14	0.0551412	0.0833256	0.877777
ENSG00000124942.12	0.0384413	0.0656569	1
ENSG00000103044.9	0	-0.0684577	1
ENSG00000165092.11	0.0787144	0.201579	1.46701e-05
ENSG00000165474.5	0	0.0198884	1
ENSG00000148053.14	0.0245278	0.114861	0.000386648
ENSG00000211679.2	0.838812	1.07316	0
ENSG00000272620.1	0.0807593	0.0783223	1
ENSG00000198431.14	0	0.00246205	1
ENSG00000124466.8	0	0.03721	1
ENSG00000135046.12	0.102951	0.137892	0.713967
ENSG00000013588.5	0	-0.0880996	1
ENSG00000100345.19	0	-0.0124152	1
ENSG00000099194.5	-0.0257955	-0.123373	1
ENSG00000115461.4	0	0.0784755	1
ENSG00000243466.1	0.87471	1.08979	0
ENSG00000163993.6	-0.0522813	-0.0901219	1
ENSG00000137154.11	0.122341	0.192666	7.44355e-12
ENSG00000241351.2	0.892964	1.13869	0
ENSG00000196924.13	0.0695057	0.0919157	1
ENSG00000151914.16	0	-0.0422116	1
ENSG00000230937.8	0	0.00644267	1
ENSG00000125999.9	0.0661039	0.203883	0.00174586
ENSG00000106278.10	0	-0.0234457	1
ENSG00000164265.7	0	-0.0517388	1
ENSG00000231389.6	0.769714	0.831706	0
ENSG00000137818.10	0	0.0822776	1
ENSG00000211890.3	0.728235	1.01611	0
ENSG00000182718.15	0.0643871	0.09173	0.178034
ENSG00000171401.13	0	-0.000430282	1
ENSG00000132470.12	0	-0.0496105	1
ENSG00000137975.7	0	-0.0186243	1
ENSG00000206503.10	0.539126	0.658394	0
ENSG00000152661.7	0	-0.105348	0.640046
ENSG00000181019.11	0	-0.0154475	1
ENSG00000115884.9	0	-0.0390779	1
ENSG00000136352.16	0	-0.0623641	1
ENSG00000165949.11	0.309338	0.408184	8.08424e-18
ENSG00000239951.1	0.889845	1.11514	0
ENSG00000161016.14	-0.00300263	-0.0490571	1
ENSG00000163359.14	0.281639	0.408082	0
ENSG00000149925.15	-0.00627139	-0.0651048	1
ENSG00000139329.4	0.352958	0.456211	1.29046e-31
ENSG00000047457.12	0.00802345	0.0776126	1
ENSG00000091409.13	0	0.0176704	1
ENSG00000204525.13	0.614993	0.749919	0
ENSG00000075618.16	0	-0.0301035	1
ENSG00000197956.8	0.0385273	0.115298	1
ENSG00000070756.12	-0.00927873	-0.0678478	1
ENSG00000167658.14	0.0403689	0.0693399	1
ENSG00000173801.15	-0.0952612	-0.150696	6.15675e-08
ENSG00000211677.2	0.896752	1.25089	0
ENSG00000211598.2	0.883531	1.19099	0
ENSG00000175899.13	0.39006	0.482848	0
ENSG00000196126.9	0.739042	0.917709	0
ENSG00000197746.12	0.348551	0.421001	0
ENSG00000154277.11	0	-0.0245069	1
ENSG00000231500.5	0.0257608	0.0743445	1
ENSG00000063660.7	0	-0.00134819	1
ENSG00000074800.12	0	-0.0551366	1
ENSG00000106211.8	0	0.0211988	1
ENSG00000178363.4	0	-0.00371927	1
ENSG00000075624.12	0.136235	0.187097	2.98947e-07
ENSG00000101384.10	0	-0.0227705	1
ENSG00000153395.8	0	-0.0523959	1
ENSG00000058085.13	0	-0.0638149	1
ENSG00000113140.9	0.301348	0.411074	0
ENSG00000090382.5	0.75303	0.923401	0
ENSG00000181449.3	-0.0291157	-0.0592361	1
ENSG00000089157.14	0	0.0591861	1
ENSG00000198786.2	0.0928072	0.185044	1.46582e-08
ENSG00000198899.2	0.00835296	0.108304	0.0171774
ENSG00000146674.13	0	0.0333813	1
ENSG00000133112.15	0.145185	0.213903	1.52603e-10
ENSG00000186847.5	0	0.018966	1
ENSG00000010278.10	0	0.0482563	1
ENSG00000198888.2	0.0236309	0.109305	0.790859
ENSG00000130821.14	-0.0745528	-0.11547	0.00269247
ENSG00000164733.19	0.324253	0.428487	3.5375e-33
ENSG00000206075.12	-0.0146613	-0.0647598	1
ENSG00000089356.15	0	0.0474876	1
ENSG00000165272.13	-0.047001	-0.115829	1
ENSG00000086570.11	0	0.00956624	1
ENSG00000125730.15	0.380791	0.601566	2.38571e-41
ENSG00000108602.16	0	-0.0161471	1
ENSG00000175793.11	0	-0.0357979	1
ENSG00000072274.11	0.0358687	0.104041	0.705118
ENSG00000067225.16	0	-0.0167083	1
ENSG00000198763.3	0	0.0761247	1
ENSG00000132465.9	0.836812	1.24419	0
ENSG00000102854.13	0	0.0664379	1
ENSG00000163347.5	0.0306835	0.0806029	1
ENSG00000197249.11	0.255876	0.343474	2.38493e-12
ENSG00000041982.13	0.0374413	0.0327419	1
ENSG00000106541.10	-0.114793	-0.198011	0.00064309
ENSG00000162896.5	0.11451	0.260803	2.62406e-06
ENSG00000185479.5	0	0.0508537	1
ENSG00000117983.16	0	0.0559577	1
ENSG00000184009.8	0	-0.013948	1
ENSG00000065618.15	0	-0.0733089	1
ENSG00000198727.2	0.0427119	0.151835	2.47348e-06
ENSG00000198712.1	0	0.0578139	1
ENSG00000198804.2	0	0.0346613	1
ENSG00000198074.8	0	0.0136068	1
ENSG00000096696.12	-0.0921913	-0.179476	0.0800194
ENSG00000136235.14	0.2167	0.350686	1.27786e-13
ENSG00000114270.14	-0.0132642	-0.0496323	1
ENSG00000211892.3	0.694411	1.10575	0
ENSG00000198886.2	0	-0.00309589	1
ENSG00000166710.16	0.650406	0.984141	0
ENSG00000204287.12	0.791055	1.14104	0
ENSG00000110400.9	-0.0110475	-0.0816525	0.453989
ENSG00000234745.8	0.680585	0.985963	0
ENSG00000134757.4	0	-0.0223385	1
ENSG00000196139.10	0	9.08474e-05	1
ENSG00000135480.13	0.0157744	0.0758542	1
ENSG00000198938.2	0.0198398	0.121213	0.0423014
ENSG00000171345.12	-0.0186988	-0.0889498	1
ENSG00000211893.3	0.843483	1.48714	0
ENSG00000156508.16	0.154012	0.232825	6.98777e-12
ENSG00000185499.15	0	-0.0259699	1
ENSG00000115457.8	-0.0575801	-0.158553	1
ENSG00000211897.6	0.838871	1.52578	0
ENSG00000104419.13	-0.144819	-0.295808	1.35426e-08
ENSG00000210082.2	0	-0.0785393	1
ENSG00000171346.12	0	-0.0479289	1
ENSG00000118785.12	0.210375	0.397477	2.46406e-09
ENSG00000105388.13	-0.0126923	-0.048518	1
ENSG00000211899.6	0.827115	1.51885	0
ENSG00000134762.15	0	-0.00109007	1
ENSG00000164692.16	0.205265	0.434963	0
ENSG00000163220.10	0.0539951	0.129763	1
ENSG00000087086.12	0.320446	0.523948	2.01348e-33
ENSG00000196754.9	0	-0.07205	1
ENSG00000186832.7	0	0.0375327	1
ENSG00000112378.11	-0.00513375	-0.027065	1
ENSG00000176153.11	-0.0805211	-0.113504	1
ENSG00000115414.17	0.278934	0.48997	5.30298e-35
ENSG00000117394.18	-0.104776	-0.215366	3.28779e-09
ENSG00000019582.13	0.758975	1.34842	0
ENSG00000187134.11	0	0.0113423	1
ENSG00000111640.13	-0.0366076	-0.0992379	1
ENSG00000168542.11	0.25163	0.537213	0
ENSG00000137699.15	0	0.124284	0.30973
ENSG00000157765.10	0.0325439	0.0956374	1
ENSG00000073282.11	0	0.0369045	1
ENSG00000131400.6	0	-0.0455437	1
ENSG00000108821.12	0.177671	0.484986	1.26203e-32
ENSG00000168484.11	0.119374	0.234975	0.000916715
ENSG00000086548.8	0.00362692	0.128379	1
ENSG00000151632.15	-0.0397242	-0.0692947	1
ENSG00000211895.4	0.829197	2.00197	0
ENSG00000122852.13	0.00225128	0.0357995	1
ENSG00000081277.10	-0.0366836	-0.112884	1
ENSG00000211592.5	0.934934	2.40134	0
ENSG00000185303.14	0	-0.00278716	1
ENSG00000168878.15	-0.0227571	-0.169342	1
ENSG00000211896.5	0.884221	2.68551	0
ENSG00000128422.14	-0.0214707	-0.0792399	1
ENSG00000205420.9	0	0.0162181	1
ENSG00000186081.10	0.00121185	0.113362	1

## Sheet: cn_Immune
Aberration	funcSFA Coefficient	OLS Coefficient	p
Gain0	0	-0.01952	1
Gain1	0	-0.0763052	1
Gain2	-0.159406	-0.167563	0.0148242
Gain3	-0.149753	-0.152357	0.0214631
Gain4	-0.139727	-0.160511	0.0044851
Gain5	-0.152039	-0.132141	0.27072
Gain6	-0.0366335	-0.0354868	1
Gain7	-0.0826761	-0.0665645	1
Gain8	-0.10612	-0.0684839	1
Gain9	0.0632673	0.106191	1
Gain10	-0.0468677	-0.0986109	1
Gain11	-0.0274405	-0.0725507	1
Gain12	-0.0303654	-0.0731093	1
Gain13	0	0.000479384	1
Gain14	0	-0.0195971	1
Gain15	0	-0.00908571	1
Gain16	-0.174804	-0.25372	0.0036037
Gain17	-0.16786	-0.2511	0.00784498
Gain18	-0.176981	-0.228487	0.0161676
Gain19	-0.2102	-0.260449	0.000302136
Gain20	-0.24885	-0.320809	2.22434e-06
Gain21	-0.145209	-0.169059	0.0224396
Gain22	-0.163253	-0.15361	0.072264
Gain23	-0.226519	-0.353106	8.16371e-05
Gain24	-0.0464136	-0.0897235	1
Gain25	-0.0193216	-0.0456474	1
Gain26	-0.101028	-0.207634	1
Gain27	-0.0753735	-0.149572	1
Gain28	-0.0612979	-0.118238	1
Gain29	-0.191782	-0.247255	9.93879e-05
Gain30	-0.215637	-0.244289	1.29305e-06
Gain31	-0.236103	-0.269757	1.31152e-06
Gain32	-0.252016	-0.317482	2.91596e-06
Gain33	0.0813037	0.128297	1
Gain34	0	0.0541	1
Gain35	0	-0.0175863	1
Gain36	0	-0.0426883	1
Gain37	-0.0528031	-0.083079	1
Gain38	-0.0496177	-0.0594553	1
Gain39	0	-0.0324258	1
Gain40	-0.00252873	-0.0353648	1
Gain41	-0.0762392	-0.0993875	1
Gain42	-0.131027	-0.152108	0.469653
Gain43	-0.119869	-0.179219	1
Gain44	0	0.0333094	1
Gain45	0	-0.0174718	1
Gain46	-0.0489033	-0.0740961	1
Gain47	-0.0941214	-0.122916	1
Gain48	-0.0851555	-0.161961	1
Gain49	-0.111025	-0.158922	1
Gain50	-0.0494648	-0.0445438	1
Gain51	-0.0151879	-0.0508071	1
Gain52	0	-0.00802428	1
Gain53	-0.0561196	-0.0642987	1
Gain54	-0.04069	-0.0479402	1
Gain55	-0.0124485	-0.0254707	1
Gain56	-0.0292188	-0.0563842	1
Gain57	0	-0.00320424	1
Gain58	0	0.0532726	1
Gain59	0	0.0161808	1
Gain60	0.0903288	0.145497	1
Gain61	-0.0708883	-0.0888048	1
Gain62	0	0.000310641	1
Gain63	-0.0940873	-0.091419	1
Gain64	-0.129312	-0.147723	0.136559
Gain65	-0.0996705	-0.10592	1
Gain66	0.0420307	0.051981	1
Gain67	-0.136074	-0.135384	1
Gain68	0	0.0124108	1
Gain69	0	-0.0244707	1
Loss70	0.0383325	0.0486608	1
Loss71	0	-0.0321675	1
Loss72	0	-0.0220298	1
Loss73	0	-0.0172374	1
Loss74	0.0571452	0.0461009	1
Loss75	0	-0.010461	1
Loss76	0.144686	0.140186	0.012259
Loss77	0.114234	0.148215	0.200815
Loss78	0.144972	0.120682	0.0536934
Loss79	0.173013	0.165874	0.026795
Loss80	0.127669	0.112359	0.270524
Loss81	0.118968	0.107419	1
Loss82	0.039082	0.029022	1
Loss83	0.0543305	0.0541955	1
Loss84	0	-0.0025209	1
Loss85	-0.00930978	-0.0467625	1
Loss86	0.0453945	0.0410271	1
Loss87	0.113306	0.108993	0.434989
Loss88	0.128324	0.155937	1
Loss89	0.130381	0.116068	1
Loss90	0.250892	0.218087	5.77553e-05
Loss91	0.236736	0.198714	0.000138007
Loss92	0.140726	0.137625	0.626516
Loss93	0.187342	0.150257	0.00155778
Loss94	0.164743	0.137583	0.0682743
Loss95	0.221703	0.172619	0.000106235
Loss96	0.203184	0.154946	0.000294791
Loss97	0.239179	0.179941	4.99354e-06
Loss98	0.202583	0.189453	0.000869971
Loss99	0.209603	0.1851	9.76056e-05
Loss100	0.194485	0.175804	0.00155511
Loss101	-0.0812305	-0.115587	0.210536
Loss102	0.00357629	0.0330796	1
Loss103	0.0886182	0.124286	1
Loss104	0.07029	0.0920716	1
Loss105	0.109293	0.120429	0.742101
Loss106	0.123475	0.130067	0.396221
Loss107	0.146098	0.161196	0.050182
Loss108	0	0.0184892	1
Loss109	0.0982024	0.18859	1
Loss110	0.10702	0.200692	1
Loss111	0.092689	0.159346	1
Loss112	0.0771679	0.139042	1
Loss113	0.0964501	0.146209	1
Loss114	0.276517	0.378002	1.97463e-10
Loss115	0.266462	0.364225	2.16298e-09
Loss116	0.260112	0.340045	5.05972e-09
Loss117	0.236358	0.294289	1.63373e-06
Loss118	0.27867	0.322505	9.90735e-11
Loss119	0.256125	0.298864	2.19222e-08
Loss120	0.219398	0.39354	0.00140394
Loss121	0.158547	0.228457	0.00123381
Loss122	0.170309	0.185299	0.000118374
Loss123	0	0.0244358	1
Loss124	0.0334451	0.0823505	1
Loss125	0	0.0466408	1
Loss126	0	0.0530851	1
Loss127	0.0490439	0.0993492	1
Loss128	0	0.048889	1
Loss129	0	0.0228245	1
Loss130	0	0.0229428	1
Loss131	0	0.0362164	1
Loss132	0.0272624	0.0488781	1
Loss133	0.0420615	0.0514509	1
Loss134	0.0250841	0.0583138	1
Loss135	0.0314992	0.0672039	1
Loss136	0.0466386	0.0672676	1
Loss137	0.0303691	0.054525	1
Loss138	0.0605189	0.0938641	1
Loss139	0.0925264	0.121496	1
Loss140	0	0.021957	1
Loss141	0.0254892	0.0554855	1
Loss142	0.0152422	0.0419338	1
Loss143	0.0123874	0.0389268	1
Loss144	0.139904	0.0973265	1
Loss145	0	0.00323369	1
Loss146	0	0.00747398	1
Loss147	0	-0.0192802	1
Loss148	0	-0.00969764	1
Loss149	0	0.00450219	1
Loss150	0	-0.0308222	1
Loss151	0	-0.011989	1
Loss152	0	-0.0369722	1
Loss153	0	-0.00744251	1
Loss154	0	-0.00538829	1
Loss155	0	0.0433205	1
Loss156	0	0.0042728	1
Loss157	0.180397	0.312274	0.000119554
Loss158	0.142359	0.163137	0.000760269
Loss159	0.0632543	0.0989183	1
Loss160	0.0681965	0.0713334	1
Loss161	0.0482206	0.0595075	1
Loss162	0.022992	0.0406582	1
Loss163	0.0197847	0.0535289	1
Loss164	0.0693835	0.115554	1
Loss165	-0.0935033	-0.104041	1
Loss166	0	-0.0365647	1
Loss167	0	-0.0445642	1
Loss168	0	-0.0501971	1
Loss169	0	-0.0474197	1
Loss170	0	0.0288613	1
Loss171	0.0171533	0.0509296	1
Loss172	0.142981	0.141843	0.0216899
Loss173	0.158215	0.164	0.0227176
Loss174	0.0744679	0.0936229	1
Loss175	0.0513827	0.0757144	1
Loss176	0.0458481	0.0651788	1
Loss177	0.0331126	0.0535776	1
Loss178	0.0659753	0.0594984	1
Loss179	0.0837746	0.0800094	1
Loss180	0.0726475	0.0861863	1
Loss181	0.0777671	0.0875986	1
Loss182	0.0770783	0.0967228	1
Loss183	0.0377583	0.0327997	1
Loss184	0.0202516	0.0727009	1
Loss185	0	0.028903	1
Loss186	0	0.00243156	1
Loss187	0	0.0393435	1
Loss188	0.113995	0.121128	0.623328
Loss189	0.115275	0.125767	0.484672
Loss190	0.116422	0.136659	0.0736456
Loss191	0.106228	0.136747	0.122902
Loss192	0.012088	0.0653724	1
Loss193	0.0180206	0.0674877	1
Loss194	0.00459825	0.0377391	1
Loss195	0.022552	0.0666759	1
Loss196	-0.00839569	-0.0200019	1
Loss197	-0.0192264	-0.0453844	1
Loss198	-0.0825377	-0.0925608	1
Loss199	0	-0.0124188	1
Loss200	0	0.0155377	1
Loss201	0.0439928	0.0525111	1
Loss202	0.00497014	0.0234199	1
Loss203	0.0610473	0.0647129	1
Loss204	-0.125201	-0.14636	0.108275
Loss205	0.0131106	0.038901	1
Loss206	0	0.0358285	1
Loss207	0.0226064	0.0651657	1
Loss208	0.00808581	0.0539473	1
Loss209	0.00646829	0.042681	1
Loss210	0	-0.0146397	1
Loss211	0	0.029934	1
Loss212	0	0.0121882	1

## Sheet: rppa_Adenocarcinoma
Epitope	funcSFA Coefficient	OLS Coefficient	p
14-3-3_beta	0	-0.0192496	1
14-3-3_epsilon	0.00442514	0.0200739	1
14-3-3_zeta	0.0485285	0.0830952	1
4E-BP1	0.113063	0.147873	0.25322
4E-BP1_pS65	0.189965	0.116385	2.9683e-07
4E-BP1_pT37_T46	0.0720661	0.115133	1
4E-BP1_pT70	0.0430932	0.0600409	1
53BP1	0.223021	0.244962	1.08012e-12
A-Raf	0.0196056	0.011457	1
A-Raf_pS299	-0.165252	-0.131939	0.0577204
ACC1	0.176959	0.230297	0.00105938
ACC_pS79	0.0688154	0.0892925	1
ACVRL1	-0.0803317	-0.064332	0.0676259
ADAR1	0.121676	0.0939124	0.0259166
AMPK_alpha	-0.0158493	-0.0188388	1
AMPK_pT172	-0.0651432	-0.0994124	1
AR	0.0280622	0.0263053	1
ARID1A	0.197202	0.149467	1.202e-06
ASNS	0.255855	0.371682	1.3737e-09
ATM	0.0159851	0.0280409	1
Acetyl-a-Tubulin-Lys40	0.0919677	0.171692	1
Akt	-0.0182646	-0.047513	1
Akt_pS473	-0.178858	-0.263453	0.00132089
Akt_pT308	-0.172816	-0.184346	0.0101131
Annexin-1	-0.235863	-0.364949	1.79314e-07
Annexin_VII	-0.0229207	-0.0205575	1
B-Raf	0.0656659	0.085975	1
B-Raf_pS445	0	0.00223888	1
BRD4	0.140671	0.142485	0.000202484
Bad_pS112	-0.102708	-0.0849877	0.0339882
Bak	0	0.0158126	1
Bap1-c-4	0.166784	0.128635	3.71995e-05
Bax	0.0324707	0.0398985	1
Bcl-2	0.0309936	0.0465771	1
Bcl-xL	0.00778343	0.0120896	1
Bcl2A1	-0.00427212	-0.00127448	1
Beclin	0	-0.0109293	1
Bid	0	0.00156846	1
Bim	0.253719	0.226196	3.24791e-09
C-Raf	0.0611965	0.0380921	1
C-Raf_pS338	0	-0.000172997	1
CD20	0.120122	0.0725393	0.0703432
CD26	0.00945597	0.0239696	1
CD31	-0.0530999	-0.058345	1
CD49b	-0.123739	-0.108593	1
CDK1	0	0.0239591	1
CDK1_pY15	0.0590663	0.0656925	1
COG3	0.0452714	0.0492492	1
Caspase-3	0.0470723	0.0629108	1
Caspase-7_cleavedD198	0.171818	0.250699	0.0027826
Caspase-8	-0.0199273	-0.0567893	1
Caveolin-1	-0.333221	-0.68975	7.70744e-17
Chk1	0.114834	0.107349	0.000823522
Chk1_pS296	0.0935201	0.0565416	0.00957805
Chk1_pS345	0.0303806	0.031267	1
Chk2	0.211126	0.186243	1.7042e-06
Chk2_pT68	0.206733	0.116998	1.86097e-11
Claudin-7	0.124921	0.20469	0.569087
Collagen_VI	-0.064011	-0.0765963	1
Cyclin_B1	0.390159	0.562888	5.37733e-24
Cyclin_D1	0.0564892	0.0533066	1
Cyclin_E1	0.0229399	0.0495348	1
Cyclin_E2	0.225643	0.119143	7.76085e-12
DIRAS3	-0.026983	-0.0246817	1
DJ-1	0	-0.00844405	1
DUSP4	0.268825	0.364932	1.5724e-10
Dvl3	0	0.020237	1
E-Cadherin	-0.0160434	-0.0440485	1
EGFR	-0.073321	-0.0723292	1
EGFR_pY1068	-0.0993128	-0.151726	1
EGFR_pY1173	0	0.0123563	1
EPPK1	-0.08937	-0.244729	1
ER-alpha	0.0265248	0.0226886	1
ER-alpha_pS118	0.129345	0.0657574	0.119409
ERCC1	-0.0117788	-0.0393885	1
ERCC5	0.0824647	0.0692615	1
ERK2	-0.0673155	-0.0885155	1
ETS-1	-0.0501731	-0.0352938	1
FASN	0.175933	0.247351	0.00102253
FOXO3a	-0.0453099	-0.0338112	1
FOXO3a_pS318_S321	-0.114732	-0.0646854	0.00480045
Fibronectin	0.175001	0.274037	0.00021872
FoxM1	0.297514	0.271067	1.13174e-13
G6PD	0.0667993	0.104513	1
GAB2	0.165111	0.177515	0.00136383
GAPDH	0.0605779	0.138795	1
GATA3	0	-0.00316254	1
GSK3-alpha-beta	0	0.000149827	1
GSK3-alpha-beta_pS21_S9	-0.118883	-0.165165	0.0655118
GSK3_pS9	-0.123272	-0.184411	0.0752952
HER2	-0.0739983	-0.109009	1
HER2_pY1248	-0.0699747	-0.070374	1
HER3	0.0413489	0.0477565	1
HER3_pY1289	0.0363591	0.0386335	0.324513
HSP70	0	0.0266598	1
Heregulin	0	0.0112313	1
IGF1R_pY1135_Y1136	0	-0.0134577	1
IGFBP2	0.18473	0.426132	0.000543226
INPP4B	-0.0349246	-0.0605637	1
IRF-1	0.01074	0.0176896	1
IRS1	0	0.0209886	1
JAB1	0	-0.0115696	1
JNK2	-0.0501035	-0.0535847	1
JNK_pT183_pY185	0	-0.0095343	1
Jak2	0.0445592	0.0309795	1
Ku80	0.105236	0.105924	0.0318092
LKB1	0	-0.00473443	1
Lck	-0.0991668	-0.0922632	0.591158
MAPK_pT202_Y204	-0.144046	-0.176124	0.0739913
MEK1	0	-0.0118578	1
MEK1_pS217_S221	0	0.00182533	1
MIG-6	0	0.0265118	1
MSH2	0.192702	0.185039	2.11599e-08
MSH6	0.293831	0.327408	1.1148e-20
MYH11	-0.222981	-0.608596	1.7206e-05
Mre11	0.0100983	0.0312158	1
Myosin-IIa_pS1943	-0.109918	-0.135219	1
N-Cadherin	0.0844418	0.0594936	0.187084
N-Ras	-0.0262092	-0.0207615	1
NDRG1_pT346	-0.199895	-0.439923	0.000911944
NF-kB-p65_pS536	0.0279472	0.0437118	1
NF2	-0.0286543	-0.0431182	1
Notch1	0	-0.00548946	1
P-Cadherin	-0.0451564	-0.0346847	1
PAI-1	0.0793311	0.181067	1
PARP_cleaved	-0.00465826	-0.0384663	1
PCNA	0.243744	0.168045	1.95117e-10
PDCD4	-0.125172	-0.1834	0.304367
PDK1	-0.0546711	-0.0391871	1
PDK1_pS241	-0.168424	-0.114303	1.5037e-06
PEA15	-0.0632997	-0.0564296	1
PEA15_pS116	0.0126642	0.0172121	1
PI3K-p110-alpha	-0.0939986	-0.0596613	1
PI3K-p85	-0.196751	-0.131729	1.57867e-07
PKC-alpha	-0.0610033	-0.0774817	1
PKC-alpha_pS657	-0.0960374	-0.109778	0.391817
PKC-delta_pS664	0.0356894	0.0131384	1
PKC-pan_BetaII_pS660	-0.144123	-0.187211	4.04583e-06
PR	0.000755977	0.0136333	1
PRAS40_pT246	-0.0149833	-0.0194948	1
PRDX1	0	0.0198512	1
PREX1	-0.0148015	-0.0304558	1
PTEN	-0.0853597	-0.0905472	1
Paxillin	-0.0318115	-0.0595896	1
RBM15	0.188971	0.207949	1.98486e-08
Rab11	-0.111689	-0.0627528	0.178304
Rab25	0	-0.0181764	1
Rad50	0	0.00406656	1
Rad51	0.0536143	0.0566541	1
Raptor	0.0527154	0.046239	1
Rb	0	-0.00350075	1
Rb_pS807_S811	0.12598	0.167668	0.515074
Rictor	-0.144155	-0.228661	0.0347237
Rictor_pT1135	0	-0.0059507	1
S6	0.162925	0.153068	0.0103523
S6_pS235_S236	-0.0125114	-0.0384143	1
S6_pS240_S244	0.0343627	0.0620039	1
SCD	0	-0.00899336	1
SETD2	-0.00298916	-0.0311261	1
SF2	0.0462727	0.0425021	1
SHP-2_pY542	-0.219802	-0.17384	6.55104e-07
STAT3_pY705	-0.1189	-0.118057	0.0648198
STAT5-alpha	0.0236186	0.036842	1
Shc_pY317	-0.0587824	-0.0451959	1
Smac	0.129944	0.135135	0.601943
Smad1	0.0871312	0.0657268	0.0509741
Smad3	0	0.00560789	1
Smad4	0.0110637	0.0250512	1
Snail	-0.031404	-0.0725307	1
Src	-0.0214994	-0.0322949	1
Src_pY416	-0.0811346	-0.101972	1
Src_pY527	-0.0956878	-0.125012	1
Stathmin	0.227011	0.141638	3.15748e-18
Syk	0	0.0027449	1
TAZ	-0.0233828	-0.00961089	1
TFRC	0.168694	0.32508	0.00699037
TIGAR	0.0361267	0.0376254	1
TSC1	0	-0.00165374	1
TTF1	0	0.00389874	1
Transglutaminase	-0.125767	-0.153268	0.097589
Tuberin	0.023299	0.027528	1
Tuberin_pT1462	-0.0404874	-0.0491921	1
VEGFR2	-0.12045	-0.13014	1
XBP1	-0.013216	-0.0240315	1
XRCC1	0.314807	0.1727	2.72317e-19
YAP	0	-0.00499457	1
YAP_pS127	-0.180734	-0.209122	0.000914358
YB-1	0	0.0136447	1
YB-1_pS102	-0.0190327	-0.0297107	1
beta-Catenin	0	0.00310305	1
c-Abl	0.045882	0.0526476	0.665254
c-Jun_pS73	-0.0311669	-0.0399613	1
c-Kit	0.203144	0.298193	7.19145e-05
c-Met	-0.0816877	-0.144202	1
c-Met_pY1235	0.162315	0.0755356	9.79666e-12
c-Myc	0.0271523	0.0387549	1
cIAP	0.00520348	0.0204271	1
eEF2	0	0.0159506	1
eEF2K	0	-0.00465126	1
eIF4E	0	0.0103517	1
eIF4G	0.168405	0.280508	4.85842e-07
mTOR	0.0121791	0.0134009	1
mTOR_pS2448	-0.0857718	-0.0802066	0.174449
p16_INK4a	0.0434861	0.108732	1
p21	0.0446572	0.0734053	1
p27	0	-0.0206356	1
p27_pT157	0.0386678	0.0436971	1
p27_pT198	0.189447	0.0959753	9.07252e-07
p38_MAPK	-0.123937	-0.0858772	0.00256354
p38_pT180_Y182	-0.268928	-0.308352	1.21129e-09
p53	0.0330186	0.0570453	1
p62-LCK-ligand	0.0120098	0.0275287	1
p70S6K	0.159842	0.127139	0.0001398
p70S6K_pT389	0.110919	0.0581426	1
p90RSK	-0.0898809	-0.0923122	0.175816
p90RSK_pT359_S363	-0.0244976	-0.036305	1

[truncated: 20 more sheets: rnaseq_Adenocarcinoma, cn_Adenocarcinoma, rppa_Infiltrating B-cells, rnaseq_Infiltrating B-cells, cn_Infiltrating B-cells, rppa_BSCC, rnaseq_BSCC, cn_BSCC, rppa_EMT, rnaseq_EMT, cn_EMT, rppa_Mitochrondia, rnaseq_Mitochrondia, cn_Mitochrondia, rppa_NFE2L2, rnaseq_NFE2L2, cn_NFE2L2, rppa_8p11 Gained, rnaseq_8p11 Gained, cn_8p11 Gained]
